# Supplementary material for: Stem cell transcriptome profiling via massive-scale mRNA sequencing
Source: Springer Nature journal article supplement (doi:10.1038/nmeth.1223), 2008-05-30
Supplement: 41592_2008_BFnmeth1223_MOESM17_ESM.pdf [file 41592_2008_BFnmeth1223_MOESM17_ESM.pdf]

# Stem cell transcriptome profiling via massive-scale mRNA sequencing

Nicole Cloonan, Alistair R R Forrest, Gabriel Kolle, Brooke B A Gardiner, Geoffrey J Faulkner, Mellissa K Brown, Darrin F Taylor, Anita L Steptoe, Shivangi Wani, Graeme Bethel, Alan J Robertson, Andrew C Perkins, Stephen J Bruce, Clarence C Lee, Swati S Ranade, Heather E Peckham, Jonathan M Manning, Kevin J McKernan & Sean M Grimmond

Supplementary figures and text:

**Supplementary Figure 1.** Mapping strategy for SQRL gene expression data.

**Supplementary Figure 2.** Evaluation of multimapping rescue of SQRL gene expression tags.

**Supplementary Figure 3.** Tag matching at multiple stringencies.

**Supplementary Figure 4.** Cumulative discovery plots of ESC and EB sequencing libraries.

**Supplementary Figure 5.** Tag bias by sequence content.

**Supplementary Figure 6.** High level of correlation for SQRL libraries.

**Supplementary Figure 7.** Strong concordance between SQRL-SOLiD and Illumina in the detection of differential expression.

**Supplementary Figure 8.** Comparison to the MPSS files line from the mouse transcriptome project.

**Supplementary Figure 9.** Enrichment of exon versus intron expression for detected Refseq genes.

**Supplementary Figure 10.** Bias in tags across the length of transcripts.

**Supplementary Figure 11.** Identification of putative alternative splicing in SQRL-SOLiD data.

**Supplementary Figure 12.** SNP prediction using SQRL tags.

**Supplementary Figure 13.** The proportion of tags mapping across the deciles of Refseq transcript length.

**Supplementary Table 1.** The number and volume of sequences comprising the individual and composite libraries.

**Supplementary Table 2.** Anti-sense junction counts as a metric for directionality.

**Supplementary Table 3.** URLs of wiggle plots and BED tracks to visualize SQRL data of ES and EB cell state transcriptomes.

**Supplementary Table 4.** Number and proportion Refseq loci identified by SQRL.

**Supplementary Table 5.** Quantitative RT-PCR results.

**Supplementary Table 6.** Statistically significant differentially expressed genes.

**Supplementary Table 7.** Identification of full length transcripts by diagnostic sequences.

**Supplementary Table 8.** Volume and proportion of the mouse genome that falls into the known and predicted regions of transcription defined in Table 1.

**Supplementary Table 9.** Number and proportion of repeat associated tags detected in SQRL libraries, broken down by type of repeat.

**Supplementary Table 10.** Analysis of natural sense-antisense transcript pairs in ESC and EB.

**Supplementary Table 11.** Exon-junction discovery in SQRL ESC and EB libraries.

**Supplementary Table 12.** Single nucleotide polymorphism (SNP) detection in ESC and EB samples.

**Supplementary Table 13.** Summary of SNP validation results.

**Supplementary Table 14.** Summary of variants isolated from the SQRL data from pathways involved in ESC pluripotency and differentiation.

**Supplementary Table 15.** Details of splice-variants isolated from the SQRL data from pathways involved in ESC pluripotency and differentiation.

**Supplementary Table 16.** Primers used for experimental validation in this study.

**Supplementary Methods**

# Supplementary Figure 1.

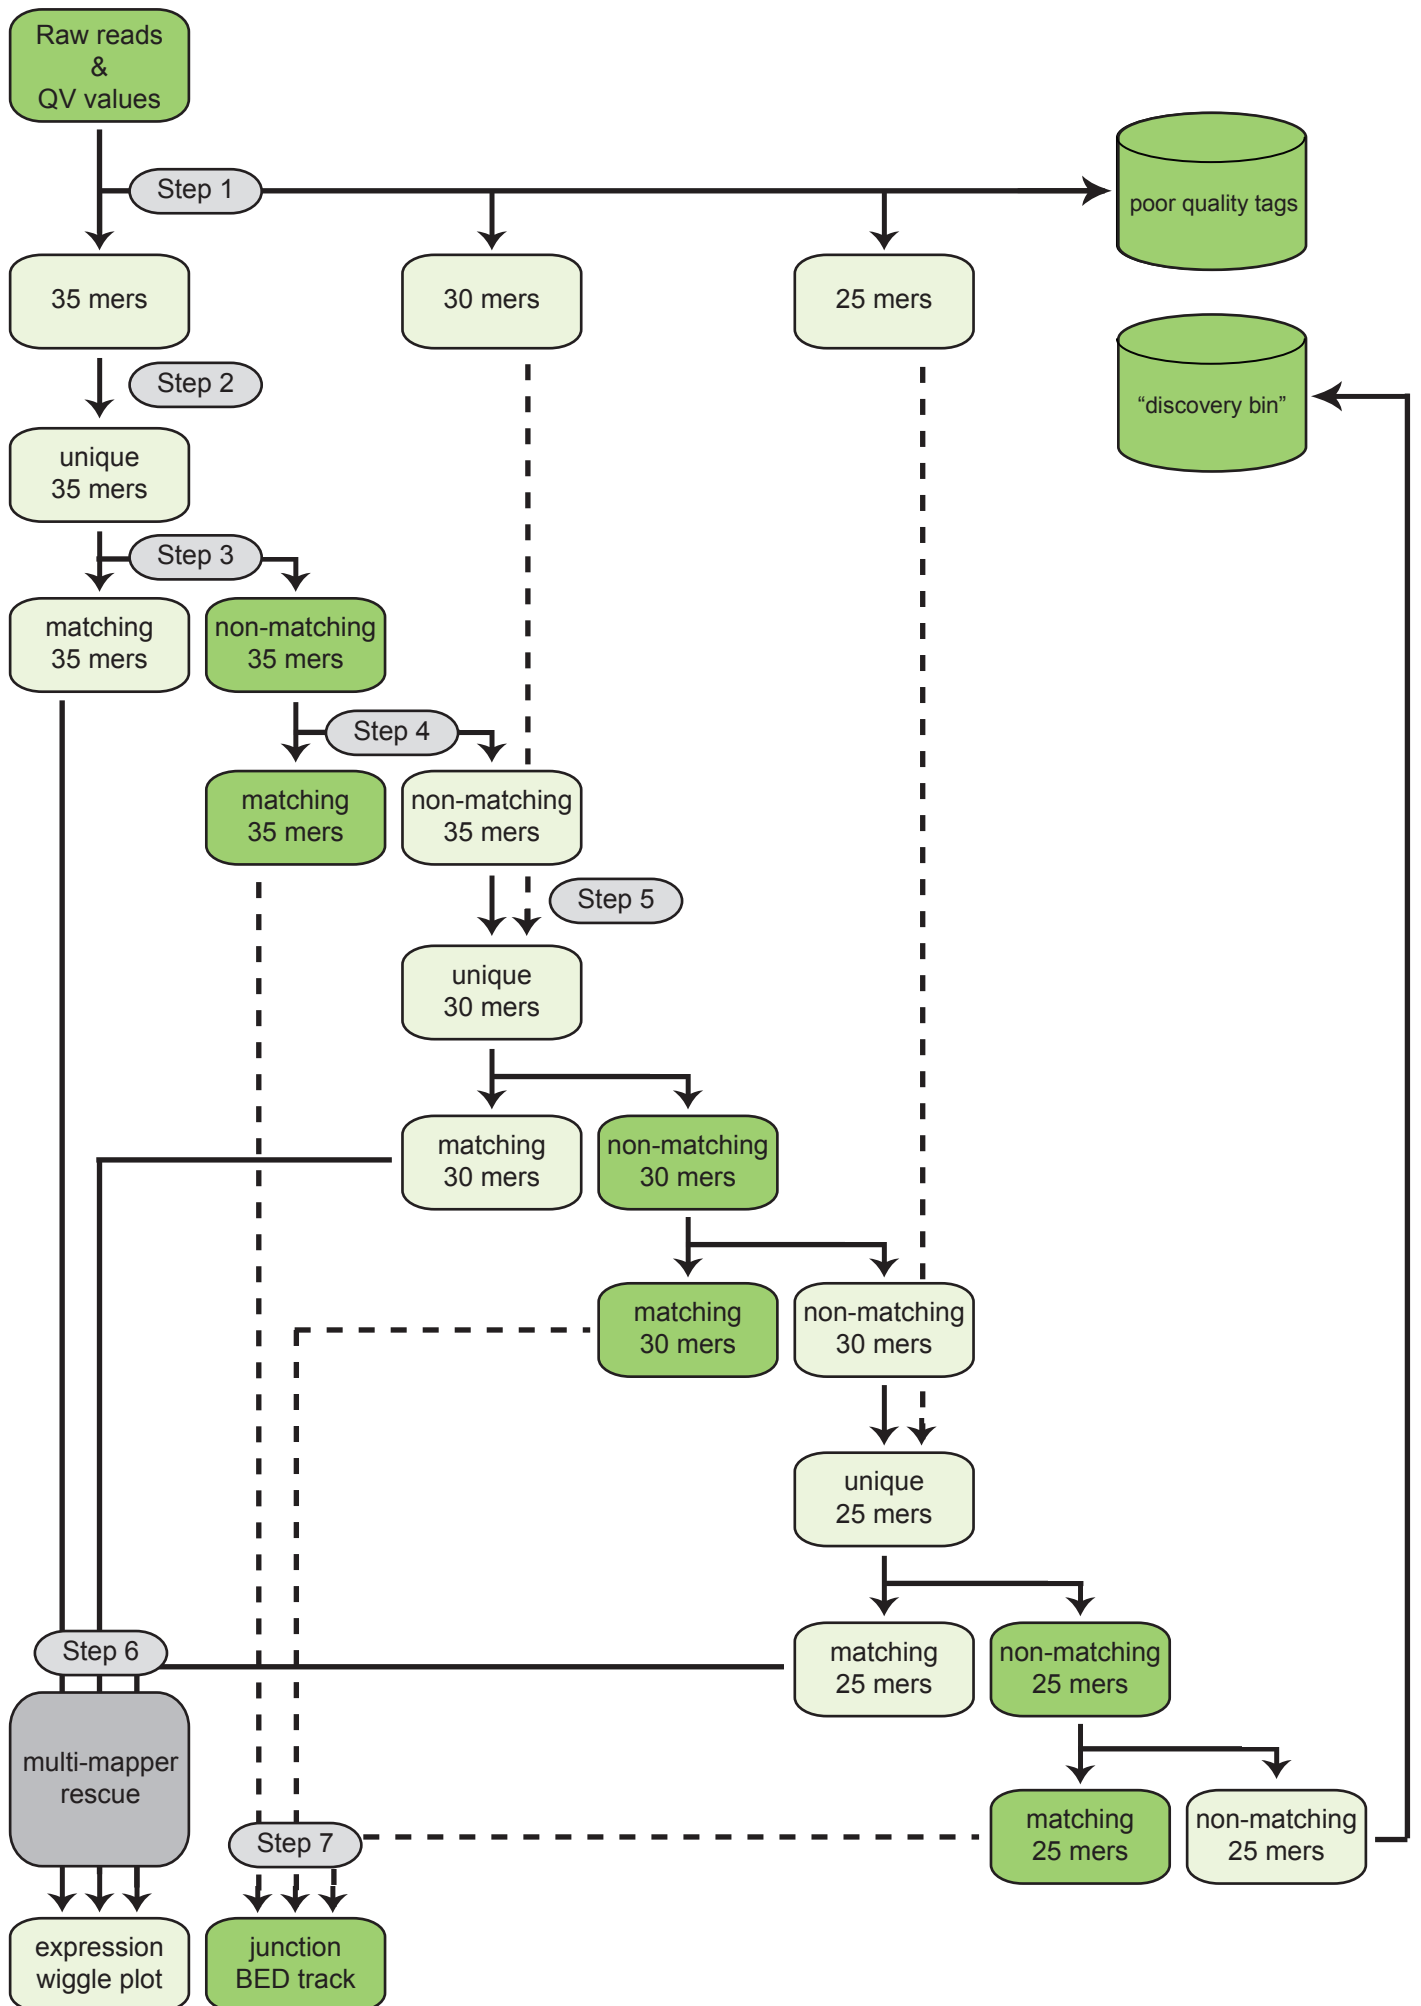

**Supplementary Figure 1.** Mapping strategy for SQRL gene expression data. Step 1: Sort tags by their raw quality scores (Phred scores). Tags were considered high quality if less than 5 bases were called with a Phred score of less than 10. If a tag was not considered high quality, the last 5nt were removed, and the tag was re-assessed. Tags that were considered poor quality at 25nt were discarded. Step 2: 35mers were clustered and condensed to unique tags, retaining tag frequency information. Step 3: Unique 35mers were mapped to the mm9 genome, with at most 3 colour-space mismatches. The SOLiD sequencing system measures the relationships between nucleotides (referred to as colour-space), rather than the nucleotides directly (base-space). Because any individual nucleotide has two relationships, one to the preceding nucleotide, and one to the subsequent nucleotide, every base-space nucleotide position is measured twice. All mapping is carried out in colour-space, allowing up to 3 colour-space mismatches. This equates to at most 2 adjacent base-space mismatches between the tag and the reference. Tags mapping to more than 100 genomic locations were discarded. Step 4: 35mer tags not mapping to the genome were mapped to the informative junction library – a set of sequences where the 30nt donor and 30nt acceptor sequence both match the genome individually (but not together), and also don't match with another junction within the library. Step 5: The last 5nt were removed from tags not matching the junction library, and combined with sequences that were considered good quality at 30nt. Steps 2-5 are repeated for 30mers and 25mers. Tags that do not map to the genome at 25mers are potential candidates for novel junctions. Step 6: Genome mappings for 35, 30, and 25mers are sorted into single-mappers (SiMs) or multi-mappers (MuMs), based on the number of times a tag maps at its highest stringency. (also see **Supplementary Fig. 2**). Wiggle plots for the positive and negative strand of each sample are created from this MuM-rescued data. Step 7: Junction mappings for 35, 30, and 25mers are sorted into single-mappers (SiMs) or multi-mappers (MuMs), based on the number of times a tag maps at its highest stringency. SiMs are used to create junction BED tracks for each sample. The proportions of single-mapping and multi-mapping tags at different lengths can be found in **Supplementary Fig. 3**.

## Supplementary Figure 2.

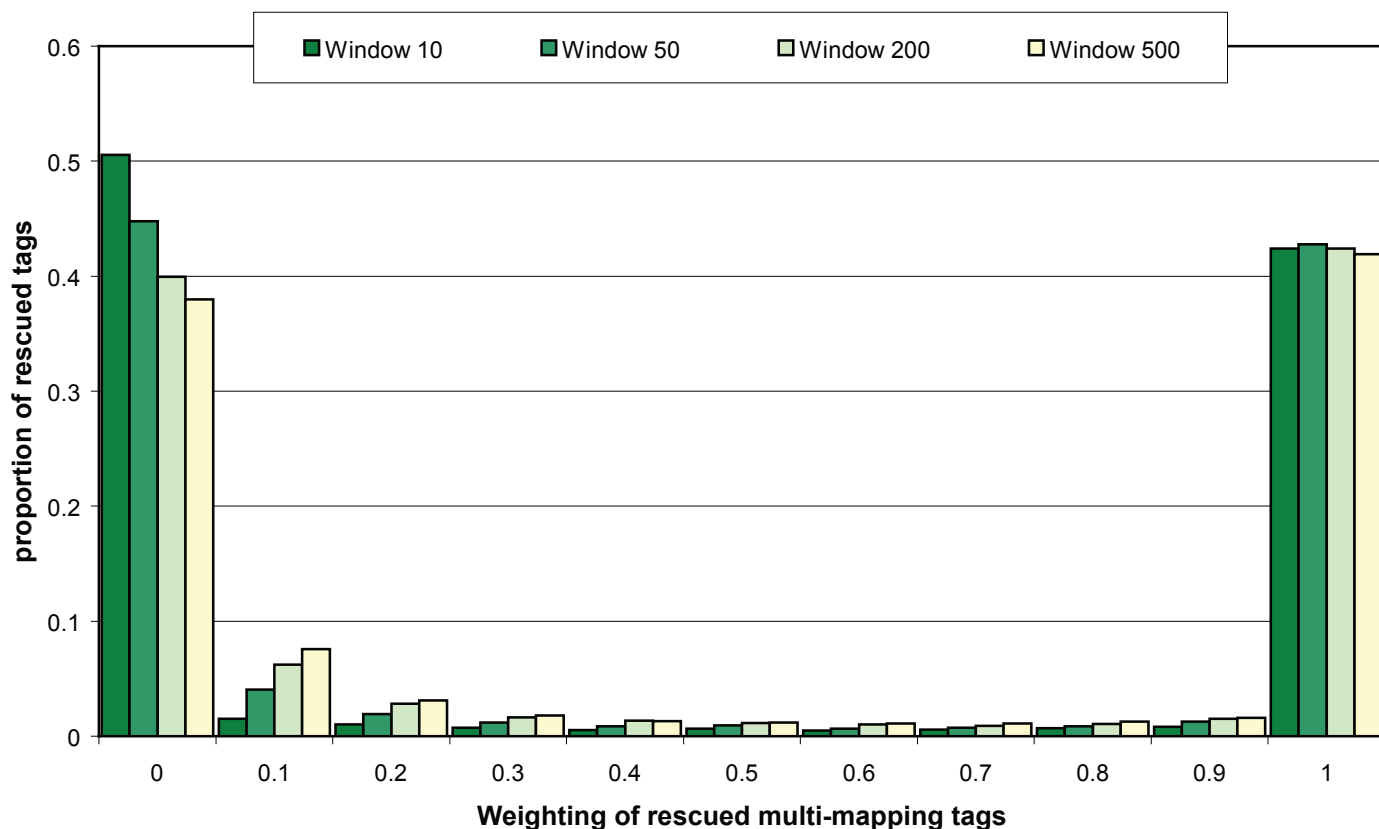

**Supplementary Figure 2.** Evaluation of MuM rescue of SQRL gene expression tags. MuMs are assigned to their most likely source probabilistically, based on a modified version of our previously described algorithm (Faulkner *et al* 2008). The use of different windows of expression surrounding each potential mapping site was investigated, finding that for SQRL gene expression data, small windows outperformed larger ones. Using a window of 10nt, more than 90% of MuM locations could be unambiguously assigned as either on (a weighting of 1) or off (a weighting of 0). Weightings for each MuM location are multiplied by the frequency of the MuM tag in the SQRL library to obtain a final tag count for mapping at that position.

# Supplementary Figure 3.

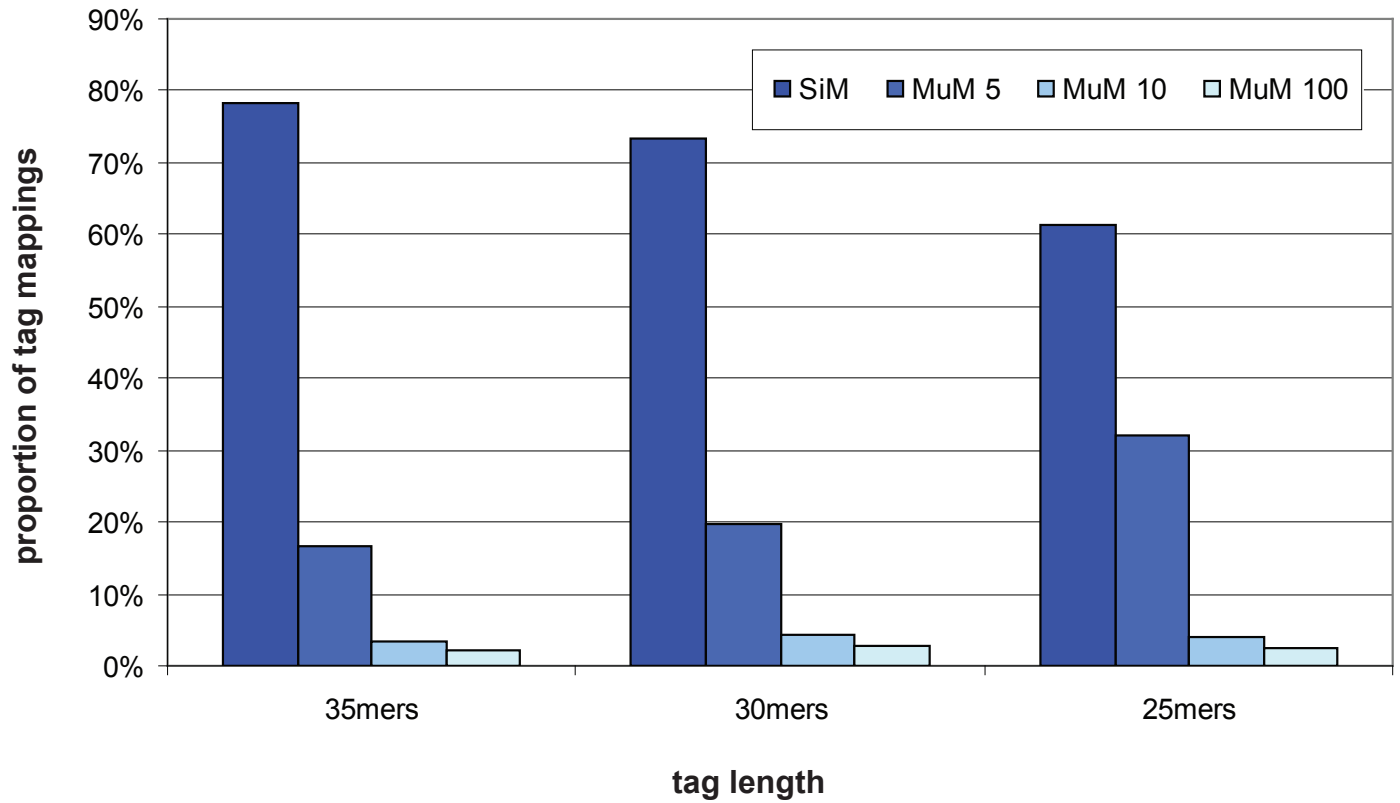

**Supplementary Figure 3.** Tag matching at multiple stringencies. Distribution of tags which are map uniquely (SiM), <5 times (MuM 5), <10 times (MuM 10) or <100 times (Mum) at mapped as 35mers, 30mers and 25mers (with up to 3 mismatch in colour space). There is only a slight increase in the mismatch rate when mapping at 25mers.

## Supplementary Figure 4.

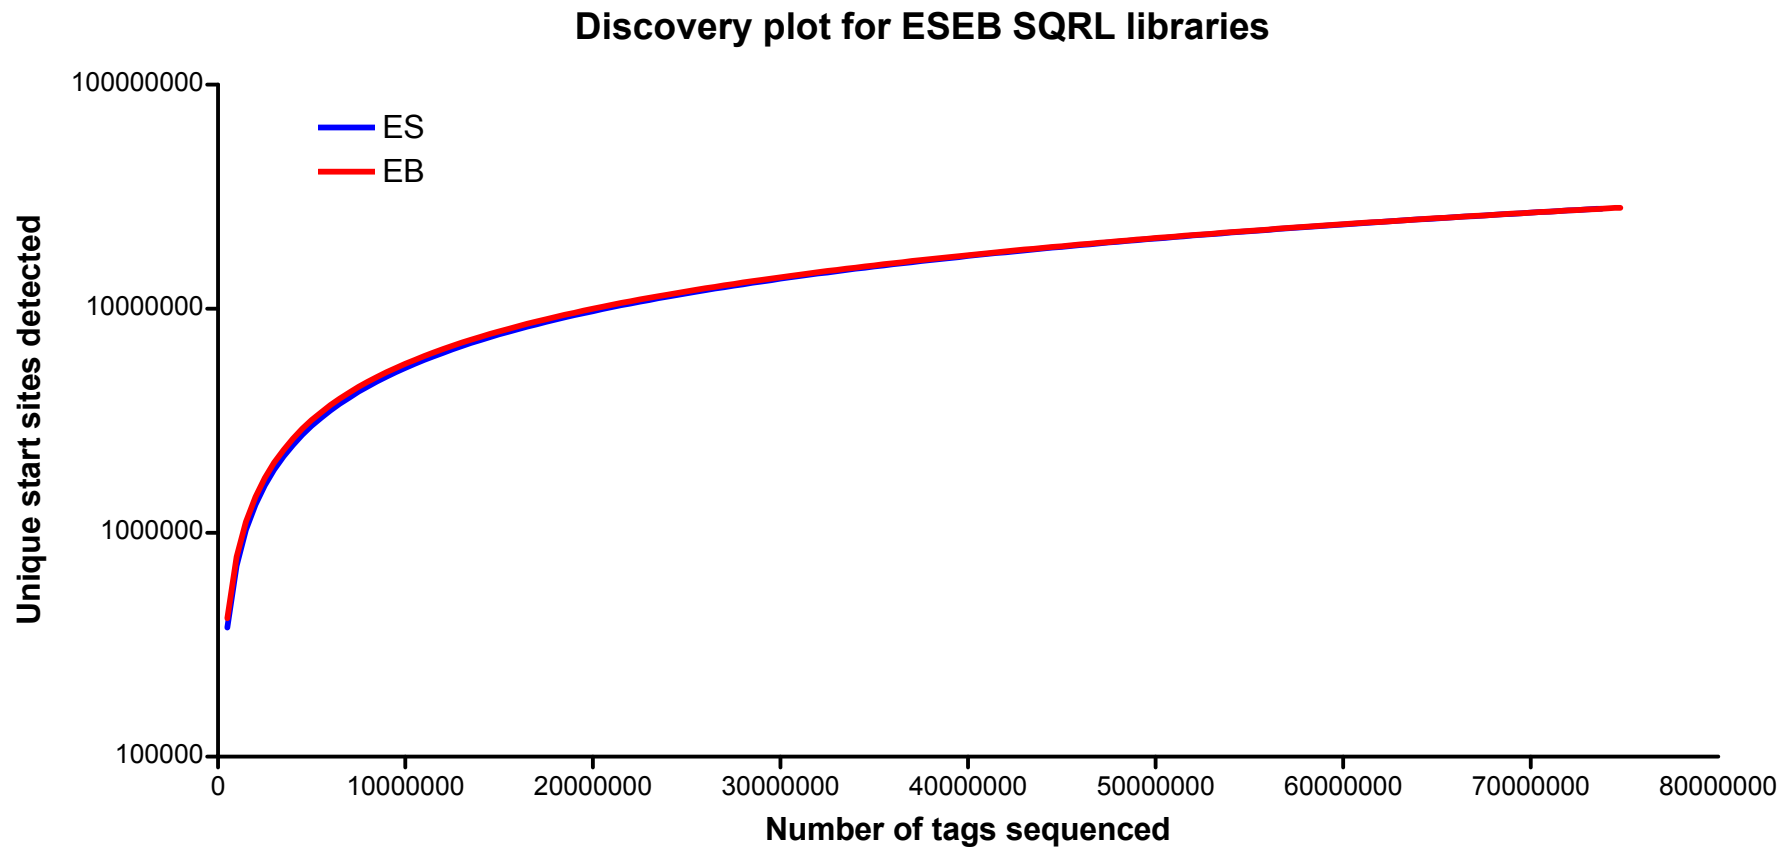

**Supplementary Figure 4.** Cumulative discovery plots of ESC and EB sequencing libraries. All single-mapping tags (either because they map once at their highest stringency, or because the multi-mapping rescue algorithm is able to unambiguously map them) of any length were randomly selected and the cumulative number of unique start sites was determined. This graph clearly shows that at this depth of sequencing, the number of unique start sites discovered has reached a plateau.

# Supplementary Figure 5.

35nt tags (all tags)

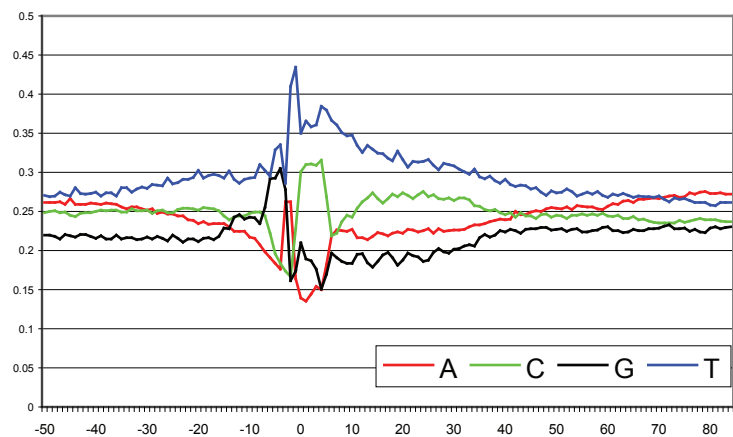

35nt tags (unique tags only)

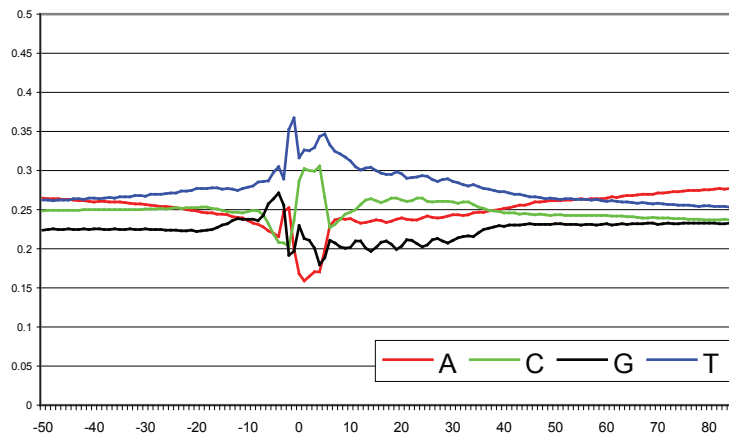

30nt tags (all tags)

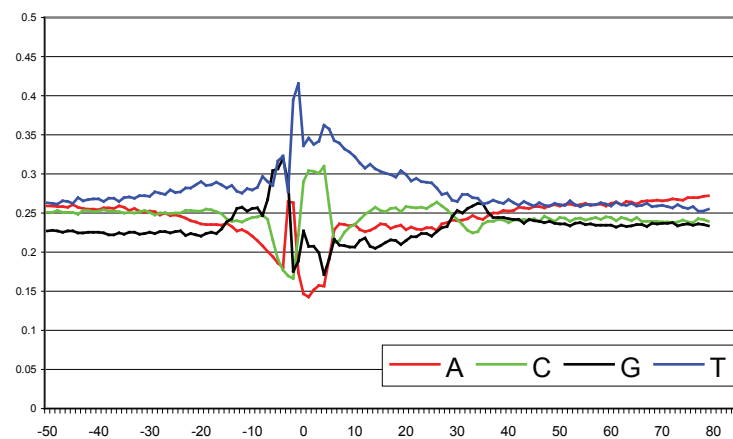

30nt tags (unique tags only)

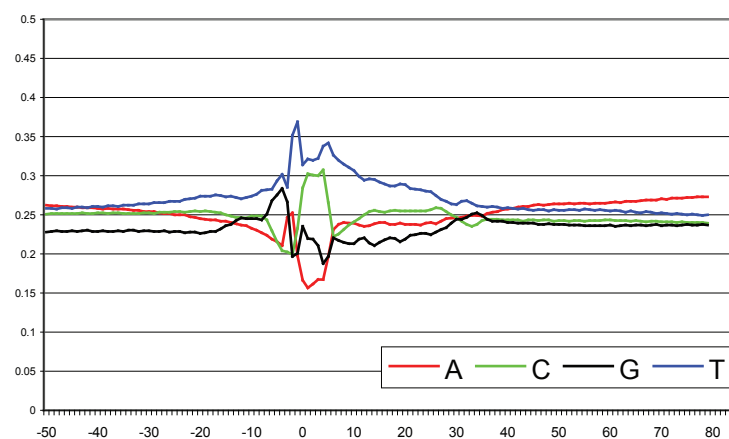

25nt tags (all tags)

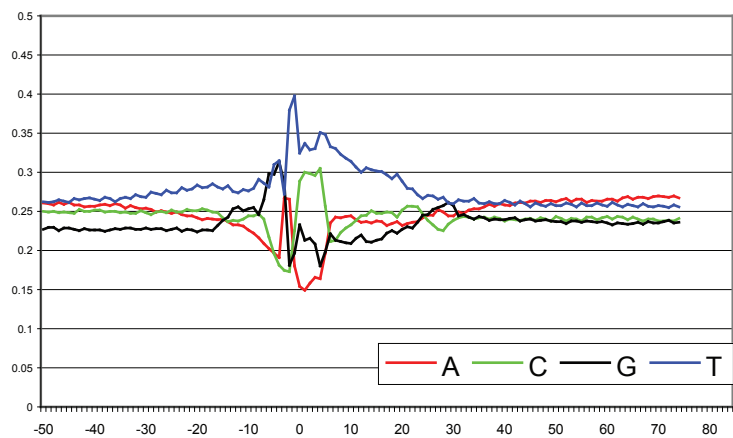

25nt tags (unique tags only)

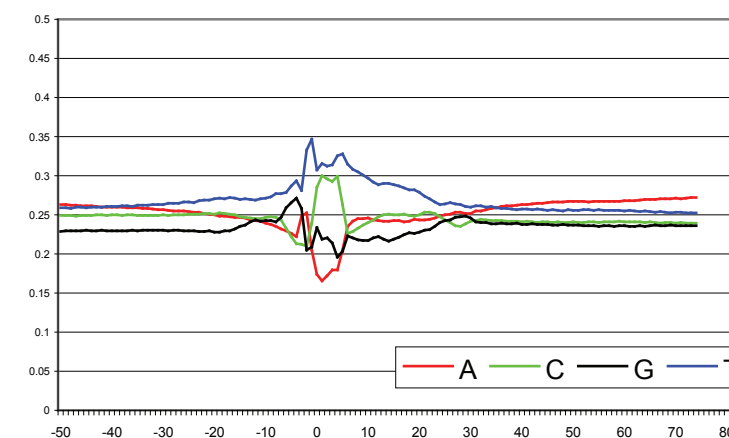

**Supplementary Figure 5.** Tag bias by sequence content. All tags were matched to the genome and the ratios of A, C, G and T were calculated for each position relative to the tag. 1 indicates tag start, negative numbers are derived from genomic sequence upstream of the matched tag and positive numbers represent the tag and downstream sequence. Plots show that the type of bias is similar at the 3 matching lengths, and only differs in magnitude in a comparison between all tags and those derived from unique start sites. The major source of bias occurs at -3 to 1 and 0-5 which is likely to represent bias in the random-hexamer FDV primer.



# Supplementary Figure 6a.

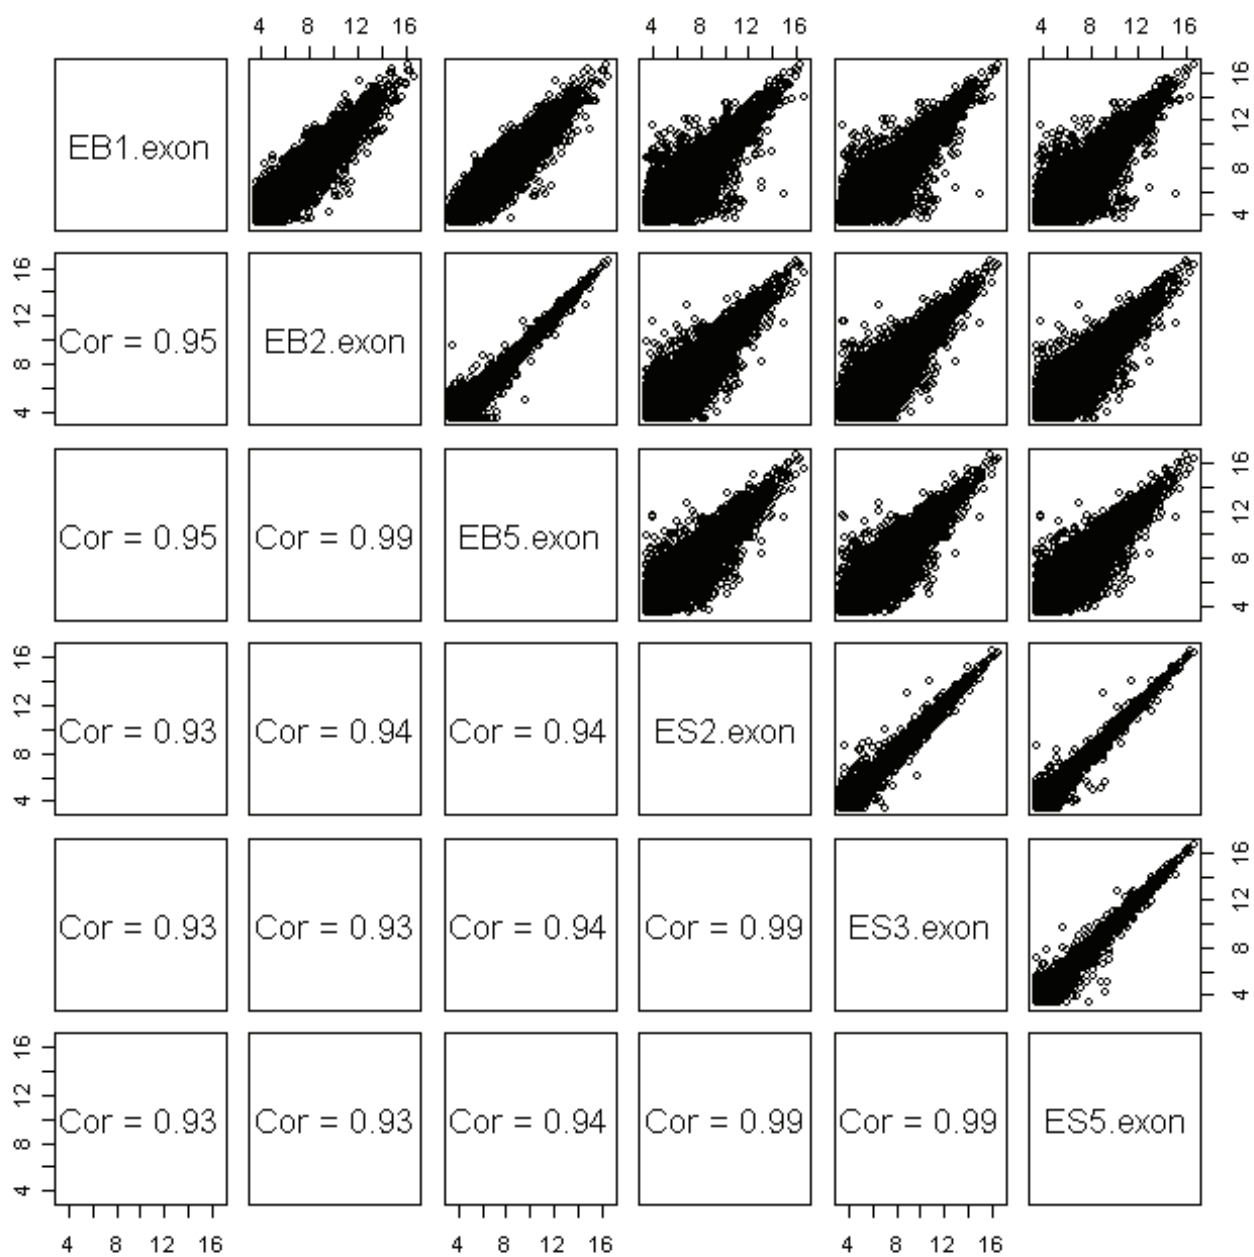

## Supplementary Figure 6b.

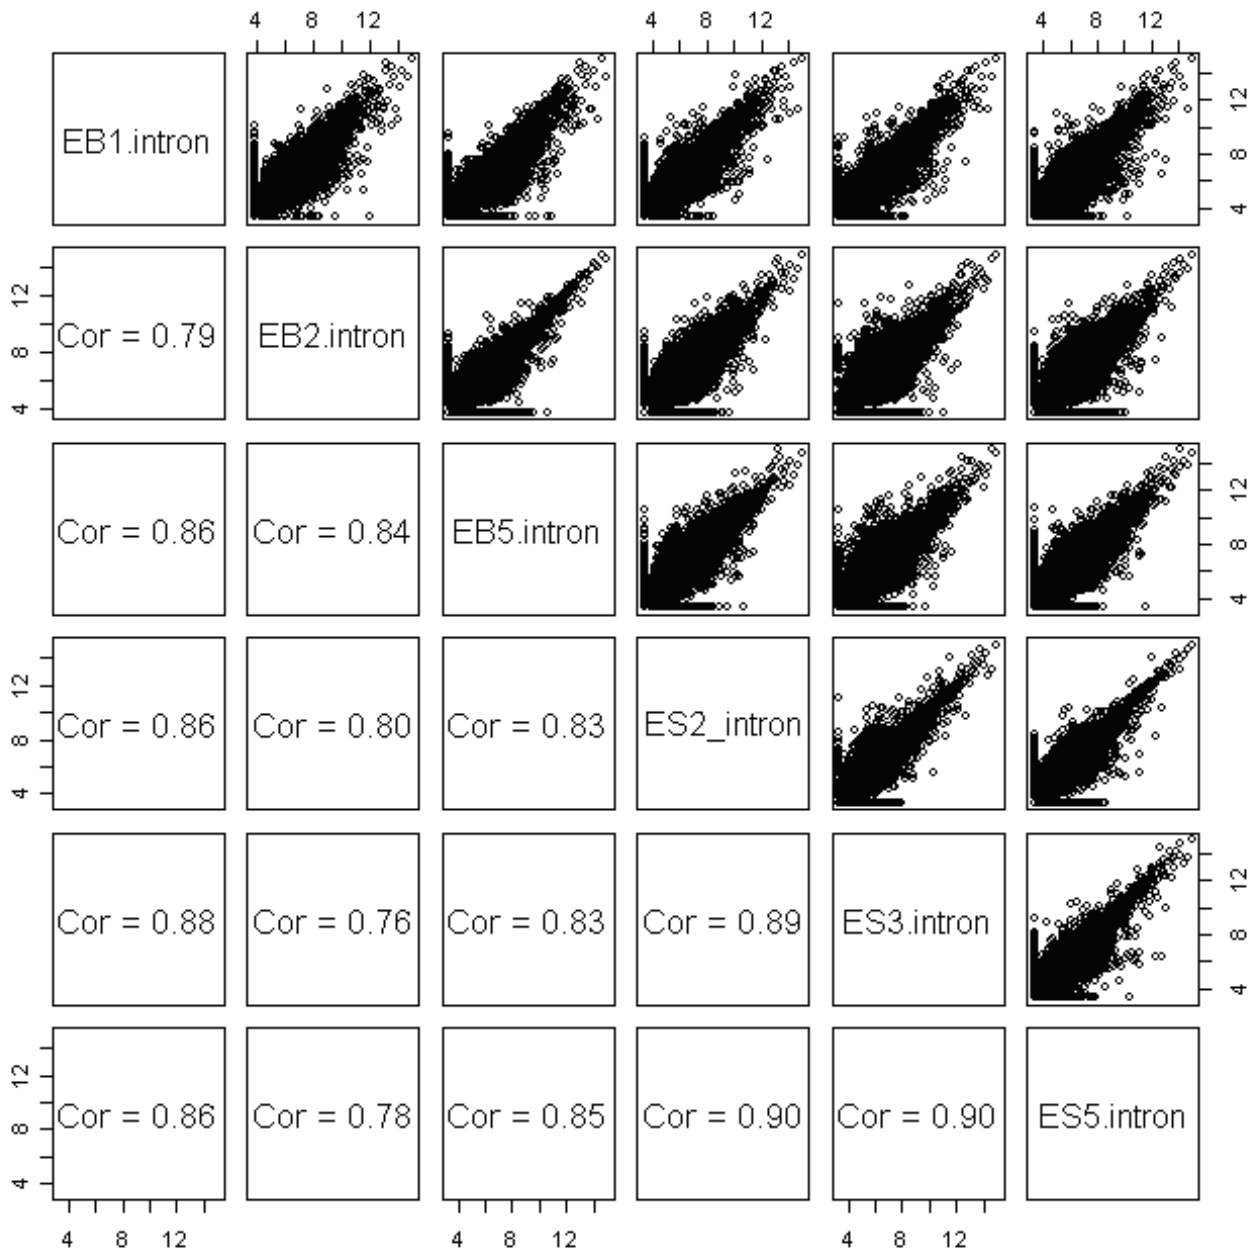

**Supplementary Figure 6.** High level of correlation for SQRL libraries. Correlation pairs plot showing relationship between Refseq transcripts (19,005 genes) compared by exons (a) and introns (b). Each scatter plot above the diagonal shows the relationship between individual libraries (as named on the diagonal). The Pearson correlation for each library comparison is shown below the diagonal. The X and Y axis are normalised  $\log_2$  (tag count).

# Supplementary Figure 7.

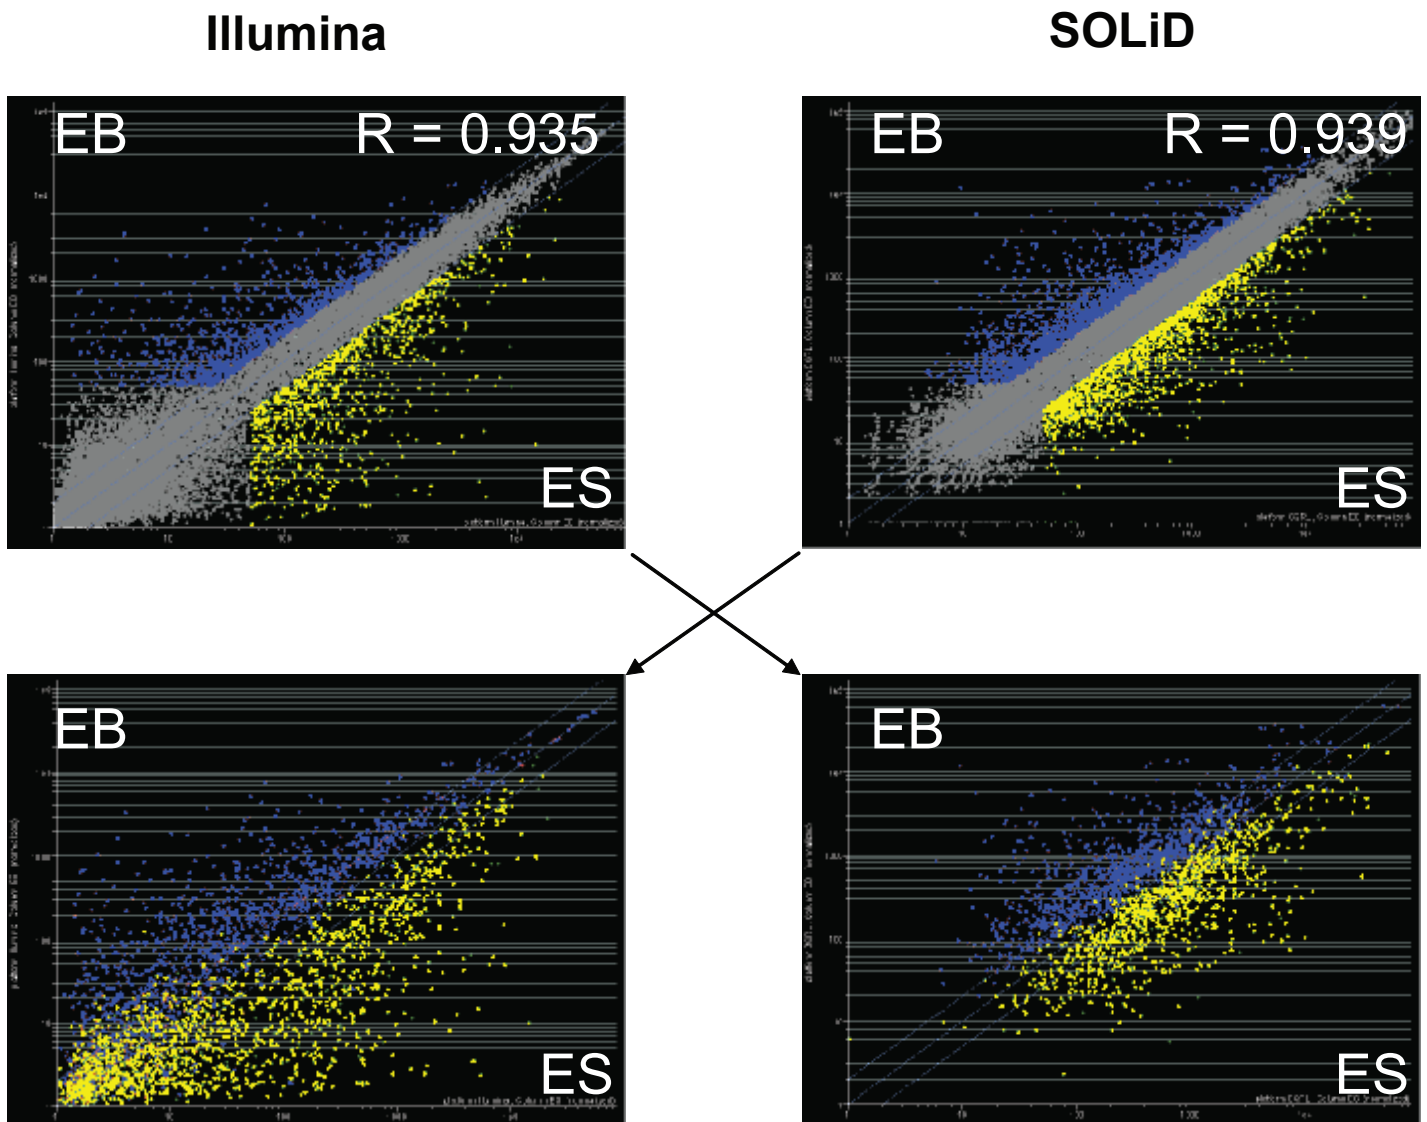

**Supplementary Figure 7.** Strong concordance between SQRL-SOLiD and Illumina in the detection of differential expression. Top panel: Differentially expressed genes were coloured on the correlation scatter plot for Illumina (blue: gene present or marginal in ESC or EB and  $> 2$  fold up-regulated in EB; yellow: gene present or marginal and  $> 2$  fold up-regulated in ES) and SQRL-SOLiD (blue: gene  $> 50$  counts [normalised] and  $> 2$  fold up-regulated in EB; yellow:  $> 50$  counts and  $> 2$  fold up-regulated in ES). Pearson correlation for each comparison is shown (17,325 genes total). Lower panel. Genes  $> 2$  fold in Illumina or SQRL-SOLiD experiment overlaid onto the converse scatter plot. Trend of differential expression is consistent between Illumina and SOLiD, except for low expressing genes. Note that many genes above detection and up- or down-regulated by SQRL-SOLiD are below detection level on the Illumina array.

## Supplementary Figure 8.

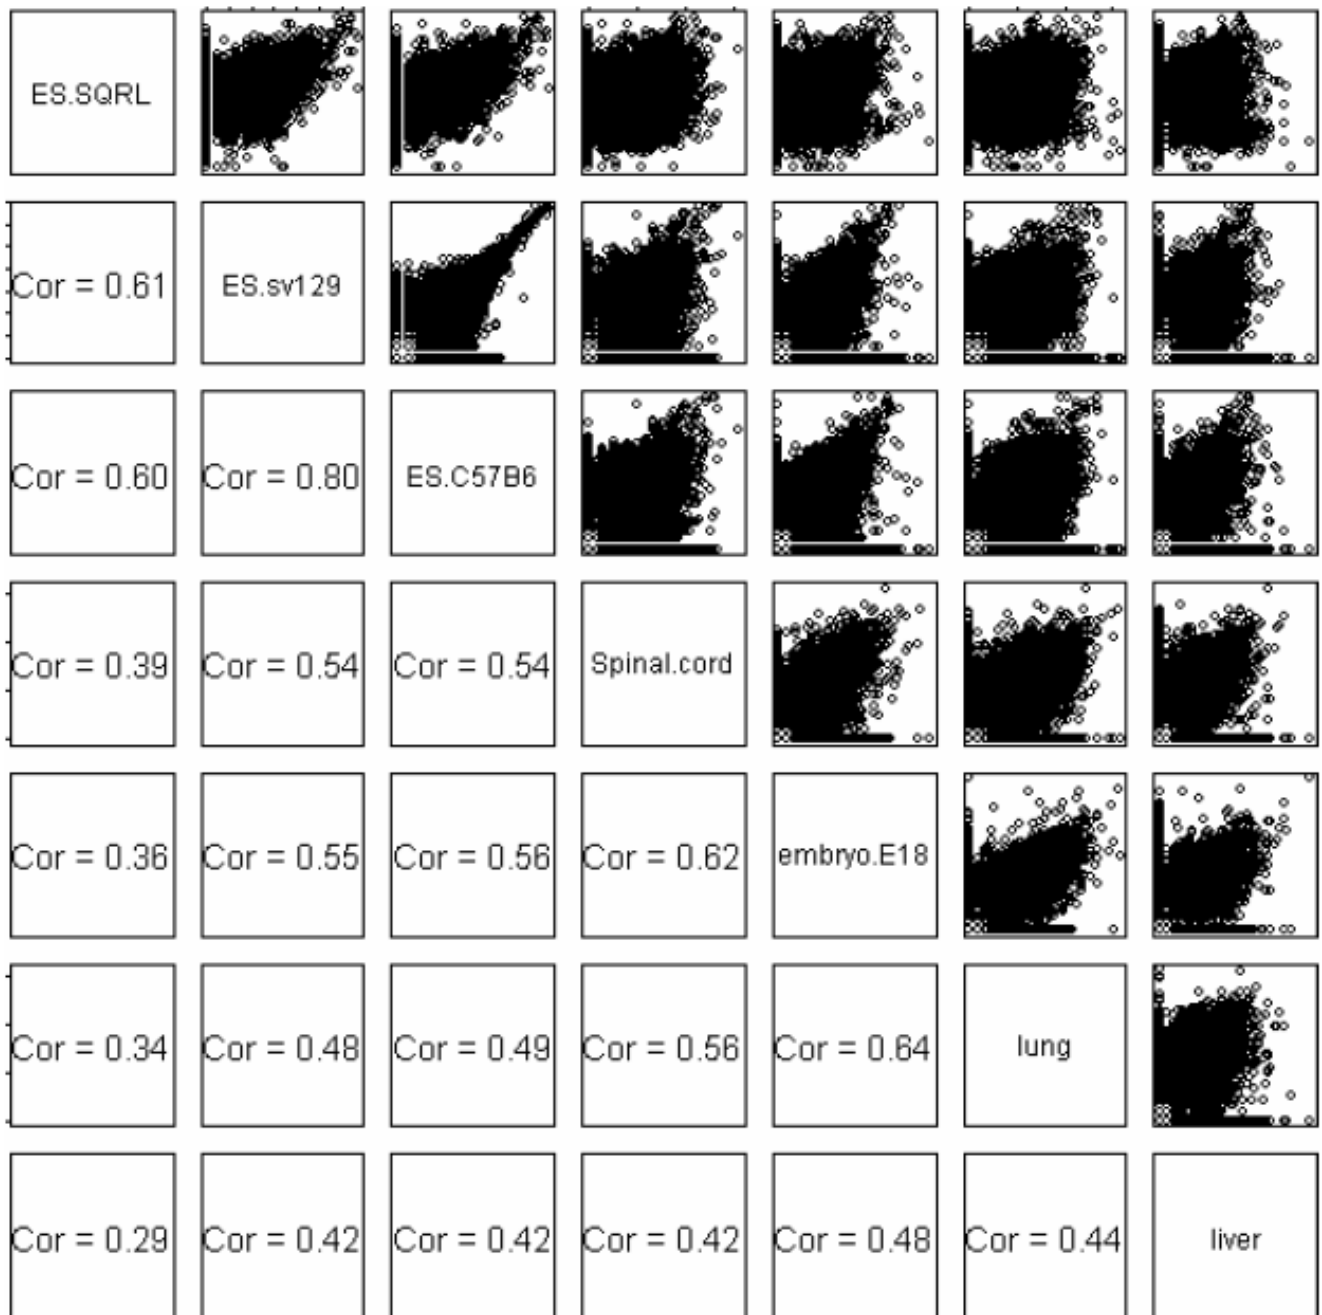

**Supplementary Figure 8.** Comparison to the MPSS files line from the mouse transcriptome project. To determine correlation with existing data, SOLiD sequencing of ESC was compared to MPSS data (mouse transcriptome project, <http://www.ncbi.nlm.nih.gov/geo/info/mouse-trans.html>). Tag signature sequences from MPSS (GEO:GPL1010) were matched to all Refseq sequences using Vmatch. Those which matched to the unique Refseq set (19,005) were filtered. Any tags that matched to more than 1 unique Refseq as an ambiguous MPSS were excluded. Doing this, there was MPSS evidence for 14,579 genes from the 19,005 gene starting set. Note, the major MPSS tag for a given gene may be excluded if this tag is ambiguous. For each MPSS sample in the mouse transcriptome project, signal was determined by the raw number of counts for a given gene. For the 14,579 gene set, the correlation of these genes between the SOLiD ESC sample and each MPSS sample was determined by using Pearson correlation on the raw data signal, using the Cor function in R. Most striking is the correlation between SOLiD ESC and the MPSS SV129 ESC sample (0.65), and to C57BL6 (0.63) and correlation to other samples is lower than 0.4, showing good specificity for “stemness”.

## Supplementary Figure 9.

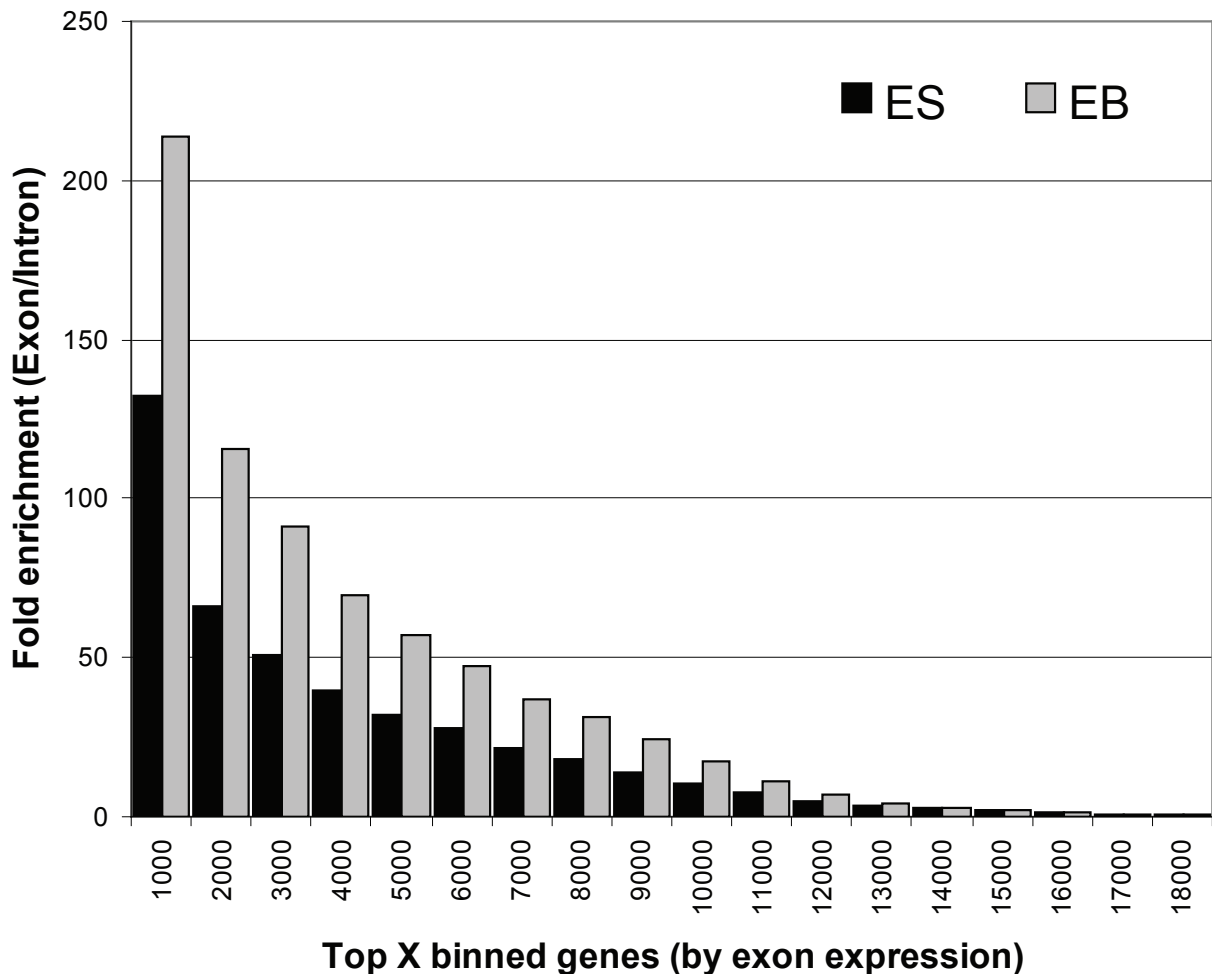

**Supplementary Figure 9.** Enrichment of exon versus intron expression for detected Refseq genes. To determine the extent of intron-retention events or genomic DNA contamination in our sequencing results, we computed the difference between expression of exonic sequence versus the surrounding intronic sequence. We would expect that the majority of expression is within known exons, and we therefore an enrichment of exon expression. Representative Refseq genes with tag counts of 50 or more were selected for this analysis (11,669 genes for ESC and 11,621 genes for EB). Expression for exons was determined by summing all tags matching to a Refseq and dividing this number by the length of the transcript. This gives a per-base score (i.e. the average number of tags starting at each nt within the transcript). The same score is calculated for the tags matching to introns within a Refseq gene (total tags within introns / sum of intron lengths). For each gene, the enrichment score is: exon score/intron score. The mean enrichment for ESC was 48.7, and for EB was 62.1. To examine the proportion of enrichment in genes with differing levels of expression, the results were ranked, and then binned according to their expression.

# Supplementary Figure 10.

**a**

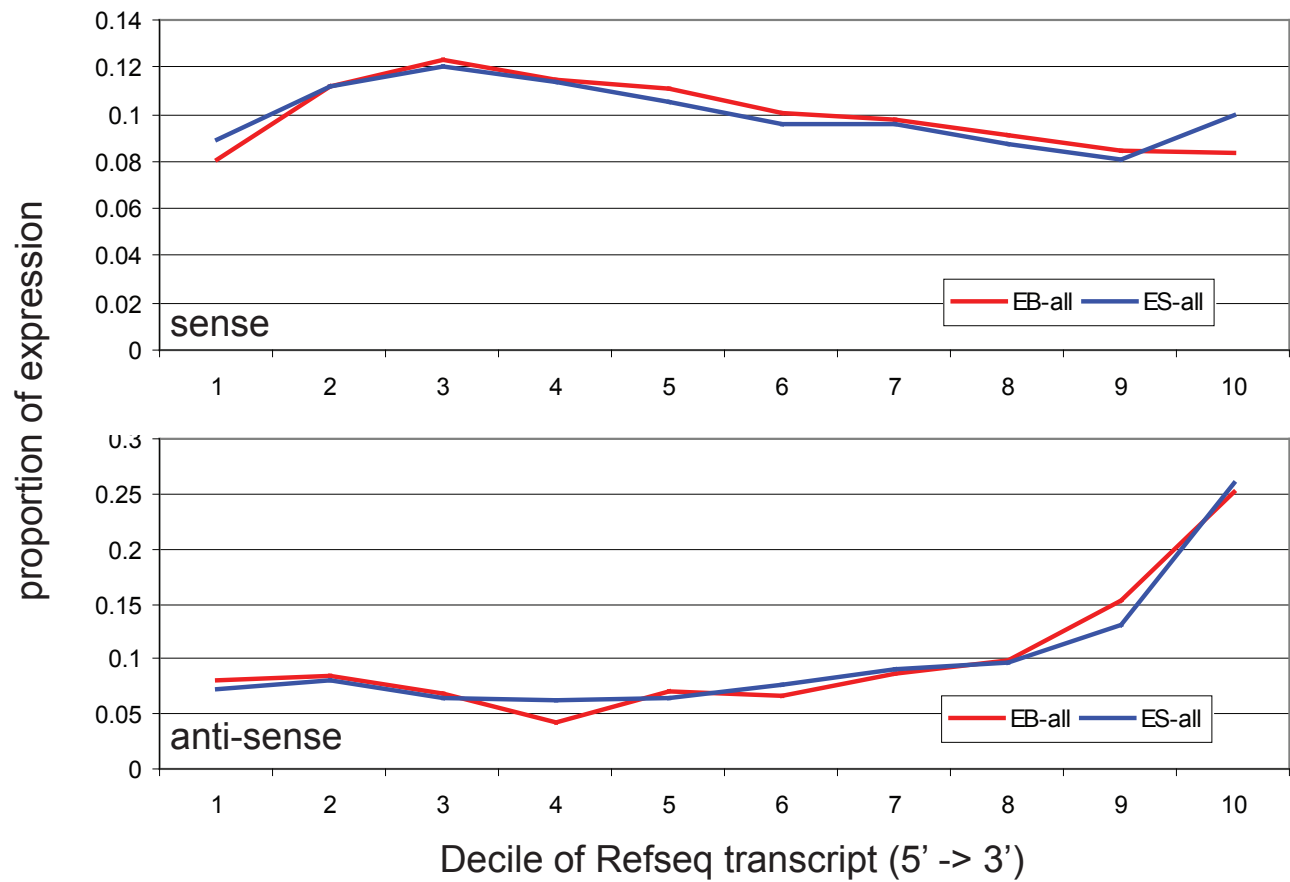

**b**

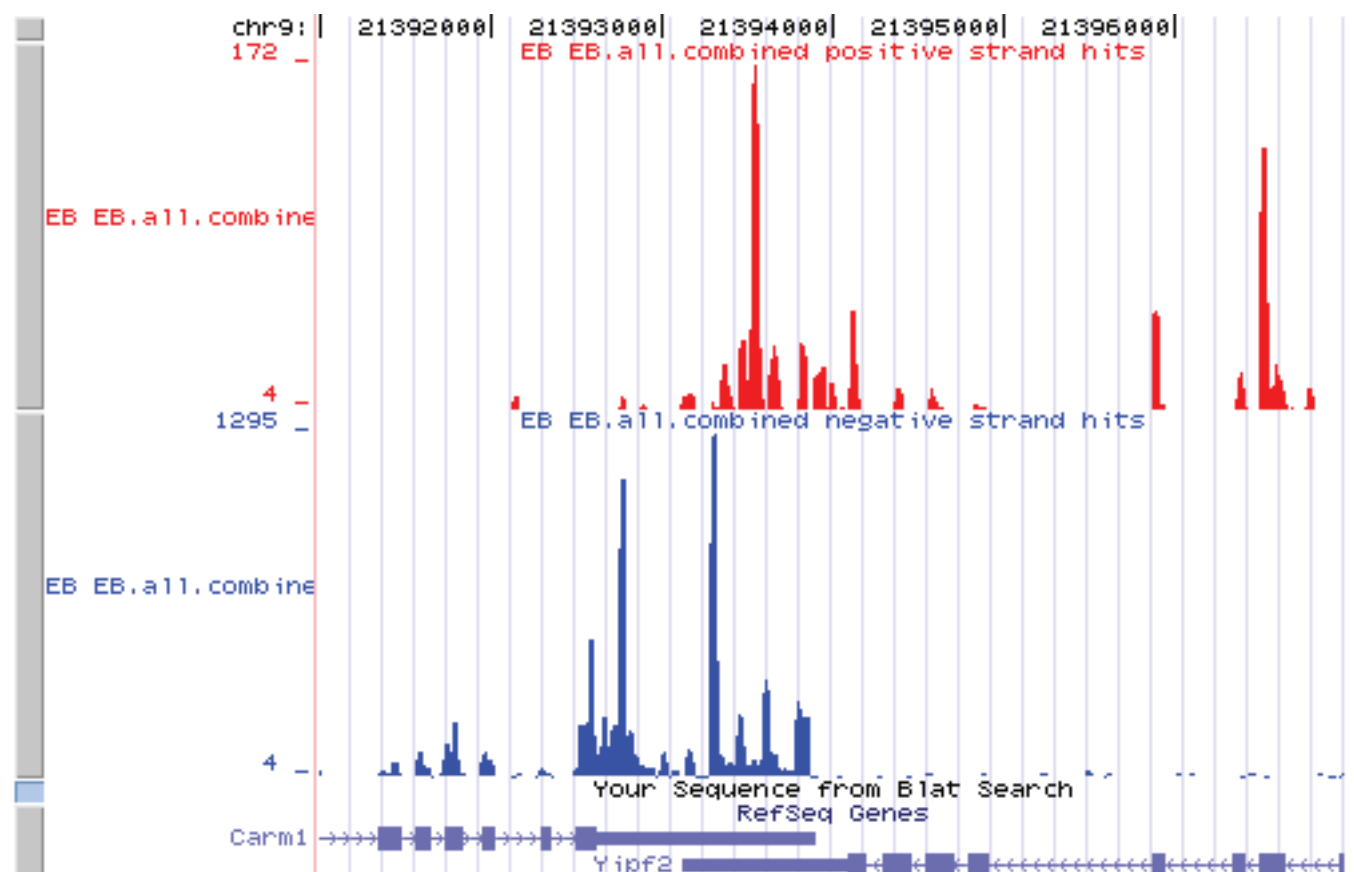

**Supplementary Figure 10.** Bias in tags across the length of transcripts. (A) Graph showing the percentage of filtered tags mapping to each decile of Refseq transcripts for sense strand (top panel) and the antisense strand (bottom panel). All tags were filtered to  $\geq 5x$  coverage, and anti-sense tags were additionally filtered proportionally for those  $\geq 1\%$  of the corresponding sense-expression (based on directionality of library described in supplementary Table S16). The top panel reveals no significant transcript bias (either 5' or 3') in the library synthesis, and demonstrates that this filtering does not change the bias from unfiltered data presented in Supplementary Figure S4. The bottom panel reveals that there is strong enrichment of antisense transcripts that map to the 3' ends of sense transcripts. Further analysis shows that these are likely due to a strong enrichment of convergent (tail-tail) natural sense-antisense transcripts in the polyA+ fraction of ESC and EB cells. (B) Example of a tail-tail natural sense-antisense transcript pair that is detected by SQRL-SOLiD, showing clear and specific expression in both strands where these two genes overlap.

# Supplementary Figure 11.

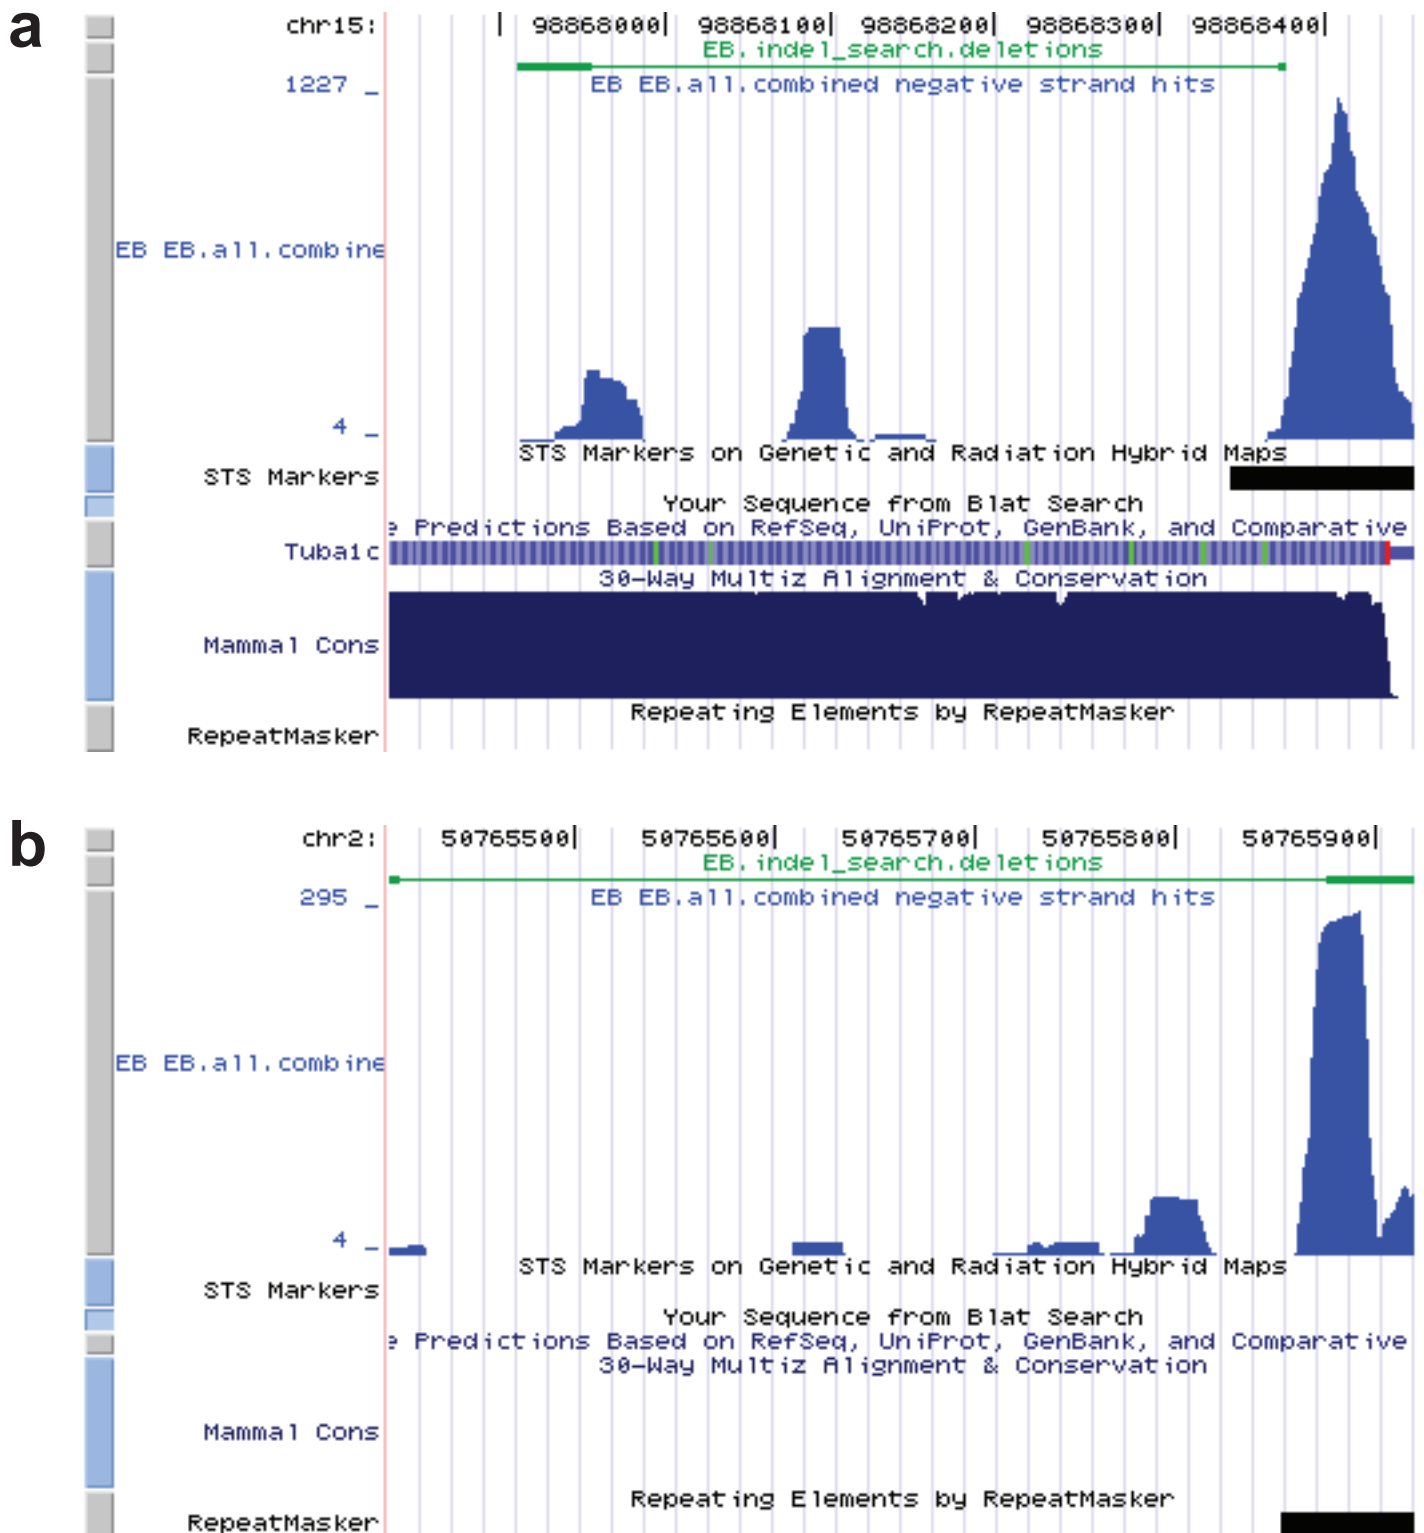

**Supplementary Figure 11.** Identification of putative alternative splicing in SOLiD-SQLiD data. Tags that previously did not match to the genome or junction library were clustered by VCAKE and clusters (>50nt) were mapped to the genome. Shown here are two examples of such clusters on the UCSC genome browser: (a) novel splicing within a known gene, *Tuba1c*; and (b) splicing within a novel gene. The cluster is represented by the green line, where the thick line on either end reveals the regions that the cluster maps to and the thin line is the region between these. Mapping of tags to the genome is shown in blue for completeness.



# Supplementary Figure 12.

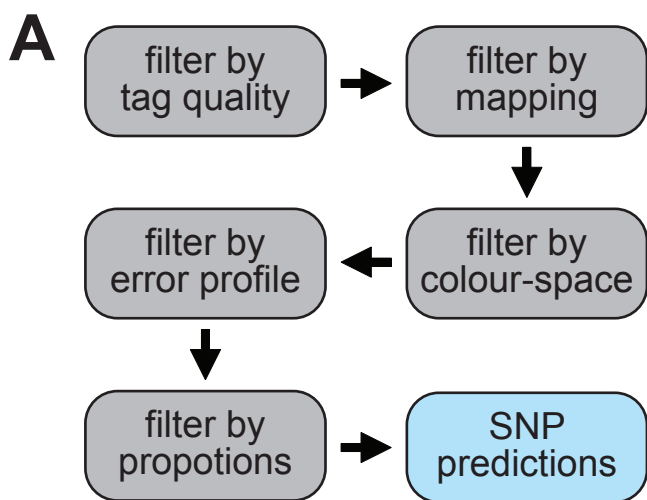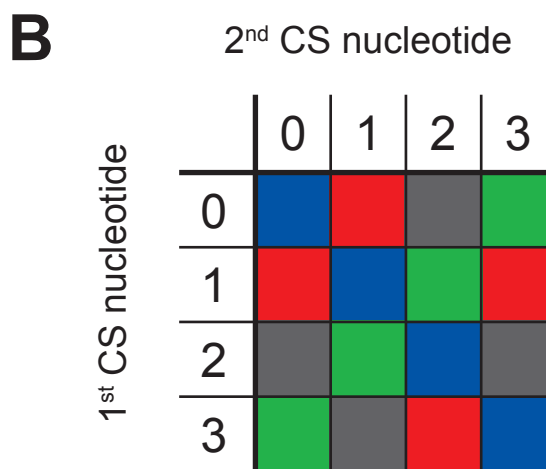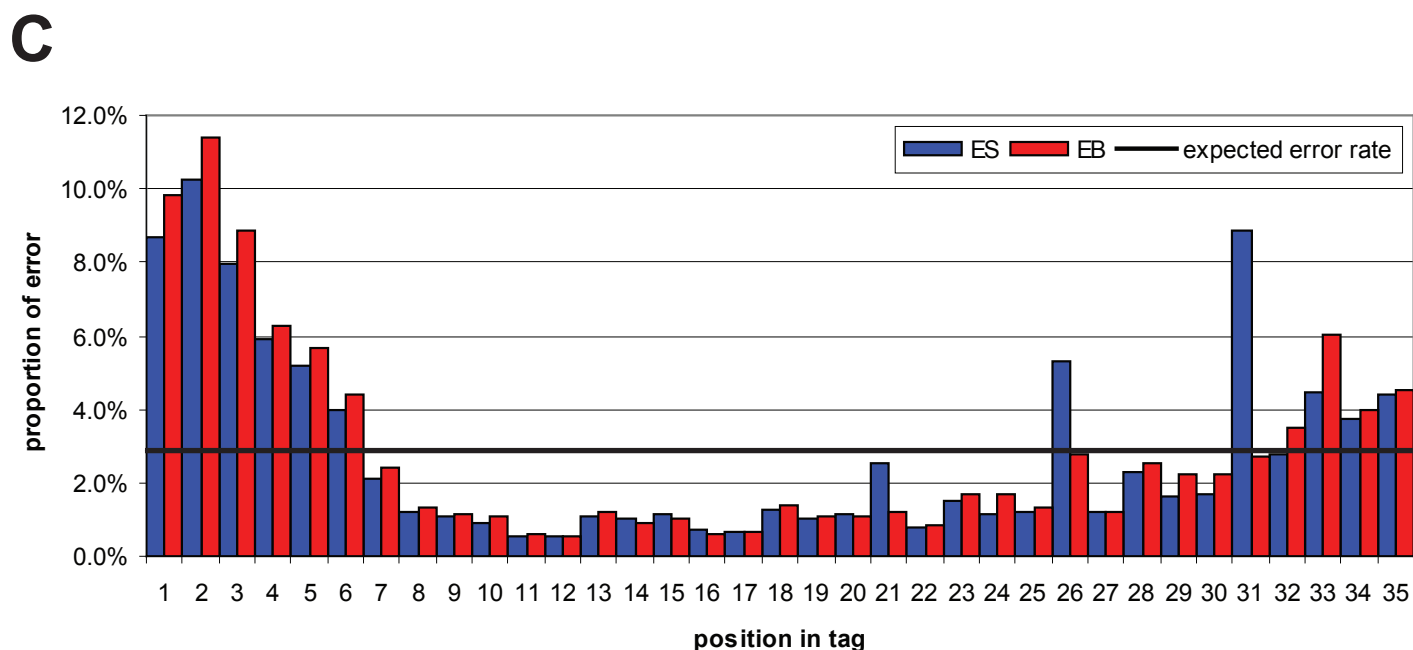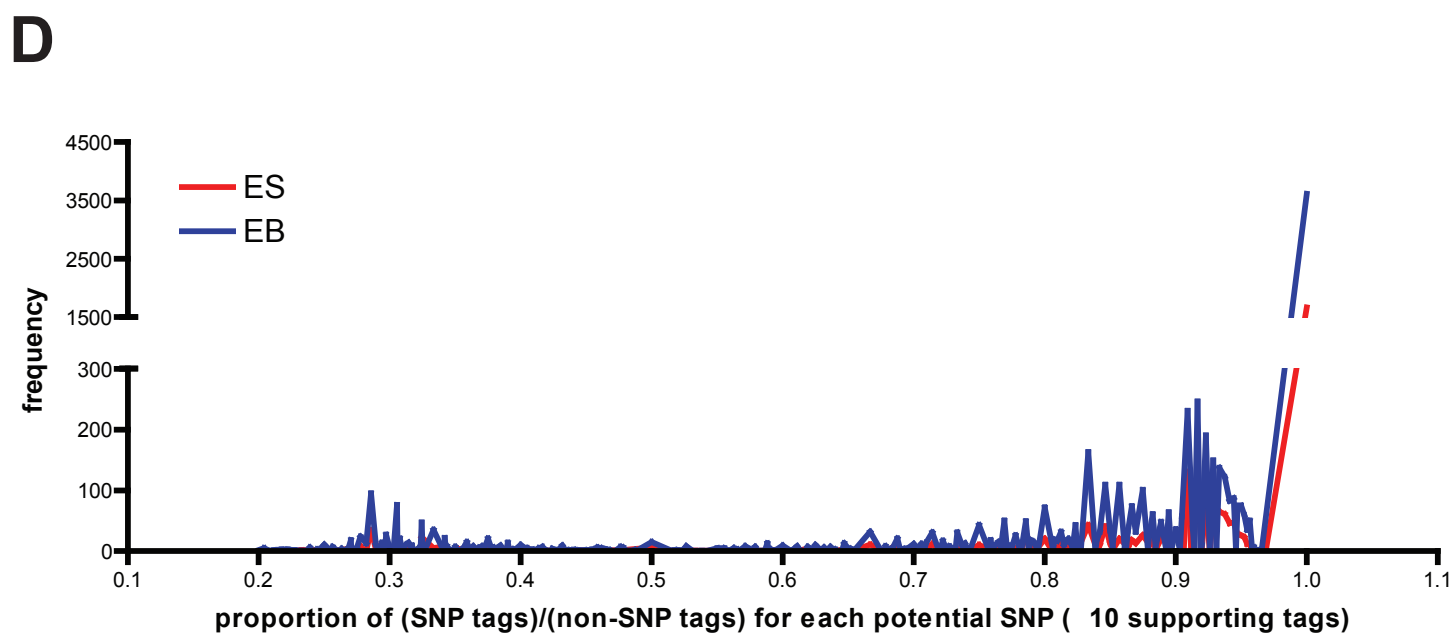

**Supplementary Figure 12.** SNP prediction using SQRL tags. (A) Extensive filtering is applied to the data before final SNP predictions are made. Firstly, tags must be full length (35nt) and must have passed QC (no more than 4 colour-space basecalls with Phred scores <10). Next, the data is filtered by mapping quality. No masks should be applied to the mapping, and no rescued multi-mapping tags are considered. The data is then filtered to by colour-space errors, which must be both adjacent and valid (see B). The data is then filtered by the error profile of the tags, only considering polymorphisms occurring in the reliable positions (see C). Finally, each polymorphism is filtered by both the number of unique independent tags (tags with independent start sites) supporting the potential SNP (a minimum 10 unique, independent tags are required), and by the ratio of tags that support the potential SNP to the number of tags that do not (see D). (B) Filtering by colour-space errors. SOLiD sequencing measures the relationships between nucleotides (referred to as colour-space), rather than the nucleotides directly (base-space). Because any individual nucleotide has two relationships, one to the preceding nucleotide, and one to the subsequent nucleotide, every base-space nucleotide position is measured twice. This means that for any nucleotide change in base-space, an accurate colour-space read of this requires two adjacent changes. Additionally, because there are only three base-space changes that can be made for any given nucleotide, and there are twelve possible colour-space changes, colour-space errors must be filtered by validity. Only changes within the same validity group maintain the integrity of the subsequent colour-space relationships when decoding from colour-space to base-space. For example, the only valid changes for a 00 colour-space di-nucleotide are 11, 22, and 33. All other adjacent colour-space errors are discarded. (C) Potential polymorphisms are discarded if they fall within an unreliable

position in the tag. Typically this includes the last 5nt of the tag, due to poorer sequencing performance and the presence of shorter inserts, and any individual positions that have performed poorly. For SQRL tags, this also typically includes the first 6nt, due to error introduced by priming with the random hexamer. The error profiles for the ESC and EB libraries are shown. Note particularly the increased error in the ESC library for position 26 which results in a reduction of the number of predicted SNPs from this data.

(D) Potential SNPs are discarded if the proportion of tags supporting a SNP is lower than 0.75X of the sum of tags supporting a polymorphism and tags that support no change. This is the smallest ratio possible before the SNP would be predicted to be heterozygous. As we would expect genuine SNPs from a cell line derived from an inbred mouse to be predominantly homozygous, SNPs below this ratio were discarded. Heterozygous SNPs or potential RNA editing events are likely to have a lower ratio. This graph shows the frequency of this ratio for the ESC and EB libraries, showing that the majority of potential SNPs are found above this cut-off.

# Supplementary Figure 13.

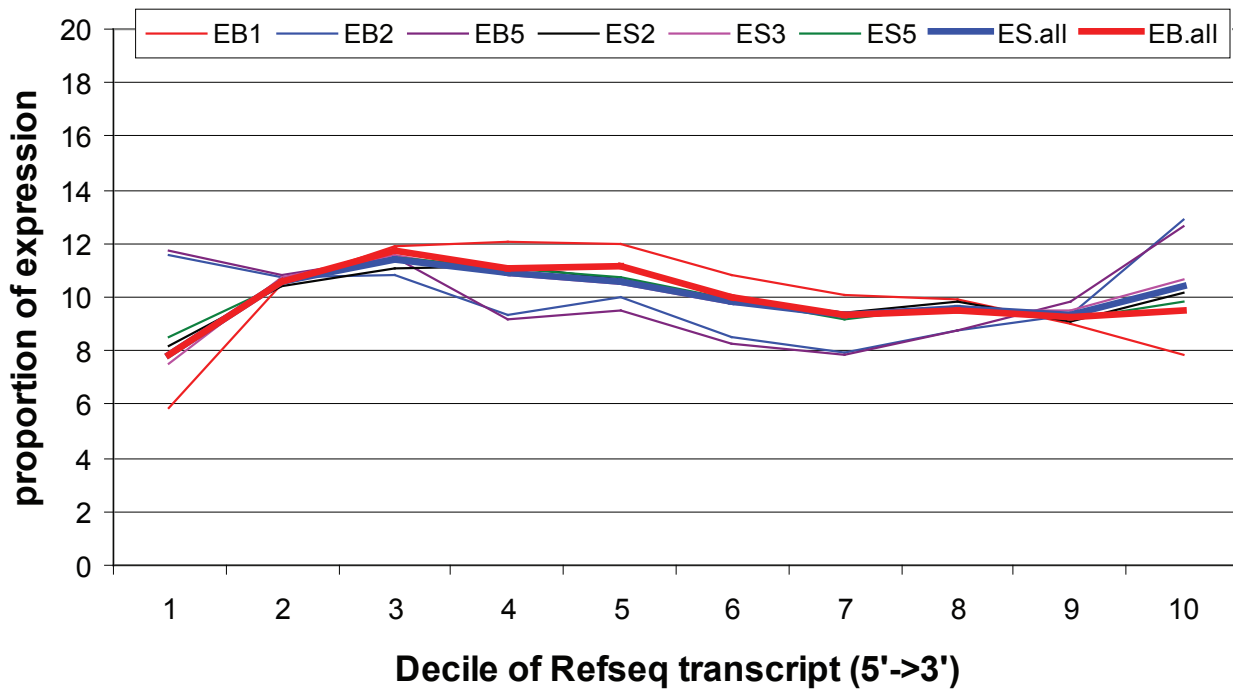

**Supplementary Figure 13.** The proportion of tags mapping across the deciles of Refseq transcript length, showing equitable distribution across the length of the transcript. Importantly, we do not observe an enrichment of extreme 5' ends, showing that the template-switch protocol does not favour capped RNA fragments.

**Supplementary Table 1.** The number and volume of sequences comprising the individual and composite libraries. Note that sequences mapping more than 100 times to the genome are not included in the mapping statistics, and only tags that map once at their highest frequency are included in the junction mapping statistics.

| <b>Sample</b> | <b>Library</b> | <b>Number (volume)<br/>good quality tags</b> | <b>Number (Volume)<br/>tags mapping genome</b> | <b>Number (Volume) tags<br/>mapping junctions</b> |
|---------------|----------------|----------------------------------------------|------------------------------------------------|---------------------------------------------------|
| ES            | ES-2           | 32233538 (1.00 Gb)                           | 17188745 (0.52 Gb)                             | 467194 (0.02 Gb)                                  |
|               | ES-3           | 76779322 (2.45 Gb)                           | 56799108 (1.75 Gb)                             | 1370413 (0.05 Gb)                                 |
|               | ES-5           | 46597803 (1.46 Gb)                           | 22314735 (0.66 Gb)                             | 603597 (0.02Gb)                                   |
|               | <b>ES all</b>  | <b>155610663 (4.91 Gb)</b>                   | <b>96334528 (2.93 Gb)</b>                      | <b>2441204 (0.08 Gb)</b>                          |
| EB            | EB-1           | 95893107 (2.98 Gb)                           | 57876542 (1.76 Gb)                             | 2407871 (0.08 Gb)                                 |
|               | EB-2           | 12783982 (0.39 Gb)                           | 6807410 (0.20 Gb)                              | 205224 (0.01 Gb)                                  |
|               | EB-5           | 51007013 (1.60 Gb)                           | 26466027 (0.80 Gb)                             | 767657 (0.02 Gb)                                  |
|               | <b>EB all</b>  | <b>159684102 (4.98 Gb)</b>                   | <b>91202673 (2.77 Gb)</b>                      | <b>3380752 (0.11 Gb)</b>                          |

**Supplementary Table 2.** Anti-sense junction counts as a metric for directionality. Sense strand junctions identified by more than two tags were examined for anti-sense transcripts. The table describes the number of tags hitting sense-strand junctions, the number of tags hitting anti-sense strand junctions, and the proportion of tags mapping to anti-sense junctions.

|               | <b>Sense<br/>Junctions</b> | <b>Anti-sense<br/>Junctions</b> | <b>Proportion of<br/>Anti-sense Junctions</b> |
|---------------|----------------------------|---------------------------------|-----------------------------------------------|
| <b>ES-2</b>   | 431893                     | 390                             | 0.09%                                         |
| <b>ES-3</b>   | 1335801                    | 1824                            | 0.14%                                         |
| <b>ES-5</b>   | 565839                     | 726                             | 0.13%                                         |
| <b>ES all</b> | 2394032                    | 4806                            | 0.20%                                         |
| <b>EB-1</b>   | 2360877                    | 2859                            | 0.12%                                         |
| <b>EB-2</b>   | 181081                     | 537                             | 0.30%                                         |
| <b>EB-5</b>   | 731486                     | 4840                            | 0.66%                                         |
| <b>EB all</b> | 3329019                    | 13009                           | 0.39%                                         |

**Supplementary Tables 3.** URLs of wiggle plots and BED tracks to visualize SQRL data of ES and EB cell state transcriptomes.

| <b>Description</b>                       | <b>URL</b>                                                                                                                                                                                                                            |
|------------------------------------------|---------------------------------------------------------------------------------------------------------------------------------------------------------------------------------------------------------------------------------------|
| <b>Informative Junctions</b>             | <a href="http://grimmond.imb.uq.edu.au/files/nicole/mm9/general/mm9_60mer_informative_junctions.BED.bz2">http://grimmond.imb.uq.edu.au/files/nicole/mm9/general/mm9_60mer_informative_junctions.BED.bz2</a>                           |
| <b>Diagnostic exons</b>                  | <a href="http://grimmond.imb.uq.edu.au/files/nicole/mm9/general/aceview.mm9.ucsc.diagnostic.exons.gz">http://grimmond.imb.uq.edu.au/files/nicole/mm9/general/aceview.mm9.ucsc.diagnostic.exons.gz</a>                                 |
| <b>Diagnostic junctions</b>              | <a href="http://grimmond.imb.uq.edu.au/files/nicole/mm9/general/aceview.mm9.ucsc.only.diagnostic.junctions.bed.gz">http://grimmond.imb.uq.edu.au/files/nicole/mm9/general/aceview.mm9.ucsc.only.diagnostic.junctions.bed.gz</a>       |
| <b>EB junction BED track</b>             | <a href="http://grimmond.imb.uq.edu.au/files/nicole/mm9/ESEB/EB.all.sense.junctions.track.gz">http://grimmond.imb.uq.edu.au/files/nicole/mm9/ESEB/EB.all.sense.junctions.track.gz</a>                                                 |
| <b>ES junction BED track</b>             | <a href="http://grimmond.imb.uq.edu.au/files/nicole/mm9/ESEB/ES.all.sense.junctions.track.gz">http://grimmond.imb.uq.edu.au/files/nicole/mm9/ESEB/ES.all.sense.junctions.track.gz</a>                                                 |
| <b>EB Wiggle 4+ tags positive strand</b> | <a href="http://grimmond.imb.uq.edu.au/files/nicole/mm9/ESEB/EB.all.combined.positive.wig.rounded.condensed.4plus.gz">http://grimmond.imb.uq.edu.au/files/nicole/mm9/ESEB/EB.all.combined.positive.wig.rounded.condensed.4plus.gz</a> |
| <b>EB Wiggle 4+ tags negative strand</b> | <a href="http://grimmond.imb.uq.edu.au/files/nicole/mm9/ESEB/EB.all.combined.negative.wig.rounded.condensed.4plus.gz">http://grimmond.imb.uq.edu.au/files/nicole/mm9/ESEB/EB.all.combined.negative.wig.rounded.condensed.4plus.gz</a> |
| <b>ES Wiggle 4+ tags positive strand</b> | <a href="http://grimmond.imb.uq.edu.au/files/nicole/mm9/ESEB/ES.all.combined.positive.wig.rounded.condensed.4plus.gz">http://grimmond.imb.uq.edu.au/files/nicole/mm9/ESEB/ES.all.combined.positive.wig.rounded.condensed.4plus.gz</a> |
| <b>ES Wiggle 4+ tags negative strand</b> | <a href="http://grimmond.imb.uq.edu.au/files/nicole/mm9/ESEB/ES.all.combined.negative.wig.rounded.condensed.4plus.gz">http://grimmond.imb.uq.edu.au/files/nicole/mm9/ESEB/ES.all.combined.negative.wig.rounded.condensed.4plus.gz</a> |

**Supplementary Table 4.** Number and proportion Refseq loci identified by SQRL.

Statistics are shown as the number of tags which match to the sense strand of Refseq exons at multiple tag thresholds.

| <b>Tags</b>    | <b>ES combined<br/>number</b> | <b>EB combined<br/>number</b> | <b>ES combined<br/>proportion (%)</b> | <b>EB combined<br/>proportion(%)</b> |
|----------------|-------------------------------|-------------------------------|---------------------------------------|--------------------------------------|
| 1 to 9         | 2436                          | 2732                          | 13.21%                                | 14.93%                               |
| 10 to 99       | 4800                          | 4207                          | 26.02%                                | 22.99%                               |
| 100 to 999     | 5736                          | 4828                          | 31.09%                                | 26.38%                               |
| 1000 to 9999   | 5077                          | 5895                          | 27.52%                                | 32.21%                               |
| 10000 to 99999 | 391                           | 626                           | 2.12%                                 | 3.42%                                |
| 100000 +       | 7                             | 8                             | 0.04%                                 | 0.04%                                |



**Supplementary Table 5.** Statistically significant differentially expressed genes. Significance was determined by the empirical Bayes method. Lists are ranked by B statistic.

**Table 5a.** Genes up-regulated in the ESC library.

| Refseq UCSC_ID | Bstat | Fold change | Gene symbol   | Refseq ID    |
|----------------|-------|-------------|---------------|--------------|
| 577            | 10.26 | 21.43       | Tcfcp2l1      | NM_023755    |
| 5456           | 9.77  | 41.83       | Tdh           | NM_021480    |
| 10018          | 9.54  | 13.69       | Gm1967        | NM_001033452 |
| 15887          | 8.95  | 12.79       | EG435970      | NM_001034893 |
| 985            | 8.33  | 19.32       | Ifi202b       | NM_008327    |
| 10644          | 8.18  | 7.66        | Mybl2         | NM_008652    |
| 6807           | 8.07  | 22.29       | Dppa2         | NM_028615    |
| 21838          | 8.01  | 15.36       | Fgf4          | NM_010202    |
| 319            | 7.92  | 8.96        | Mreg          | NM_001005423 |
| 15897          | 7.83  | 7.27        | 4933405K07Rik | NM_028913    |
| 20848          | 7.82  | 20.54       | Krt42         | NM_212483    |
| 726            | 7.46  | 12.93       | Nr5a2         | NM_030676    |
| 5367           | 7.44  | 10.89       | Tgm1          | NM_019984    |
| 2133           | 7.42  | 14.45       | Cobl          | NM_172496    |
| 12114          | 7.38  | 23.83       | Klf4          | NM_010637    |
| 14257          | 7.34  | 7.26        | Cav1          | NM_007616    |
| 11017          | 7.26  | 8.65        | Phf17         | NM_172303    |
| 1041           | 7.23  | 7.13        | Lefty2        | NM_177099    |
| 1597           | 7.22  | 6.78        | 6330514A18Rik | NM_183152    |
| 13160          | 7.21  | 10.56       | Cnpy1         | NM_175651    |
| 12236          | 7.11  | 6.54        | Bnc2          | NM_172870    |
| 1043           | 7.09  | 23.63       | Lefty1        | NM_010094    |
| 15996          | 7.08  | 12.92       | Hsd17b14      | NM_025330    |
| 7789           | 7.00  | 12.23       | 1700061G19Rik | NM_030141    |
| 21186          | 6.86  | 8.41        | E130014J05Rik | NM_001040400 |
| 17531          | 6.85  | 10.96       | Clgn          | NM_009904    |
| 16769          | 6.80  | 29.50       | Mylpf         | NM_016754    |
| 7565           | 6.79  | 7.14        | Zfp57         | NM_001013745 |
| 4267           | 6.65  | 5.80        | Aoah          | NM_012054    |
| 15544          | 6.58  | 10.16       | Zfp296        | NM_022409    |
| 5039           | 6.58  | 10.55       | Myst4         | NM_017479    |
| 10521          | 6.53  | 6.91        | Hck           | NM_010407    |
| 8473           | 6.49  | 4.16        | Actn3         | NM_013456    |
| 11146          | 6.42  | 5.64        | Trim2         | NM_030706    |
| 5533           | 6.41  | 5.85        | Epb4.9        | NM_013514    |
| 1055           | 6.40  | 5.19        | Enah          | NM_008680    |
| 20715          | 6.34  | 4.99        | Fer1l3        | NM_001099634 |
| 5603           | 6.30  | 6.79        | Klf5          | NM_009769    |
| 20363          | 6.29  | 16.09       | Jam2          | NM_023844    |
| 8216           | 6.28  | 7.90        | Gm949         | NM_001033446 |
| 18538          | 6.28  | 5.09        | Rpp25         | NM_133982    |

|       |      |       |               |              |
|-------|------|-------|---------------|--------------|
| 20206 | 6.25 | 7.45  | Cental        | NM_172723    |
| 5646  | 6.20 | 4.74  | Slc15a1       | NM_053079    |
| 12233 | 6.13 | 5.48  | 1810054D07Rik | NM_027238    |
| 2120  | 6.08 | 5.98  | Tns3          | NM_001083587 |
| 11652 | 6.05 | 5.14  | F3            | NM_010171    |
| 2111  | 6.04 | 3.82  | Myo1g         | NM_178440    |
| 7787  | 5.99 | 5.28  | Rfx2          | NM_009056    |
| 8014  | 5.96 | 9.66  | Rnf125        | NM_026301    |
| 1897  | 5.95 | 5.24  | Gli1          | NM_010296    |
| 21050 | 5.81 | 3.53  | Atp11a        | NM_015804    |
| 18845 | 5.80 | 6.87  | Trf           | NM_133977    |
| 4500  | 5.80 | 4.01  | Edn1          | NM_010104    |
| 5534  | 5.75 | 7.29  | Fgf17         | NM_008004    |
| 4669  | 5.67 | 4.46  | EG630579      | NM_001039239 |
| 15405 | 5.66 | 4.04  | Gm397         | NM_001013765 |
| 15785 | 5.64 | 4.44  | Kirrel2       | NM_172898    |
| 10485 | 5.58 | 8.59  | Tcf15         | NM_009328    |
| 666   | 5.57 | 4.07  | Mdm4          | NM_008575    |
| 3122  | 5.53 | 5.09  | Mllt6         | NM_139311    |
| 5566  | 5.40 | 6.25  | Enox1         | NM_172813    |
| 15198 | 5.36 | 14.28 | Emp1          | NM_010128    |
| 19270 | 5.33 | 9.53  | Klhl13        | NM_026167    |
| 11897 | 5.30 | 6.08  | Ttpa          | NM_015767    |
| 2544  | 5.23 | 3.50  | Specc1        | NM_001029936 |
| 13979 | 5.23 | 5.81  | Zp3           | NM_011776    |
| 5876  | 5.22 | 4.10  | Wispl         | NM_018865    |
| 1853  | 5.18 | 6.51  | Irak3         | NM_028679    |
| 21793 | 5.12 | 3.72  | 2410081M15Rik | NM_028603    |
| 20707 | 5.11 | 6.73  | Dnahc8        | NM_013811    |
| 15618 | 5.11 | 3.56  | Atp1a3        | NM_144921    |
| 5388  | 5.08 | 3.98  | Gzme          | NM_010373    |
| 5782  | 5.08 | 3.39  | Ubr5          | NM_001081359 |
| 18823 | 5.07 | 4.36  | Mras          | NM_008624    |
| 1960  | 5.04 | 3.35  | Si            | NM_021882    |
| 770   | 5.04 | 4.47  | Niban         | NM_022018    |
| 14187 | 4.99 | 4.03  | Slc7a1        | NM_007513    |
| 9630  | 4.98 | 6.08  | Slc25a12      | NM_172436    |
| 8314  | 4.98 | 3.51  | Impa2         | NM_053261    |
| 20454 | 4.96 | 3.47  | Klk1          | NM_010639    |
| 11429 | 4.93 | 4.50  | Hist2h2bb     | NM_175666    |
| 4213  | 4.92 | 4.30  | Pfkip         | NM_019703    |
| 4673  | 4.90 | 4.42  | Fbp2          | NM_007994    |
| 6101  | 4.90 | 5.12  | 1700029P11Rik | NM_025503    |
| 14018 | 4.89 | 5.16  | Pcolce        | NM_008788    |
| 370   | 4.82 | 3.21  | Tuba4a        | NM_009447    |
| 3010  | 4.81 | 3.35  | Akap1         | NM_009648    |
| 780   | 4.79 | 3.66  | Nmnat2        | NM_175460    |
| 20873 | 4.76 | 29.31 | Calcoco2      | NM_001100177 |

|       |      |       |           |              |
|-------|------|-------|-----------|--------------|
| 19327 | 4.69 | 5.53  | Rhox10    | NM_001024850 |
| 21701 | 4.68 | 3.32  | Gast      | NM_010257    |
| 6323  | 4.68 | 4.19  | Galnt6    | NM_172451    |
| 5524  | 4.65 | 4.16  | Piwil2    | NM_021308    |
| 13595 | 4.64 | 2.95  | Aff1      | NM_133919    |
| 10964 | 4.61 | 3.10  | Skil      | NM_001039090 |
| 2529  | 4.61 | 6.45  | Aldh3a1   | NM_007436    |
| 7401  | 4.57 | 5.02  | Myo1f     | NM_053214    |
| 15455 | 4.55 | 3.64  | Obox6     | NM_145710    |
| 8758  | 4.53 | 3.06  | Tle4      | NM_011600    |
| 6674  | 4.52 | 3.62  | Bdh1      | NM_175177    |
| 19125 | 4.50 | 11.13 | Tcstv3    | NM_153523    |
| 10193 | 4.46 | 4.54  | Itpka     | NM_146125    |
| 3133  | 4.44 | 4.50  | Arl5c     | NM_207231    |
| 4443  | 4.44 | 3.80  | Serpinb1a | NM_025429    |
| 9154  | 4.43 | 3.56  | Sfmbt2    | NM_177386    |
| 4124  | 4.43 | 3.14  | Hsp90aa1  | NM_010480    |
| 4142  | 4.42 | 7.12  | Ckb       | NM_021273    |
| 14626 | 4.41 | 4.48  | Gm1070    | NM_001033462 |
| 3982  | 4.37 | 43.18 | Esrrb     | NM_011934    |
| 21210 | 4.33 | 48.65 | Zfp42     | NM_009556    |
| 7931  | 4.32 | 3.36  | Msh6      | NM_010830    |
| 11884 | 4.32 | 2.90  | Tmem64    | NM_181401    |
| 10642 | 4.32 | 3.47  | Sgk2      | NM_013731    |
| 4001  | 4.29 | 13.00 | EG435337  | NM_001013824 |
| 1925  | 4.28 | 2.97  | Baz2a     | NM_054078    |
| 12276 | 4.25 | 5.25  | Cdkn2b    | NM_007670    |
| 16764 | 4.24 | 3.09  | AI467606  | NM_178901    |
| 12820 | 4.22 | 2.95  | Arhgef10l | NM_172415    |
| 19546 | 4.17 | 14.05 | Nr0b1     | NM_007430    |
| 14235 | 4.16 | 4.29  | Asns      | NM_012055    |
| 6157  | 4.14 | 4.22  | Wnt7b     | NM_009528    |
| 1398  | 4.14 | 4.14  | Aifm2     | NM_178058    |
| 11913 | 4.13 | 4.74  | Fut9      | NM_010243    |
| 12613 | 4.12 | 7.18  | Dlgap3    | NM_198618    |
| 758   | 4.12 | 3.90  | Ptgs2     | NM_011198    |
| 3917  | 4.11 | 3.28  | Smoc1     | NM_022316    |
| 22235 | 4.10 | 8.49  | Bcl3      | NM_033601    |
| 1207  | 4.09 | 3.31  | Sgk       | NM_011361    |
| 13903 | 4.08 | 6.07  | Phkg1     | NM_011079    |
| 16622 | 4.07 | 3.41  | Arntl     | NM_007489    |
| 20654 | 4.06 | 3.16  | Lamc1     | NM_010683    |
| 19007 | 4.01 | 5.96  | Lrrc2     | NM_028838    |
| 8178  | 4.01 | 3.21  | Fgf1      | NM_010197    |
| 8446  | 4.00 | 3.43  | Cabp4     | NM_144532    |
| 9347  | 3.96 | 2.83  | Setx      | NM_198033    |
| 884   | 3.95 | 3.00  | Dusp27    | NM_001033344 |
| 4166  | 3.95 | 3.72  | Jag2      | NM_010588    |

|       |      |       |               |              |
|-------|------|-------|---------------|--------------|
| 16061 | 3.93 | 3.47  | E2f8          | NM_001013368 |
| 20266 | 3.91 | 6.49  | Pim1          | NM_008842    |
| 916   | 3.90 | 3.75  | Fcgr2b        | NM_001077189 |
| 4261  | 3.89 | 3.80  | Sfrp4         | NM_016687    |
| 10986 | 3.88 | 2.93  | Atp11b        | NM_029570    |
| 10490 | 3.84 | 4.41  | Trib3         | NM_175093    |
| 1784  | 3.83 | 16.26 | Nts           | NM_024435    |
| 12688 | 3.83 | 3.05  | Smpdl3b       | NM_133888    |
| 15004 | 3.82 | 4.85  | LOC634428     | NM_001080945 |
| 18662 | 3.78 | 4.22  | 6430514L14Rik | NM_029784    |
| 803   | 3.77 | 2.67  | Tor1aip2      | NM_172843    |
| 10079 | 3.74 | 3.27  | Bdnf          | NM_007540    |
| 8417  | 3.72 | 7.21  | Cpt1a         | NM_013495    |
| 6990  | 3.72 | 2.99  | Morc3         | NM_001045529 |
| 7528  | 3.72 | 2.91  | Dhx16         | NM_026987    |
| 3071  | 3.69 | 4.79  | Ngfr          | NM_033217    |
| 21953 | 3.69 | 6.14  | Manba         | NM_027288    |
| 9137  | 3.68 | 3.47  | Ccdc3         | NM_028804    |
| 15626 | 3.68 | 3.15  | Erf           | NM_010155    |
| 9636  | 3.67 | 3.42  | Itga6         | NM_008397    |
| 8090  | 3.64 | 2.54  | Slc23a1       | NM_011397    |
| 14020 | 3.63 | 5.13  | Sap25         | NM_001081962 |
| 15677 | 3.62 | 7.11  | Ltbp4         | NM_175641    |
| 1432  | 3.61 | 5.77  | Arid5b        | NM_023598    |
| 3015  | 3.59 | 2.67  | Trim25        | NM_009546    |
| 20401 | 3.58 | 2.85  | Cars          | NM_013742    |
| 13479 | 3.57 | 3.42  | Csn3          | NM_007786    |
| 10888 | 3.55 | 5.30  | Stmn2         | NM_025285    |
| 7712  | 3.54 | 6.68  | Tcfef         | NM_011549    |
| 12949 | 3.52 | 2.91  | Errfi1        | NM_133753    |
| 20833 | 3.52 | 4.86  | Ddx58         | NM_172689    |
| 3468  | 3.52 | 2.92  | Llgl2         | NM_145438    |
| 22476 | 3.51 | 2.94  | Pml           | NM_178087    |
| 22070 | 3.48 | 2.68  | C79267        | NM_183148    |
| 19609 | 3.47 | 3.43  | Slc7a3        | NM_007515    |
| 1219  | 3.47 | 3.98  | Vnn1          | NM_011704    |
| 12322 | 3.47 | 4.43  | Dnajc6        | NM_198412    |
| 11920 | 3.45 | 2.65  | Mdn1          | NM_001081392 |
| 6174  | 3.44 | 2.90  | Pim3          | NM_145478    |
| 13608 | 3.42 | 4.74  | C230055K05Rik | NM_001039231 |
| 17820 | 3.42 | 2.77  | Aars          | NM_146217    |
| 2548  | 3.41 | 2.78  | Ncor1         | NM_011308    |
| 16335 | 3.40 | 11.94 | Folr1         | NM_008034    |
| 8221  | 3.40 | 2.69  | Dmx11         | NM_001081371 |
| 18699 | 3.38 | 2.63  | Mapk6         | NM_027418    |
| 5814  | 3.38 | 3.04  | Trps1         | NM_032000    |
| 8065  | 3.35 | 3.02  | Epb4.114a     | NM_013512    |
| 17682 | 3.35 | 2.61  | Ndrp4         | NM_145602    |

|       |      |       |               |              |
|-------|------|-------|---------------|--------------|
| 13606 | 3.31 | 42.99 | Spp1          | NM_009263    |
| 20134 | 3.29 | 16.19 | Sep-01        | NM_017461    |
| 10353 | 3.27 | 2.52  | Slc4a11       | NM_001081162 |
| 3375  | 3.26 | 2.98  | Pecam1        | NM_008816    |
| 6968  | 3.26 | 2.54  | Tmem50b       | NM_030018    |
| 2726  | 3.26 | 5.89  | Tekt1         | NM_011569    |
| 17215 | 3.23 | 3.06  | Ash2l         | NM_011791    |
| 13252 | 3.22 | 3.61  | Zfyve28       | NM_001015039 |
| 3373  | 3.21 | 2.41  | Tex2          | NM_198292    |
| 17856 | 3.20 | 5.93  | Cdyl2         | NM_029441    |
| 11118 | 3.19 | 3.39  | Serpini1      | NM_009250    |
| 18794 | 3.18 | 3.80  | Pcolce2       | NM_029620    |
| 12966 | 3.18 | 2.92  | Plekhg5       | NM_001004156 |
| 3121  | 3.18 | 5.77  | E130012A19Rik | NM_175332    |
| 16724 | 3.17 | 2.59  | Nfatc2ip      | NM_010900    |
| 3245  | 3.16 | 2.87  | Hsd17b1       | NM_010475    |
| 12112 | 3.15 | 2.70  | Zfp462        | NM_172867    |
| 20892 | 3.11 | 11.26 | Zscan4d       | NM_001100186 |
| 3085  | 3.11 | 3.97  | Ttll6         | NM_172799    |
| 17776 | 3.10 | 3.50  | Sntb2         | NM_009229    |
| 5818  | 3.10 | 4.94  | Aard          | NM_175503    |
| 21169 | 3.10 | 2.32  | Brwd1         | NM_145125    |
| 17433 | 3.09 | 4.03  | Gdf15         | NM_011819    |
| 12766 | 3.09 | 4.52  | Tcea3         | NM_011542    |
| 15190 | 3.08 | 7.11  | Gprc5a        | NM_181444    |
| 22082 | 3.07 | 7.19  | Inpp5d        | NM_001110193 |
| 2555  | 3.06 | 3.69  | Trim16        | NM_053169    |
| 2137  | 3.05 | 3.29  | Egfr          | NM_207655    |
| 2201  | 3.04 | 2.36  | Spnb2         | NM_175836    |
| 13228 | 3.03 | 2.80  | Yes1          | NM_009535    |
| 3427  | 3.01 | 2.40  | Dnaic2        | NM_001034878 |
| 20871 | 2.99 | 3.73  | Atrx          | NM_009530    |
| 13960 | 2.99 | 3.06  | Mlxipl        | NM_021455    |
| 12845 | 2.97 | 7.21  | Fblim1        | NM_133754    |
| 20117 | 2.97 | 7.12  | Mkrm1         | NM_018810    |
| 17521 | 2.95 | 9.64  | Gab1          | NM_021356    |
| 20493 | 2.95 | 3.00  | Tmem92        | NM_001034896 |
| 12223 | 2.94 | 2.77  | Jmjd2c        | NM_144787    |
| 3636  | 2.94 | 3.97  | Ubx4          | NM_145441    |
| 16032 | 2.93 | 6.17  | Saa3          | NM_011315    |
| 15289 | 2.93 | 10.46 | AU018091      | NM_001004153 |
| 1595  | 2.91 | 3.47  | Reep6         | NM_139292    |
| 9602  | 2.88 | 2.52  | Lass6         | NM_172856    |
| 15904 | 2.88 | 4.50  | Klk10         | NM_133712    |
| 9547  | 2.87 | 3.99  | Rif1          | NM_175238    |
| 6368  | 2.86 | 4.50  | Itgb7         | NM_013566    |
| 12321 | 2.85 | 2.41  | Ak3l1         | NM_009647    |
| 10305 | 2.84 | 3.57  | Mal           | NM_010762    |

|       |      |       |          |              |
|-------|------|-------|----------|--------------|
| 124   | 2.83 | 2.68  | BC050210 | NM_201365    |
| 14275 | 2.83 | 3.24  | Aass     | NM_013930    |
| 2532  | 2.83 | 4.54  | Slc47a1  | NM_026183    |
| 8860  | 2.81 | 2.42  | Acta2    | NM_007392    |
| 15652 | 2.81 | 3.20  | Axl      | NM_009465    |
| 15214 | 2.81 | 2.51  | Eps8     | NM_007945    |
| 8082  | 2.79 | 2.28  | Egr1     | NM_007913    |
| 22296 | 2.76 | 2.58  | Xrcc5    | NM_009533    |
| 13524 | 2.75 | 2.62  | Vdp      | NM_019490    |
| 17806 | 2.73 | 3.55  | Calb2    | NM_007586    |
| 21059 | 2.70 | 2.55  | Cnnm2    | NM_033569    |
| 21938 | 2.69 | 2.47  | Atxn1    | NM_009124    |
| 13982 | 2.69 | 2.63  | Rasa4    | NM_133914    |
| 17621 | 2.68 | 3.95  | Chd9     | NM_177224    |
| 2793  | 2.68 | 3.32  | Serpinf1 | NM_011340    |
| 6100  | 2.67 | 2.93  | Pmm1     | NM_013872    |
| 6329  | 2.67 | 2.92  | Grasp    | NM_019518    |
| 2229  | 2.67 | 3.57  | Stk10    | NM_009288    |
| 13427 | 2.67 | 3.62  | Kit      | NM_021099    |
| 20177 | 2.66 | 2.67  | Ctcf1    | NM_001081387 |
| 7568  | 2.65 | 3.64  | Gabbr1   | NM_019439    |
| 6969  | 2.64 | 2.88  | Gart     | NM_010256    |
| 13443 | 2.64 | 2.74  | Rest     | NM_011263    |
| 13743 | 2.63 | 22.01 | Pla2g1b  | NM_011107    |
| 15254 | 2.63 | 5.85  | Beat1    | NM_007532    |
| 11663 | 2.62 | 2.31  | Usp53    | NM_133857    |
| 19416 | 2.62 | 2.24  | Zic3     | NM_009575    |
| 17830 | 2.62 | 2.62  | Ldhd     | NM_027570    |
| 6917  | 2.62 | 2.33  | Gabpa    | NM_008065    |
| 8801  | 2.62 | 2.35  | Pip5k1b  | NM_008846    |
| 13896 | 2.60 | 3.28  | Mmp17    | NM_011846    |
| 12784 | 2.60 | 2.31  | Usp48    | NM_130879    |
| 3272  | 2.59 | 2.26  | Vat1     | NM_012037    |
| 2802  | 2.57 | 2.39  | Myo1c    | NM_008659    |
| 20749 | 2.56 | 2.55  | Alms1    | NM_145223    |
| 14217 | 2.54 | 4.99  | Col1a2   | NM_007743    |
| 5152  | 2.54 | 3.95  | Mmrn2    | NM_153127    |
| 7711  | 2.53 | 3.80  | Pgc      | NM_025973    |
| 8921  | 2.53 | 2.32  | Zfp518   | NM_028319    |
| 12461 | 2.52 | 3.12  | Plk3     | NM_013807    |
| 2234  | 2.52 | 3.08  | Ranbp17  | NM_023146    |
| 12012 | 2.52 | 2.36  | Rusc2    | NM_001037709 |
| 2737  | 2.51 | 3.27  | Camkk1   | NM_018883    |
| 5733  | 2.49 | 2.66  | Myo10    | NM_019472    |
| 20522 | 2.49 | 2.54  | Lnpep    | NM_172827    |
| 5717  | 2.48 | 2.53  | Npr3     | NM_001039181 |
| 4461  | 2.48 | 3.92  | Tubb2b   | NM_023716    |
| 13784 | 2.48 | 2.36  | Oas2     | NM_145227    |

|       |      |      |               |              |
|-------|------|------|---------------|--------------|
| 15256 | 2.47 | 2.41 | Lrmp          | NM_008511    |
| 1467  | 2.46 | 3.48 | Susd2         | NM_027890    |
| 17598 | 2.46 | 2.65 | Gpt2          | NM_173866    |
| 19144 | 2.44 | 2.69 | B020031M17Rik | NM_001033769 |
| 843   | 2.43 | 2.23 | Bat2d         | NM_001081290 |
| 638   | 2.42 | 2.36 | Dyrk3         | NM_145508    |
| 18195 | 2.42 | 2.91 | Zbtb44        | NM_172765    |
| 11711 | 2.39 | 2.89 | Npnt          | NM_033525    |
| 18805 | 2.39 | 3.72 | Zbtb38        | NM_175537    |
| 10958 | 2.38 | 5.33 | Lrrc34        | NM_027941    |
| 4837  | 2.38 | 2.58 | Hexb          | NM_010422    |
| 6673  | 2.37 | 5.15 | Apod          | NM_007470    |
| 22009 | 2.34 | 2.87 | Wdtd1         | NM_199306    |
| 5466  | 2.33 | 2.31 | Kif13b        | NM_001081177 |
| 3685  | 2.33 | 3.09 | Grhl1         | NM_145890    |
| 15784 | 2.33 | 4.28 | Aplp1         | NM_007467    |
| 5165  | 2.32 | 2.54 | Gcap14        | NM_027045    |
| 11076 | 2.31 | 2.14 | Mbnl1         | NM_020007    |
| 12305 | 2.30 | 8.49 | L1td1         | NM_001081202 |
| 18360 | 2.29 | 3.13 | Pou2f3        | NM_011139    |
| 10554 | 2.25 | 2.19 | Cbfa2t2       | NM_172860    |
| 19608 | 2.25 | 3.91 | Tex11         | NM_031384    |
| 18603 | 2.24 | 2.93 | Lctl          | NM_145835    |
| 7095  | 2.22 | 2.08 | Mllt4         | NM_010806    |
| 7742  | 2.18 | 4.96 | Pcaf          | NM_020005    |
| 13879 | 2.17 | 2.21 | Ccdc92        | NM_144819    |
| 5340  | 2.14 | 2.40 | Zfhx2         | NM_001039198 |
| 7089  | 2.14 | 2.17 | Sod2          | NM_013671    |
| 22367 | 2.14 | 2.81 | Tjp2          | NM_011597    |
| 15599 | 2.13 | 3.05 | Cadm4         | NM_153112    |
| 10350 | 2.13 | 2.51 | Prosapip1     | NM_197945    |
| 21093 | 2.13 | 2.96 | Dclk2         | NM_027539    |
| 5149  | 2.12 | 2.57 | Glud1         | NM_008133    |
| 2246  | 2.11 | 2.31 | Wwc1          | NM_170779    |
| 11862 | 2.10 | 2.32 | Plekhf2       | NM_175175    |
| 12106 | 2.09 | 2.99 | AI427809      | NM_001033454 |
| 19025 | 2.08 | 2.39 | Glb1          | NM_009752    |
| 341   | 2.08 | 4.77 | Slc11a1       | NM_013612    |
| 22378 | 2.06 | 3.29 | Snta1         | NM_009228    |
| 15423 | 2.06 | 2.15 | Zfp110        | NM_022981    |
| 16191 | 2.05 | 5.21 | Slc28a1       | NM_001004184 |
| 4511  | 2.05 | 2.80 | Jarid2        | NM_021878    |
| 17582 | 2.04 | 2.54 | Hook2         | NM_133255    |
| 10963 | 2.03 | 2.11 | Prkci         | NM_008857    |
| 19969 | 2.03 | 2.59 | Mep1b         | NM_008586    |
| 22464 | 2.02 | 2.36 | Mpzl2         | NM_007962    |
| 14998 | 2.02 | 2.66 | Mfap5         | NM_015776    |
| 15081 | 2.01 | 2.12 | 9630033F20Rik | NM_177003    |

|       |      |      |                    |              |
|-------|------|------|--------------------|--------------|
| 15997 | 2.00 | 2.32 | Bcat2              | NM_009737    |
| 10173 | 2.00 | 2.30 | Case5              | NM_029617    |
| 14599 | 1.98 | 2.43 | Smarcad1           | NM_007958    |
| 17520 | 1.97 | 2.31 | Smarca5            | NM_053124    |
| 15386 | 1.95 | 3.31 | Aurkc              | NM_001080965 |
| 21955 | 1.95 | 2.93 | Ppef2              | NM_011148    |
| 10073 | 1.95 | 2.22 | 2700007P21Rik      | NM_173750    |
| 8429  | 1.95 | 3.38 | Aldh3b1            | NM_026316    |
| 11396 | 1.94 | 2.78 | Mcl1               | NM_008562    |
| 18958 | 1.94 | 2.07 | Col7a1             | NM_007738    |
| 13636 | 1.94 | 3.24 | Mtf2               | NM_013827    |
| 18346 | 1.93 | 2.57 | Gramd1b            | NM_172768    |
| 20710 | 1.93 | 2.69 | Rnf39              | NM_001099632 |
| 17954 | 1.91 | 2.35 | Taf5l              | NM_133966    |
| 7643  | 1.91 | 3.56 | Enpp4              | NM_199016    |
| 13111 | 1.90 | 2.23 | AB112350           | NM_178728    |
| 15251 | 1.90 | 2.68 | St8sia1            | NM_011374    |
| 9538  | 1.90 | 2.05 | Kif5c              | NM_008449    |
| 17220 | 1.90 | 2.22 | Fnta               | NM_008033    |
| 2586  | 1.88 | 4.33 | Ntn1               | NM_008744    |
| 3224  | 1.88 | 2.39 | Klhl11             | NM_172565    |
| 14973 | 1.85 | 2.74 | EG406236           | NM_001037155 |
| 2378  | 1.85 | 2.06 | Hspa4              | NM_008300    |
| 19769 | 1.85 | 2.33 | Prps1              | NM_021463    |
| 16317 | 1.84 | 2.44 | Plekhb1            | NM_013746    |
| 12119 | 1.84 | 2.37 | Cttnal1            | NM_018761    |
| 16857 | 1.83 | 2.63 | Ctbp2              | NM_009980    |
| 12885 | 1.83 | 2.67 | OTTMUSG00000010173 | NM_001037926 |
| 6617  | 1.80 | 2.71 | Liph               | NM_001083894 |
| 17772 | 1.80 | 2.24 | Tmco7              | NM_173037    |
| 18487 | 1.79 | 2.52 | Cul5               | NM_027807    |
| 1658  | 1.79 | 3.67 | Aes                | NM_010347    |
| 7883  | 1.78 | 2.42 | Cdc42ep3           | NM_026514    |
| 9567  | 1.78 | 2.24 | Tanc1              | NM_198294    |
| 10959 | 1.76 | 4.38 | 4930558O21Rik      | NM_026668    |
| 21198 | 1.75 | 2.33 | Acacb              | NM_133904    |
| 15857 | 1.74 | 7.83 | 2410004F06Rik      | NM_001082581 |
| 3472  | 1.74 | 2.50 | Itgb4              | NM_001005608 |
| 15797 | 1.74 | 9.44 | Zbtb32             | NM_021397    |
| 2077  | 1.72 | 2.91 | Nefh               | NM_010904    |
| 5326  | 1.71 | 2.40 | Acin1              | NM_023190    |
| 5573  | 1.70 | 2.14 | Tnfsf11            | NM_011613    |
| 12554 | 1.70 | 2.47 | Bmp8b              | NM_007559    |
| 12105 | 1.70 | 4.30 | Abca1              | NM_013454    |
| 15457 | 1.70 | 5.75 | Crxos1             | NM_001033638 |
| 10491 | 1.70 | 2.66 | Nrsn2              | NM_001009948 |
| 12657 | 1.69 | 2.46 | Tinagl             | NM_023476    |
| 19488 | 1.69 | 2.15 | Pdzd4              | NM_001029868 |



|       |      |       |               |              |
|-------|------|-------|---------------|--------------|
| 15975 | 1.68 | 2.73  | Cd37          | NM_007645    |
| 4371  | 1.67 | 2.21  | Hist1h3c      | NM_175653    |
| 2145  | 1.64 | 2.07  | Etaal         | NM_026576    |
| 12838 | 1.63 | 7.41  | Epha2         | NM_010139    |
| 17316 | 1.62 | 2.33  | Acs1l         | NM_007981    |
| 7171  | 1.62 | 3.11  | Srrm2         | NM_175229    |
| 2749  | 1.61 | 2.73  | Aspa          | NM_023113    |
| 569   | 1.61 | 2.19  | Serpinb8      | NM_011459    |
| 2864  | 1.60 | 2.26  | A830091I15Rik | NM_172795    |
| 3062  | 1.59 | 5.24  | Itga3         | NM_013565    |
| 13446 | 1.57 | 4.42  | Igfbp7        | NM_008048    |
| 147   | 1.57 | 2.48  | Chst10        | NM_145142    |
| 7689  | 1.57 | 3.27  | Gnmt          | NM_010321    |
| 10154 | 1.56 | 2.67  | Rasgrp1       | NM_011246    |
| 14000 | 1.56 | 2.98  | Vgf           | NM_001039385 |
| 2888  | 1.56 | 2.34  | Suz12         | NM_199196    |
| 2689  | 1.56 | 2.29  | Mink1         | NM_001045964 |
| 14198 | 1.55 | 2.61  | Brca2         | NM_009765    |
| 2062  | 1.55 | 2.00  | Tbc1d10a      | NM_134023    |
| 113   | 1.55 | 2.59  | Hs6st1        | NM_015818    |
| 4094  | 1.54 | 14.57 | Tcl1          | NM_009337    |
| 21541 | 1.53 | 2.13  | Fat1          | NM_001081286 |
| 6845  | 1.52 | 2.27  | Col8a1        | NM_007739    |
| 17244 | 1.51 | 2.27  | Rbm13         | NM_026453    |
| 12975 | 1.50 | 2.55  | Acot7         | NM_133348    |
| 18920 | 1.50 | 2.47  | Camkv         | NM_145621    |
| 6370  | 1.49 | 3.47  | Rarg          | NM_011244    |
| 8366  | 1.48 | 2.37  | Pias2         | NM_008602    |
| 5150  | 1.48 | 24.46 | 2200001I15Rik | NM_183278    |
| 21995 | 1.48 | 12.80 | Tex14         | NM_031386    |
| 17294 | 1.47 | 21.66 | Triml1        | NM_177742    |
| 13537 | 1.47 | 2.06  | Shroom3       | NM_015756    |
| 16766 | 1.46 | 4.44  | Spn           | NM_001037810 |
| 21517 | 1.46 | 2.45  | Capn3         | NM_007601    |
| 15691 | 1.45 | 2.50  | C030039L03Rik | NM_198417    |
| 2211  | 1.44 | 2.15  | Cpeb4         | NM_026252    |
| 12616 | 1.44 | 4.10  | Gjb3          | NM_008126    |
| 3009  | 1.44 | 2.03  | Msi2          | NM_054043    |
| 14808 | 1.43 | 2.30  | V1rb3         | NM_053226    |
| 16604 | 1.42 | 2.02  | Ipo7          | NM_181517    |
| 2275  | 1.42 | 2.37  | Cyfip2        | NM_133769    |
| 13255 | 1.42 | 2.84  | Tnip2         | NM_139064    |
| 4447  | 1.41 | 3.70  | Serpinb9b     | NM_011452    |
| 7322  | 1.41 | 2.06  | Fkbp5         | NM_010220    |
| 6509  | 1.40 | 2.12  | Dnm1l         | NM_152816    |
| 2894  | 1.39 | 1.98  | Rhot1         | NM_021536    |
| 18822 | 1.38 | 2.43  | D9Erttd280e   | NM_177775    |
| 455   | 1.37 | 3.37  | Efhd1         | NM_028889    |

|       |      |       |                    |              |
|-------|------|-------|--------------------|--------------|
| 14972 | 1.37 | 2.40  | Wnk1               | NM_198703    |
| 1299  | 1.36 | 2.30  | A530089I17Rik      | NM_133999    |
| 4838  | 1.36 | 2.14  | Enc1               | NM_007930    |
| 11963 | 1.35 | 8.54  | Aqp3               | NM_016689    |
| 21717 | 1.34 | 2.48  | Gmpr               | NM_025508    |
| 12070 | 1.33 | 2.45  | Anp32b             | NM_130889    |
| 5118  | 1.33 | 2.10  | Ankrd28            | NM_001024604 |
| 13664 | 1.33 | 3.11  | Gm1679             | NM_001033459 |
| 16258 | 1.32 | 2.48  | Rab30              | NM_029494    |
| 12201 | 1.32 | 2.19  | Tnc                | NM_011607    |
| 16736 | 1.32 | 12.50 | Nupr1              | NM_019738    |
| 22457 | 1.30 | 2.07  | Ankrd25            | NM_145611    |
| 4580  | 1.30 | 3.35  | Cltb               | NM_028870    |
| 13711 | 1.30 | 2.44  | Foxn4              | NM_148935    |
| 16539 | 1.29 | 16.72 | Rbmx12             | NM_029660    |
| 20307 | 1.27 | 2.48  | C77370             | NM_001077354 |
| 2836  | 1.26 | 2.40  | Nufip2             | NM_001024205 |
| 11556 | 1.26 | 1.96  | Rbm15              | NM_001045807 |
| 18146 | 1.26 | 2.76  | Rab3d              | NM_031874    |
| 19858 | 1.24 | 2.68  | Mtap7d2            | NM_001081124 |
| 21488 | 1.22 | 2.51  | C230081A13Rik      | NM_172924    |
| 3115  | 1.21 | 2.17  | Npepps             | NM_008942    |
| 1271  | 1.21 | 2.09  | Dse                | NM_172508    |
| 5921  | 1.19 | 5.44  | Mafa               | NM_194350    |
| 21192 | 1.17 | 7.91  | OTTMUSG00000011070 | NM_001103158 |
| 2633  | 1.17 | 2.39  | Senp3              | NM_030702    |
| 17853 | 1.17 | 2.26  | Maf                | NM_001025577 |
| 3100  | 1.16 | 2.16  | Nfe2l1             | NM_008686    |
| 9169  | 1.15 | 3.35  | St8sia6            | NM_145838    |
| 12306 | 1.14 | 3.36  | Ankrd38            | NM_172872    |
| 19654 | 1.13 | 2.04  | Taf9b              | NM_001001176 |
| 8794  | 1.12 | 3.09  | Klf9               | NM_010638    |
| 8013  | 1.10 | 2.23  | D030074E01Rik      | NM_029491    |
| 175   | 1.10 | 2.76  | 1500015O10Rik      | NM_024283    |
| 2131  | 1.09 | 3.27  | Ddc                | NM_016672    |
| 3816  | 1.09 | 2.20  | Fancm              | NM_178912    |
| 202   | 1.09 | 2.09  | 1700019D03Rik      | NM_144953    |
| 1406  | 1.09 | 2.11  | Hk1                | NM_010438    |
| 2973  | 1.08 | 2.07  | Thrap1             | NM_001080931 |
| 17542 | 1.07 | 5.35  | Cd97               | NM_011925    |
| 12107 | 1.06 | 2.53  | Slc44a1            | NM_133891    |
| 20387 | 1.06 | 2.21  | Nfib               | NM_008687    |
| 13345 | 1.06 | 2.71  | Rbpj               | NM_001080928 |
| 14022 | 1.05 | 2.13  | Hrbl               | NM_178162    |
| 4671  | 1.05 | 3.51  | 6720457D02Rik      | NM_175252    |
| 20693 | 1.04 | 2.81  | Gzmd               | NM_010372    |
| 20619 | 1.04 | 2.18  | Wasf3              | NM_145155    |
| 9415  | 1.03 | 2.14  | Dnm1               | NM_010065    |

|       |      |       |                    |              |
|-------|------|-------|--------------------|--------------|
| 8100  | 1.03 | 3.07  | Pura               | NM_008989    |
| 1389  | 1.02 | 4.12  | Adamts14           | NM_001081127 |
| 21968 | 1.02 | 11.00 | Dmrt1              | NM_015826    |
| 1167  | 1.01 | 3.71  | Utrn               | NM_011682    |
| 20877 | 1.01 | 3.32  | Usp7               | NM_001003918 |
| 19617 | 1.00 | 2.49  | Zmym3              | NM_019831    |
| 18872 | 0.98 | 2.17  | Twf2               | NM_011876    |
| 882   | 0.98 | 2.13  | Pou2f1             | NM_011137    |
| 90    | 0.96 | 1.90  | Phf3               | NM_001081080 |
| 17955 | 0.95 | 3.35  | AK122209           | NM_001029876 |
| 10285 | 0.95 | 2.64  | Usp50              | NM_029163    |
| 12143 | 0.94 | 2.00  | Rod1               | NM_144904    |
| 7654  | 0.94 | 2.92  | Slc29a1            | NM_022880    |
| 2907  | 0.93 | 4.11  | Ccl7               | NM_013654    |
| 7446  | 0.92 | 3.59  | Btnl7              | NM_001081663 |
| 12048 | 0.90 | 1.97  | Zcchc7             | NM_177027    |
| 2551  | 0.90 | 2.13  | Trpv2              | NM_011706    |
| 14721 | 0.90 | 2.80  | Rab11fip5          | NM_001003955 |
| 1973  | 0.89 | 2.34  | Iga7               | NM_008398    |
| 579   | 0.89 | 2.63  | Inhbb              | NM_008381    |
| 18113 | 0.89 | 4.26  | Icam1              | NM_010493    |
| 6018  | 0.89 | 2.93  | Mfng               | NM_008595    |
| 7676  | 0.88 | 2.87  | Slc22a7            | NM_144856    |
| 102   | 0.88 | 2.45  | Dst                | NM_134448    |
| 12907 | 0.88 | 2.42  | Fbxo2              | NM_176848    |
| 1169  | 0.88 | 4.57  | Plagl1             | NM_009538    |
| 5172  | 0.87 | 3.39  | Sh2d4b             | NM_177816    |
| 10200 | 0.86 | 2.24  | Mga                | NM_013720    |
| 13159 | 0.86 | 2.96  | En2                | NM_010134    |
| 9589  | 0.86 | 1.93  | Scn3a              | NM_018732    |
| 20194 | 0.86 | 2.11  | Trim52             | NM_198601    |
| 19070 | 0.86 | 2.76  | Mobp               | NM_001039365 |
| 21682 | 0.85 | 2.56  | Col18a1            | NM_009929    |
| 19635 | 0.85 | 2.44  | 4930519F16Rik      | NM_029170    |
| 9327  | 0.84 | 3.04  | Col5a1             | NM_015734    |
| 11392 | 0.84 | 6.73  | Hormad1            | NM_026489    |
| 13900 | 0.82 | 2.10  | Psph               | NM_133900    |
| 8326  | 0.81 | 2.43  | D18Ert653e         | NM_172631    |
| 20377 | 0.81 | 2.91  | Lox                | NM_010728    |
| 18820 | 0.80 | 2.51  | Pik3cb             | NM_029094    |
| 8187  | 0.80 | 2.01  | Lars               | NM_134137    |
| 2157  | 0.80 | 2.08  | Vps54              | NM_139061    |
| 3774  | 0.80 | 2.27  | Arhgap5            | NM_009706    |
| 20300 | 0.79 | 2.03  | Tbc1d10b           | NM_144522    |
| 17468 | 0.79 | 2.86  | Jak3               | NM_010589    |
| 7512  | 0.78 | 4.13  | Pou5f1             | NM_013633    |
| 19926 | 0.77 | 2.24  | Ddx3y              | NM_012008    |
| 10804 | 0.76 | 3.27  | OTTMUSG00000016571 | NM_001024825 |

|       |      |       |                    |              |
|-------|------|-------|--------------------|--------------|
| 12454 | 0.74 | 3.12  | Hpd1               | NM_146256    |
| 10619 | 0.73 | 2.63  | Tgm2               | NM_009373    |
| 9051  | 0.72 | 2.07  | Dusp5              | NM_001085390 |
| 20576 | 0.72 | 2.64  | Syt9               | NM_021889    |
| 10084 | 0.71 | 2.01  | Lgr4               | NM_172671    |
| 16773 | 0.71 | 1.92  | Sephs2             | NM_009266    |
| 15287 | 0.71 | 2.22  | 2810474O19Rik      | NM_026054    |
| 6019  | 0.71 | 2.13  | Card10             | NM_130859    |
| 3464  | 0.71 | 2.00  | Grb2               | NM_008163    |
| 21944 | 0.70 | 3.35  | Lima1              | NM_023063    |
| 18741 | 0.69 | 2.55  | 4930486G11Rik      | NM_175213    |
| 10463 | 0.69 | 2.11  | OTTMUSG00000015743 | NM_001034900 |
| 10831 | 0.67 | 1.93  | Tcf15              | NM_178254    |
| 11021 | 0.66 | 2.77  | Ccrn4l             | NM_009834    |
| 14907 | 0.66 | 2.24  | Irak2              | NM_172161    |
| 17288 | 0.66 | 2.38  | Mtus1              | NM_001005863 |
| 7834  | 0.65 | 3.62  | Lama1              | NM_008480    |
| 12891 | 0.63 | 5.81  | 2610305D13Rik      | NM_145078    |
| 3968  | 0.62 | 2.37  | Mlh3               | NM_175337    |
| 2074  | 0.62 | 2.09  | Nf2                | NM_010898    |
| 1042  | 0.61 | 2.07  | Pycr2              | NM_133705    |
| 12890 | 0.61 | 6.14  | OTTMUSG00000010673 | NM_001014397 |
| 19982 | 0.60 | 2.36  | Lama5              | NM_001081171 |
| 21595 | 0.60 | 2.63  | D430041B17Rik      | NM_172737    |
| 10777 | 0.60 | 7.15  | Tcfap2c            | NM_009335    |
| 2543  | 0.60 | 1.92  | Akap10             | NM_019921    |
| 20297 | 0.59 | 2.85  | Pde8a              | NM_008803    |
| 2838  | 0.59 | 1.84  | Myo18a             | NM_011586    |
| 16011 | 0.58 | 2.40  | Sult2b1            | NM_017465    |
| 10185 | 0.58 | 2.90  | Chac1              | NM_026929    |
| 22047 | 0.58 | 1.84  | Cul4b              | NM_028288    |
| 6237  | 0.58 | 1.96  | Rapgef3            | NM_144850    |
| 7149  | 0.58 | 2.51  | 2610036F08Rik      | NM_029281    |
| 18144 | 0.57 | 3.99  | Dock6              | NM_177030    |
| 2047  | 0.57 | 2.19  | Morc2a             | NM_198162    |
| 19638 | 0.57 | 4.03  | Tsx                | NM_009440    |
| 12010 | 0.56 | 1.85  | Unc13b             | NM_001081413 |
| 22364 | 0.56 | 2.19  | Capn1              | NM_001110504 |
| 21676 | 0.56 | 1.89  | Ahctf1             | NM_026375    |
| 2965  | 0.54 | 1.78  | Usp32              | NM_001029934 |
| 4996  | 0.54 | 1.78  | Slc4a7             | NM_001033270 |
| 6808  | 0.53 | 20.31 | Morc1              | NM_010816    |
| 3239  | 0.53 | 2.18  | Stat3              | NM_011486    |
| 16709 | 0.52 | 2.52  | Slc5a11            | NM_146198    |
| 277   | 0.52 | 2.92  | A430093A21Rik      | NM_001081436 |
| 9570  | 0.52 | 1.96  | Mar-07             | NM_020575    |
| 3817  | 0.52 | 2.06  | C79407             | NM_172578    |
| 17357 | 0.52 | 5.10  | Palld              | NM_001081390 |

|       |      |       |               |              |
|-------|------|-------|---------------|--------------|
| 19126 | 0.51 | 2.71  | LOC625360     | NM_001037925 |
| 12642 | 0.51 | 3.64  | Lck           | NM_010693    |
| 1391  | 0.51 | 1.86  | X99384        | NM_013753    |
| 438   | 0.50 | 2.85  | B3gnt7        | NM_145222    |
| 6606  | 0.50 | 2.16  | Clcn2         | NM_009900    |
| 5574  | 0.50 | 2.34  | Dgkh          | NM_001081336 |
| 8886  | 0.47 | 2.81  | Cep55         | NM_028760    |
| 5318  | 0.46 | 1.89  | Jub           | NM_010590    |
| 2750  | 0.46 | 3.10  | Spata22       | NM_001045531 |
| 1269  | 0.46 | 2.25  | BB146404      | NM_178908    |
| 19616 | 0.46 | 3.22  | Gjbl          | NM_008124    |
| 4492  | 0.45 | 1.93  | Paklip1       | NM_026550    |
| 20813 | 0.45 | 2.11  | Rad50         | NM_009012    |
| 10068 | 0.45 | 2.65  | Pax6          | NM_013627    |
| 12844 | 0.44 | 2.49  | Spn           | NM_019763    |
| 2075  | 0.44 | 1.83  | Nipsnap1      | NM_008698    |
| 13042 | 0.43 | 1.88  | Agri          | NM_021604    |
| 11883 | 0.43 | 2.81  | Efcbl1        | NM_178617    |
| 14637 | 0.42 | 2.00  | Ptcd3         | NM_027275    |
| 21846 | 0.42 | 2.19  | Cdh3          | NM_001037809 |
| 16259 | 0.42 | 2.16  | 4632434I11Rik | NM_001080995 |
| 16100 | 0.42 | 2.00  | BB128963      | NM_172742    |
| 5162  | 0.41 | 2.58  | Wapal         | NM_001004436 |
| 15752 | 0.41 | 2.53  | Ppp1r14a      | NM_026731    |
| 18733 | 0.40 | 1.94  | Col12a1       | NM_007730    |
| 19642 | 0.39 | 1.79  | Rnf12         | NM_011276    |
| 6124  | 0.39 | 2.10  | Tcf20         | NM_013836    |
| 7359  | 0.38 | 3.03  | Ubash3a       | NM_177823    |
| 13717 | 0.38 | 2.15  | Trpv4         | NM_022017    |
| 15001 | 0.37 | 11.02 | Gdf3          | NM_008108    |
| 18519 | 0.37 | 3.31  | Pstpip1       | NM_011193    |
| 762   | 0.37 | 2.14  | Tpr           | NM_133780    |
| 12913 | 0.36 | 1.93  | Srm           | NM_009272    |
| 4361  | 0.35 | 2.39  | Hist1h3d      | NM_178204    |
| 6322  | 0.35 | 2.68  | Ela1          | NM_033612    |
| 12711 | 0.35 | 3.92  | Zdhhc18       | NM_001017968 |
| 17345 | 0.34 | 2.49  | Sap30         | NM_021788    |
| 13618 | 0.34 | 1.90  | Lrrc8d        | NM_178701    |
| 1722  | 0.34 | 1.83  | 8030451F13Rik | NM_175418    |
| 18167 | 0.34 | 2.16  | 9530077C05Rik | NM_026739    |
| 14632 | 0.34 | 2.45  | Jmjd1a        | NM_173001    |
| 5420  | 0.33 | 33.69 | D14Ert668e    | NM_199015    |
| 20673 | 0.33 | 1.99  | Atad2b        | NM_001099628 |
| 5014  | 0.33 | 2.33  | Kenk5         | NM_021542    |
| 18188 | 0.32 | 2.11  | Igsf9b        | NM_001033323 |
| 5477  | 0.32 | 2.26  | Esco2         | NM_028039    |
| 22209 | 0.31 | 1.79  | Klhl22        | NM_145479    |
| 290   | 0.31 | 2.99  | Fzd5          | NM_001042659 |

|       |      |      |               |              |
|-------|------|------|---------------|--------------|
| 1896  | 0.30 | 2.67 | Arhgap9       | NM_146011    |
| 1558  | 0.30 | 2.94 | Fstl3         | NM_031380    |
| 4885  | 0.30 | 1.80 | Sgtb          | NM_144838    |
| 9839  | 0.30 | 2.70 | Pramel6       | NM_178249    |
| 10730 | 0.29 | 3.96 | Ncoa3         | NM_008679    |
| 6971  | 0.29 | 1.89 | Son           | NM_178880    |
| 14597 | 0.29 | 2.01 | Grid2         | NM_008167    |
| 6009  | 0.29 | 3.17 | Tst           | NM_009437    |
| 15730 | 0.28 | 6.39 | 5830482F20Rik | NM_177158    |
| 4236  | 0.28 | 3.99 | Nid1          | NM_010917    |
| 13324 | 0.27 | 1.84 | Lap3          | NM_024434    |
| 17714 | 0.27 | 1.89 | D230025D16Rik | NM_145604    |
| 17203 | 0.24 | 2.43 | Tacc1         | NM_177089    |
| 13964 | 0.24 | 4.07 | Fkbp6         | NM_033571    |
| 956   | 0.23 | 2.12 | Casq1         | NM_009813    |
| 4695  | 0.22 | 3.20 | Nlrp4f        | NM_175290    |
| 17938 | 0.22 | 2.51 | Spire2        | NM_172287    |
| 15635 | 0.21 | 2.24 | Ceacam1       | NM_001039185 |
| 808   | 0.21 | 1.84 | Abl2          | NM_009595    |
| 19859 | 0.19 | 3.60 | A830080D01Rik | NM_001033472 |
| 1961  | 0.19 | 2.18 | Dgka          | NM_016811    |
| 12631 | 0.19 | 1.94 | Yars          | NM_134151    |
| 5284  | 0.18 | 2.34 | Zfp219        | NM_027248    |
| 8892  | 0.18 | 1.92 | Tmem20        | NM_175507    |
| 12739 | 0.16 | 2.60 | Rhd           | NM_011270    |
| 655   | 0.16 | 2.06 | Pctk3         | NM_008795    |
| 17943 | 0.16 | 9.58 | Tubb3         | NM_023279    |
| 1611  | 0.16 | 1.93 | 9030607L17Rik | NM_027829    |
| 12941 | 0.15 | 2.81 | Spsb1         | NM_029035    |
| 1412  | 0.15 | 1.86 | Ddx21         | NM_019553    |
| 12815 | 0.14 | 1.89 | Aldh4a1       | NM_175438    |
| 17116 | 0.13 | 1.95 | Arhgef10      | NM_172751    |
| 13135 | 0.13 | 1.87 | Gbx1          | NM_015739    |
| 781   | 0.12 | 3.36 | Lamc2         | NM_008485    |
| 17471 | 0.12 | 3.32 | Fchol         | NM_028715    |
| 5692  | 0.11 | 1.94 | Nipbl         | NM_027707    |
| 18163 | 0.11 | 2.08 | Zfp809        | NM_172763    |
| 227   | 0.10 | 1.84 | Sgol2         | NM_199007    |
| 14680 | 0.10 | 1.94 | Sema4f        | NM_011350    |
| 11620 | 0.10 | 1.83 | Col11a1       | NM_007729    |
| 21993 | 0.10 | 1.83 | Sparc         | NM_009242    |
| 12086 | 0.10 | 1.77 | Tex10         | NM_172304    |
| 7159  | 0.10 | 2.52 | BC038613      | NM_153784    |
| 11741 | 0.09 | 1.82 | Adh4          | NM_011996    |
| 6376  | 0.09 | 1.99 | Sp1           | NM_013672    |
| 16235 | 0.08 | 2.37 | Nox4          | NM_015760    |
| 6282  | 0.07 | 2.04 | Kcnh3         | NM_010601    |
| 14188 | 0.07 | 1.78 | Ubl3          | NM_011908    |

|       |      |      |               |              |
|-------|------|------|---------------|--------------|
| 18808 | 0.06 | 1.92 | Slc25a36      | NM_138756    |
| 8269  | 0.06 | 4.04 | Cdx1          | NM_009880    |
| 5523  | 0.06 | 2.46 | Slc39a14      | NM_144808    |
| 2724  | 0.06 | 1.92 | Slc13a5       | NM_001004148 |
| 5775  | 0.06 | 1.69 | 4631426E05Rik | NM_025712    |
| 9619  | 0.05 | 1.76 | Zfp650        | NM_001081548 |
| 1554  | 0.04 | 2.43 | Hcn2          | NM_008226    |
| 3137  | 0.04 | 2.15 | Stac2         | NM_146028    |
| 21118 | 0.03 | 2.29 | Pou4f1        | NM_011143    |
| 1839  | 0.03 | 2.42 | Mdm2          | NM_010786    |
| 11780 | 0.02 | 1.93 | Ddah1         | NM_026993    |
| 6892  | 0.02 | 2.30 | Zfp654        | NM_028059    |
| 1035  | 0.01 | 1.96 | Parp1         | NM_007415    |
| 19005 | 0.01 | 2.16 | Als2cl        | NM_146228    |

Table 5b. Genes up-regulated in the EB library.

| Refseq UCSC ID | Bstat | Fold change | Common name   | Refseq ID    |
|----------------|-------|-------------|---------------|--------------|
| 16427          | 11.24 | 245.51      | Hbb-bh1       | NM_008219    |
| 2964           | 9.91  | 16.76       | Car4          | NM_007607    |
| 14226          | 9.47  | 43.17       | Asb4          | NM_023048    |
| 21211          | 9.11  | 28.00       | Hand2         | NM_010402    |
| 8843           | 8.77  | 20.70       | Dkk1          | NM_010051    |
| 6847           | 8.53  | 7.94        | St3gal6       | NM_018784    |
| 11406          | 8.40  | 42.28       | Car14         | NM_011797    |
| 19444          | 7.51  | 13.57       | Hmgb3         | NM_008253    |
| 18996          | 7.42  | 7.22        | Pthr1         | NM_011199    |
| 10966          | 7.35  | 7.65        | Cldn11        | NM_008770    |
| 2620           | 6.81  | 6.41        | Tmem88        | NM_025915    |
| 2957           | 6.69  | 22.21       | Lhx1          | NM_008498    |
| 16428          | 6.62  | 8.00        | Hbb-y         | NM_008221    |
| 2677           | 6.60  | 7.64        | Alox15        | NM_009660    |
| 11726          | 6.55  | 5.51        | Slc39a8       | NM_026228    |
| 21817          | 6.50  | 10.40       | Evx1          | NM_007966    |
| 10049          | 6.46  | 9.75        | Lmo2          | NM_008505    |
| 18640          | 6.40  | 5.32        | Dapk2         | NM_010019    |
| 2140           | 6.36  | 9.51        | 1500041B16Rik | NM_029861    |
| 19723          | 6.30  | 5.86        | Nxf7          | NM_130888    |
| 13035          | 6.30  | 5.88        | C1qdc2        | NM_026125    |
| 11132          | 6.23  | 20.82       | Tdo2          | NM_019911    |
| 12231          | 6.20  | 43.36       | Cer1          | NM_009887    |
| 3097           | 6.15  | 5.24        | Skap1         | NM_001033186 |
| 6586           | 6.14  | 6.38        | Klhl6         | NM_183390    |
| 3257           | 6.13  | 7.34        | Ramp2         | NM_019444    |
| 11243          | 5.83  | 6.17        | Efna1         | NM_010107    |
| 7976           | 5.83  | 4.00        | AK220484      | NM_001083628 |
| 713            | 5.80  | 9.94        | Tnni1         | NM_021467    |

|       |      |        |               |              |
|-------|------|--------|---------------|--------------|
| 4083  | 5.74 | 4.83   | Gsc           | NM_010351    |
| 1319  | 5.68 | 4.17   | Cd24a         | NM_009846    |
| 4939  | 5.58 | 7.33   | Emb           | NM_010330    |
| 17307 | 5.49 | 4.86   | Pdlim3        | NM_016798    |
| 1259  | 5.49 | 7.49   | Hey2          | NM_013904    |
| 21552 | 5.40 | 29.63  | Capn6         | NM_007603    |
| 5789  | 5.33 | 4.68   | Cthrc1        | NM_026778    |
| 19696 | 5.32 | 4.29   | Tspan6        | NM_019656    |
| 5827  | 5.31 | 6.03   | Enpp2         | NM_015744    |
| 5329  | 5.23 | 4.20   | Slc7a8        | NM_016972    |
| 19641 | 5.12 | 4.53   | Slc16a2       | NM_009197    |
| 19176 | 5.09 | 7.20   | Pim2          | NM_138606    |
| 5974  | 5.04 | 6.91   | Foxh1         | NM_007989    |
| 52    | 4.98 | 5.91   | Crispld1      | NM_031402    |
| 1825  | 4.96 | 6.81   | Kcnmb4        | NM_021452    |
| 5453  | 4.94 | 8.65   | Gata4         | NM_008092    |
| 10778 | 4.79 | 4.40   | Bmp7          | NM_007557    |
| 4937  | 4.78 | 6.78   | Isl1          | NM_021459    |
| 22500 | 4.75 | 7.45   | Has2          | NM_008216    |
| 5688  | 4.72 | 6.34   | Egflam        | NM_178748    |
| 5541  | 4.72 | 4.06   | Rcbtb2        | NM_134083    |
| 1255  | 4.59 | 8.56   | Rspo3         | NM_028351    |
| 11134 | 4.51 | 3.87   | Gucy1b3       | NM_017469    |
| 20568 | 4.45 | 6.51   | Grrp1         | NM_001099296 |
| 11057 | 4.44 | 2.90   | Pfn2          | NM_019410    |
| 19679 | 4.38 | 6.14   | Zfp711        | NM_177747    |
| 3     | 4.35 | 13.28  | Sox17         | NM_011441    |
| 15705 | 4.31 | 4.20   | Dll3          | NM_007866    |
| 19771 | 4.27 | 4.98   | Tsc22d3       | NM_001077364 |
| 518   | 4.26 | 2.92   | Kif1a         | NM_008440    |
| 17626 | 4.21 | 6.76   | Irx3          | NM_008393    |
| 2219  | 4.19 | 125.48 | Hba-x         | NM_010405    |
| 7428  | 4.18 | 4.16   | H2-Oa         | NM_008206    |
| 8885  | 4.16 | 9.51   | Cyp26a1       | NM_007811    |
| 19154 | 4.14 | 3.19   | Dgkk          | NM_177914    |
| 9600  | 4.12 | 4.92   | Stk39         | NM_016866    |
| 22431 | 4.07 | 4.88   | Cdh5          | NM_009868    |
| 18924 | 4.07 | 4.81   | 6230427J02Rik | NM_026597    |
| 19656 | 4.06 | 4.14   | Gm784         | NM_001007580 |
| 2625  | 4.04 | 4.13   | Atp1b2        | NM_013415    |
| 1244  | 3.99 | 3.01   | C030003D03Rik | NM_029881    |
| 10884 | 3.99 | 3.35   | Pxmp3         | NM_008994    |
| 6646  | 3.93 | 8.55   | Leprel1       | NM_173379    |
| 11517 | 3.91 | 3.65   | Slc16a1       | NM_009196    |
| 621   | 3.91 | 34.74  | Cxcr4         | NM_009911    |
| 16652 | 3.91 | 3.11   | Tmc7          | NM_172476    |
| 1122  | 3.90 | 4.41   | Camk1g        | NM_144817    |
| 14212 | 3.89 | 3.36   | Calcr         | NM_007588    |



|       |      |       |           |              |
|-------|------|-------|-----------|--------------|
| 8991  | 3.88 | 6.26  | Fgf8      | NM_010205    |
| 19796 | 3.87 | 9.89  | Amot      | NM_153319    |
| 16824 | 3.86 | 2.96  | Fgfr2     | NM_010207    |
| 22113 | 3.84 | 3.24  | Adssl1    | NM_007421    |
| 380   | 3.81 | 2.78  | Accn4     | NM_183022    |
| 4518  | 3.76 | 6.88  | Cap2      | NM_026056    |
| 19350 | 3.75 | 2.73  | Smarca1   | NM_053123    |
| 15263 | 3.74 | 5.26  | Bhlhb3    | NM_024469    |
| 21011 | 3.71 | 2.64  | Dab2      | NM_023118    |
| 4942  | 3.70 | 10.99 | Fgf10     | NM_008002    |
| 10712 | 3.69 | 4.51  | Cd40      | NM_011611    |
| 9035  | 3.67 | 2.71  | Obfc1     | NM_175360    |
| 18229 | 3.67 | 2.61  | Pknox2    | NM_001029838 |
| 13321 | 3.66 | 4.59  | Ldb2      | NM_001077398 |
| 14334 | 3.66 | 11.55 | Podxl     | NM_013723    |
| 20831 | 3.65 | 20.75 | Foxa2     | NM_010446    |
| 11821 | 3.65 | 4.47  | Slc44a5   | NM_001081263 |
| 18170 | 3.64 | 8.64  | Bmper     | NM_028472    |
| 5758  | 3.63 | 3.27  | Laptm4b   | NM_033521    |
| 6664  | 3.61 | 4.77  | Hes1      | NM_008235    |
| 2430  | 3.55 | 16.01 | Hand1     | NM_008213    |
| 15315 | 3.53 | 3.96  | Cdc42ep5  | NM_021454    |
| 20704 | 3.51 | 3.40  | Rshl2b    | NM_001083945 |
| 19898 | 3.49 | 2.49  | Gpm6b     | NM_023122    |
| 18707 | 3.45 | 8.13  | Bmp5      | NM_007555    |
| 13593 | 3.40 | 4.35  | Ptpn13    | NM_011204    |
| 19741 | 3.38 | 3.05  | Tceal1    | NM_146236    |
| 4517  | 3.37 | 6.40  | Rbm24     | NM_001081425 |
| 5415  | 3.36 | 2.65  | Efha1     | NM_028643    |
| 19577 | 3.36 | 5.69  | Asb12     | NM_080858    |
| 13139 | 3.34 | 4.93  | Smarcd3   | NM_025891    |
| 19839 | 3.26 | 19.53 | Spin2     | NM_001005370 |
| 16775 | 3.23 | 3.09  | Zfp768    | NM_146202    |
| 4445  | 3.23 | 5.25  | Serpinb6b | NM_011454    |
| 9615  | 3.22 | 2.76  | Klhl23    | NM_177784    |
| 15063 | 3.21 | 2.69  | Libr      | NM_010736    |
| 8237  | 3.20 | 3.24  | Zfp608    | NM_175751    |
| 2243  | 3.20 | 3.91  | Slit3     | NM_011412    |
| 22352 | 3.19 | 3.41  | Smoc2     | NM_022315    |
| 21500 | 3.19 | 2.74  | Snn       | NM_009223    |
| 20275 | 3.14 | 3.19  | Ppp1r3c   | NM_016854    |
| 10476 | 3.13 | 2.88  | Snph      | NM_198214    |
| 8218  | 3.10 | 2.48  | Sema6a    | NM_018744    |
| 107   | 3.10 | 38.28 | Cfc1      | NM_007685    |
| 4932  | 3.09 | 5.15  | Fst       | NM_008046    |
| 6168  | 3.08 | 2.64  | AW049604  | NM_134096    |
| 15070 | 3.06 | 4.10  | Ntf3      | NM_008742    |
| 11667 | 3.05 | 12.39 | Prss12    | NM_008939    |

|       |      |       |               |              |
|-------|------|-------|---------------|--------------|
| 21753 | 3.04 | 27.64 | Ttr           | NM_013697    |
| 13367 | 3.01 | 4.09  | Ugdh          | NM_009466    |
| 16985 | 3.00 | 2.71  | Tnnt3         | NM_011620    |
| 3959  | 2.96 | 2.32  | Npc2          | NM_023409    |
| 13565 | 2.95 | 14.24 | Fgf5          | NM_010203    |
| 11236 | 2.94 | 2.31  | Thbs3         | NM_013691    |
| 10329 | 2.92 | 2.60  | Sirpa         | NM_007547    |
| 7454  | 2.91 | 2.65  | Ppt2          | NM_019441    |
| 3929  | 2.90 | 4.21  | Dpf3          | NM_058212    |
| 9709  | 2.90 | 2.43  | Calcr1        | NM_018782    |
| 19392 | 2.90 | 11.86 | Cxx1c         | NM_028375    |
| 10009 | 2.89 | 4.04  | Chst1         | NM_023850    |
| 4265  | 2.89 | 2.41  | Elmo1         | NM_080288    |
| 21683 | 2.87 | 4.08  | Gamt          | NM_010255    |
| 6182  | 2.86 | 2.98  | Mapk12        | NM_013871    |
| 5214  | 2.86 | 2.72  | Peli2         | NM_033602    |
| 1372  | 2.85 | 3.01  | Ddit4         | NM_029083    |
| 12402 | 2.84 | 2.59  | 2310026E23Rik | NM_026279    |
| 2534  | 2.78 | 4.28  | Mfap4         | NM_029568    |
| 5295  | 2.78 | 3.44  | Sall2         | NM_015772    |
| 7470  | 2.75 | 2.45  | Zbtb12        | NM_198886    |
| 3778  | 2.73 | 3.38  | 1110002B05Rik | NM_134054    |
| 2901  | 2.68 | 2.76  | Tmem98        | NM_029537    |
| 3162  | 2.66 | 2.61  | Thra          | NM_178060    |
| 7869  | 2.66 | 5.93  | Rasgrp3       | NM_207246    |
| 8234  | 2.66 | 20.57 | Prdm6         | NM_001033281 |
| 21054 | 2.65 | 2.74  | Alas2         | NM_001102446 |
| 11131 | 2.64 | 3.79  | Ctso          | NM_177662    |
| 902   | 2.63 | 3.88  | Rgs4          | NM_009062    |
| 3176  | 2.61 | 2.46  | Smarce1       | NM_020618    |
| 14496 | 2.61 | 9.55  | Tmem176b      | NM_023056    |
| 19394 | 2.60 | 3.08  | Cxx1b         | NM_001018063 |
| 11925 | 2.58 | 2.46  | Rragd         | NM_027491    |
| 13190 | 2.55 | 2.58  | Khk           | NM_008439    |
| 1246  | 2.53 | 3.16  | L3mbtl3       | NM_172787    |
| 365   | 2.52 | 2.28  | BC038286      | NM_170755    |
| 2969  | 2.51 | 9.02  | Tbx2          | NM_009324    |
| 19184 | 2.51 | 4.72  | Gata1         | NM_008089    |
| 19832 | 2.46 | 3.37  | Mageh1        | NM_023788    |
| 19524 | 2.46 | 2.50  | Fundc2        | NM_026126    |
| 14578 | 2.44 | 2.53  | Pigy          | NM_025574    |
| 9700  | 2.43 | 17.70 | Frzb          | NM_011356    |
| 11279 | 2.41 | 2.39  | Slc27a3       | NM_011988    |
| 13247 | 2.41 | 3.19  | Gm1673        | NM_001033458 |
| 20199 | 2.39 | 5.97  | Tmem176a      | NM_025326    |
| 19585 | 2.38 | 4.13  | Heph          | NM_010417    |
| 6498  | 2.38 | 7.06  | Snai2         | NM_011415    |
| 1540  | 2.37 | 2.51  | 2610008E11Rik | NM_001004362 |

|       |      |       |               |              |
|-------|------|-------|---------------|--------------|
| 11864 | 2.37 | 2.21  | Ccne2         | NM_001037134 |
| 18049 | 2.37 | 2.45  | BC017612      | NM_133214    |
| 6217  | 2.35 | 2.52  | Pphln1        | NM_146062    |
| 18342 | 2.34 | 2.86  | Zfp202        | NM_030713    |
| 13428 | 2.33 | 18.10 | Kdr           | NM_010612    |
| 19733 | 2.32 | 2.44  | Tceal8        | NM_025703    |
| 21785 | 2.31 | 2.73  | Tspan5        | NM_019571    |
| 6905  | 2.28 | 4.30  | Samsn1        | NM_023380    |
| 16288 | 2.27 | 5.78  | Mogat2        | NM_177448    |
| 8071  | 2.26 | 4.24  | Wnt8a         | NM_009290    |
| 4568  | 2.24 | 10.75 | Msx2          | NM_013601    |
| 21677 | 2.23 | 2.57  | Dusp10        | NM_022019    |
| 16265 | 2.17 | 2.31  | Alg8          | NM_199035    |
| 19352 | 2.16 | 2.97  | Apln          | NM_013912    |
| 21152 | 2.16 | 3.42  | Col23a1       | NM_153393    |
| 3957  | 2.14 | 9.07  | 7420416P09Rik | NM_001033776 |
| 11723 | 2.13 | 2.08  | Zcd2          | NM_025902    |
| 8642  | 2.11 | 2.39  | 2810441K11Rik | NM_026798    |
| 19217 | 2.10 | 2.77  | Tspan7        | NM_019634    |
| 21940 | 2.10 | 7.81  | Otx2          | NM_144841    |
| 17663 | 2.10 | 7.57  | Dok4          | NM_053246    |
| 7308  | 2.10 | 2.82  | Spdef         | NM_013891    |
| 20508 | 2.09 | 20.62 | Tnnc1         | NM_009393    |
| 2180  | 2.09 | 2.21  | Bcl11a        | NM_016707    |
| 19074 | 2.08 | 2.14  | Eif1b         | NM_026892    |
| 5551  | 2.03 | 3.31  | Lcp1          | NM_008879    |
| 2538  | 2.02 | 2.67  | Grap          | NM_027817    |
| 6996  | 2.01 | 3.29  | Pigp          | NM_019543    |
| 793   | 2.01 | 2.55  | Ier5          | NM_010500    |
| 957   | 1.97 | 2.28  | Atp1a2        | NM_178405    |
| 9183  | 1.97 | 2.65  | Commd3        | NM_147778    |
| 12063 | 1.96 | 2.41  | Tmod1         | NM_021883    |
| 10300 | 1.96 | 2.29  | Kcnp3         | NM_019789    |
| 4734  | 1.95 | 3.46  | Irx1          | NM_010573    |
| 3360  | 1.95 | 2.53  | Limd2         | NM_172397    |
| 10145 | 1.94 | 3.74  | Actc1         | NM_009608    |
| 15800 | 1.93 | 6.93  | Etv2          | NM_007959    |
| 9566  | 1.92 | 2.98  | Dapl1         | NM_029723    |
| 6214  | 1.92 | 2.30  | Yaf2          | NM_024189    |
| 13141 | 1.90 | 2.94  | Wdr86         | NM_001081441 |
| 4653  | 1.87 | 6.18  | Gas1          | NM_008086    |
| 18204 | 1.86 | 2.90  | Kcnj5         | NM_010605    |
| 22077 | 1.86 | 2.24  | Cdkn1b        | NM_009875    |
| 9592  | 1.85 | 2.05  | Ttc21b        | NM_001047604 |
| 20476 | 1.84 | 3.08  | Gulp1         | NM_027506    |
| 15642 | 1.82 | 2.71  | B3gnt8        | NM_001036740 |
| 1347  | 1.81 | 2.41  | Gja1          | NM_010288    |
| 14736 | 1.80 | 2.75  | Cml1          | NM_023160    |

|       |      |       |               |              |
|-------|------|-------|---------------|--------------|
| 2849  | 1.78 | 2.47  | Tlcd1         | NM_026708    |
| 105   | 1.78 | 3.72  | Ptpn18        | NM_011206    |
| 21919 | 1.77 | 10.20 | Fgf3          | NM_008007    |
| 2712  | 1.75 | 4.13  | 6330403K07Rik | NM_134022    |
| 14764 | 1.75 | 3.41  | Prokr1        | NM_021381    |
| 22249 | 1.71 | 2.97  | Foxb1         | NM_022378    |
| 11784 | 1.71 | 2.50  | Mcoln3        | NM_134160    |
| 9737  | 1.71 | 16.39 | Agtrl1        | NM_011784    |
| 9261  | 1.70 | 3.50  | BC029214      | NM_153557    |
| 49    | 1.68 | 2.89  | Jph1          | NM_020604    |
| 7947  | 1.67 | 6.40  | Bambi         | NM_026505    |
| 10179 | 1.67 | 2.48  | Zfyve19       | NM_028054    |
| 19387 | 1.67 | 13.43 | Plac1         | NM_019538    |
| 17620 | 1.67 | 3.11  | Tox3          | NM_172913    |
| 19759 | 1.66 | 3.29  | Mum111        | NM_175541    |
| 11790 | 1.66 | 3.32  | Gng5          | NM_010318    |
| 98    | 1.66 | 2.42  | Bag2          | NM_145392    |
| 11926 | 1.65 | 2.08  | Ube2j1        | NM_019586    |
| 1953  | 1.64 | 2.29  | Rps26         | NM_013765    |
| 14242 | 1.61 | 2.19  | Ndufa4        | NM_010886    |
| 12456 | 1.61 | 2.03  | Urod          | NM_009478    |
| 4803  | 1.60 | 2.25  | Serinc5       | NM_172588    |
| 14437 | 1.60 | 2.23  | 3321401G04Rik | NM_029930    |
| 7484  | 1.60 | 2.09  | Ddah2         | NM_016765    |
| 9248  | 1.59 | 2.50  | Ssna1         | NM_023464    |
| 7971  | 1.59 | 2.14  | Colec12       | NM_130449    |
| 21945 | 1.58 | 2.09  | Lsm2          | NM_001110101 |
| 8802  | 1.56 | 2.18  | 2900009I07Rik | NM_026520    |
| 14971 | 1.55 | 2.02  | Rad52         | NM_011236    |
| 13601 | 1.53 | 3.49  | Sparc11       | NM_010097    |
| 7662  | 1.52 | 2.29  | 1700027N10Rik | NM_029338    |
| 17012 | 1.50 | 3.27  | Tmem16a       | NM_178642    |
| 13742 | 1.50 | 3.31  | Msi1          | NM_008629    |
| 18460 | 1.50 | 3.84  | Pih1d2        | NM_028300    |
| 8672  | 1.50 | 12.77 | Ms4a4d        | NM_025658    |
| 13129 | 1.50 | 2.13  | Abcb8         | NM_029020    |
| 9671  | 1.48 | 2.18  | Ttc30b        | NM_028235    |
| 19823 | 1.47 | 2.04  | Hsd17b10      | NM_016763    |
| 13995 | 1.44 | 2.45  | Rabl5         | NM_026073    |
| 21747 | 1.43 | 2.19  | Ripk4         | NM_023663    |
| 16161 | 1.41 | 28.59 | Mesp1         | NM_008588    |
| 10889 | 1.41 | 2.85  | Heyl          | NM_010423    |
| 3762  | 1.41 | 2.67  | Stxbp6        | NM_144552    |
| 1090  | 1.40 | 3.88  | Prox1         | NM_008937    |
| 22548 | 1.40 | 2.60  | Gdap111       | NM_144891    |
| 12414 | 1.40 | 5.77  | Tal1          | NM_011527    |
| 5134  | 1.38 | 7.03  | Lrrc18        | NM_026253    |
| 18042 | 1.38 | 2.24  | Panx1         | NM_019482    |

|       |      |       |               |              |
|-------|------|-------|---------------|--------------|
| 7018  | 1.37 | 6.87  | Pcp4          | NM_008791    |
| 178   | 1.35 | 1.96  | Kdelc1        | NM_023645    |
| 3260  | 1.33 | 2.10  | Ccdc56        | NM_026618    |
| 12829 | 1.32 | 3.65  | Mfap2         | NM_008546    |
| 18022 | 1.32 | 4.48  | 9230110C19Rik | NM_199017    |
| 1098  | 1.32 | 3.40  | Nenf          | NM_025424    |
| 11886 | 1.31 | 2.55  | Decr1         | NM_026172    |
| 18877 | 1.30 | 1.96  | Rpl29         | NM_009082    |
| 6194  | 1.29 | 3.21  | Cpt1b         | NM_009948    |
| 1937  | 1.28 | 2.00  | Tmem4         | NM_019953    |
| 13296 | 1.27 | 2.26  | Stx18         | NM_026959    |
| 9269  | 1.27 | 2.37  | Phpt1         | NM_029293    |
| 17896 | 1.26 | 2.03  | Mthfsd        | NM_172761    |
| 4204  | 1.25 | 3.60  | Akr1c19       | NM_001013785 |
| 20434 | 1.24 | 2.99  | 2810030E01Rik | NM_028317    |
| 14618 | 1.24 | 2.04  | Rpia          | NM_009075    |
| 14948 | 1.23 | 2.70  | Cxcl12        | NM_001012477 |
| 1273  | 1.22 | 2.62  | Tspyl4        | NM_030203    |
| 5330  | 1.22 | 1.88  | Homez         | NM_183174    |
| 13241 | 1.21 | 2.05  | Tmem129       | NM_026698    |
| 14930 | 1.20 | 2.03  | Ift122        | NM_031177    |
| 11660 | 1.19 | 2.30  | Pde5a         | NM_153422    |
| 18934 | 1.19 | 1.99  | Tcta          | NM_133986    |
| 7899  | 1.18 | 2.00  | AW548124      | NM_134117    |
| 901   | 1.17 | 13.76 | Rgs5          | NM_009063    |
| 3826  | 1.17 | 2.15  | Klhdc2        | NM_027117    |
| 7837  | 1.14 | 1.96  | Epb4.113      | NM_013813    |
| 1819  | 1.14 | 1.90  | Thap2         | NM_025780    |
| 4462  | 1.14 | 2.86  | 3110004L20Rik | NM_001033167 |
| 8800  | 1.13 | 2.13  | Fxn           | NM_008044    |
| 899   | 1.09 | 4.33  | Pbx1          | NM_183355    |
| 18547 | 1.08 | 2.88  | Cyp11a1       | NM_009992    |
| 807   | 1.05 | 2.40  | Soat1         | NM_009230    |
| 19578 | 1.05 | 2.12  | AK129302      | NM_001003916 |
| 3095  | 1.05 | 10.82 | Hoxb2         | NM_134032    |
| 3107  | 1.03 | 2.40  | Sp6           | NM_031183    |
| 7026  | 1.01 | 2.23  | 5830404H04Rik | NM_174847    |
| 7853  | 1.00 | 4.40  | Lbh           | NM_029999    |
| 12376 | 0.99 | 2.84  | Gpx7          | NM_024198    |
| 8812  | 0.97 | 2.75  | Smarca2       | NM_011416    |
| 12095 | 0.97 | 2.85  | 2810432L12Rik | NM_025944    |
| 11523 | 0.96 | 2.00  | St7l          | NM_153091    |
| 16314 | 0.96 | 2.01  | Chchd8        | NM_183270    |
| 5518  | 0.95 | 2.38  | Bin3          | NM_021328    |
| 11032 | 0.95 | 1.96  | Lhfp          | NM_175386    |
| 19816 | 0.94 | 2.57  | Maged2        | NM_030700    |
| 6036  | 0.93 | 3.27  | 1700088E04Rik | NM_138581    |
| 9330  | 0.93 | 4.26  | Olfm1         | NM_001038613 |

|       |      |      |               |              |
|-------|------|------|---------------|--------------|
| 17606 | 0.93 | 2.23 | Cbln1         | NM_019626    |
| 9450  | 0.93 | 3.22 | Pbx3          | NM_016768    |
| 15648 | 0.92 | 3.93 | Tgfb1         | NM_011577    |
| 86    | 0.91 | 1.89 | Lmbrd1        | NM_026719    |
| 17676 | 0.91 | 3.06 | Mmp15         | NM_008609    |
| 9408  | 0.90 | 1.88 | Ppapdc3       | NM_145521    |
| 235   | 0.90 | 1.90 | Ppil3         | NM_027351    |
| 19248 | 0.89 | 2.29 | Slc9a7        | NM_177353    |
| 19683 | 0.88 | 2.41 | Klhl4         | NM_172781    |
| 22116 | 0.87 | 2.18 | 1700010I14Rik | NM_025851    |
| 21756 | 0.86 | 3.59 | Ppic          | NM_008908    |
| 6181  | 0.85 | 2.37 | Hdac10        | NM_199198    |
| 19730 | 0.85 | 1.99 | Bex2          | NM_009749    |
| 6851  | 0.85 | 2.34 | Cldnd1        | NM_171826    |
| 13089 | 0.84 | 2.17 | Sema3a        | NM_009152    |
| 10010 | 0.84 | 2.21 | Syt13         | NM_030725    |
| 17006 | 0.83 | 2.10 | Mrgpre        | NM_175534    |
| 2213  | 0.82 | 3.61 | Nsg2          | NM_008741    |
| 16862 | 0.80 | 1.82 | Uros          | NM_009479    |
| 18388 | 0.80 | 2.27 | Rps25         | NM_024266    |
| 19298 | 0.78 | 2.52 | Sep-06        | NM_019942    |
| 19094 | 0.78 | 1.96 | Tmem16k       | NM_133979    |
| 11873 | 0.78 | 1.82 | Tmem67        | NM_177861    |
| 17696 | 0.78 | 1.89 | Cmtm3         | NM_024217    |
| 22370 | 0.78 | 2.18 | Pnliprp2      | NM_011128    |
| 2978  | 0.77 | 2.29 | Pthr2         | NM_175004    |
| 6740  | 0.76 | 2.32 | Slc15a2       | NM_021301    |
| 18851 | 0.75 | 3.08 | Tmem108       | NM_178638    |
| 18693 | 0.74 | 2.15 | Arpp19        | NM_021548    |
| 16786 | 0.74 | 2.86 | Zfp629        | NM_177226    |
| 14870 | 0.74 | 2.48 | Lrrn1         | NM_008516    |
| 2961  | 0.71 | 2.42 | Pigw          | NM_027388    |
| 2718  | 0.71 | 2.11 | 6720460F02Rik | NM_144526    |
| 10385 | 0.70 | 5.62 | B430119L13Rik | NM_177303    |
| 19860 | 0.69 | 2.03 | Sh3kbp1       | NM_021389    |
| 6430  | 0.69 | 2.03 | Nmr1l         | NM_026393    |
| 20480 | 0.67 | 2.41 | Lrrfip1       | NM_008515    |
| 14353 | 0.66 | 3.58 | Slc13a4       | NM_172892    |
| 11706 | 0.65 | 2.31 | Papss1        | NM_011863    |
| 2396  | 0.64 | 5.23 | Pdlim4        | NM_019417    |
| 22279 | 0.64 | 2.19 | Gcgr          | NM_008101    |
| 15643 | 0.64 | 3.46 | B3gnt8        | NM_146184    |
| 17267 | 0.63 | 3.05 | 6430573F11Rik | NM_176952    |
| 8486  | 0.63 | 1.97 | Yif1a         | NM_026553    |
| 8634  | 0.62 | 1.97 | Fen1          | NM_007999    |
| 11629 | 0.61 | 1.87 | Cdc14a        | NM_001080818 |
| 19151 | 0.61 | 2.48 | Nudt10        | NM_001031664 |
| 3977  | 0.61 | 1.95 | 0610007P14Rik | NM_021446    |

|       |      |       |               |              |
|-------|------|-------|---------------|--------------|
| 9254  | 0.60 | 2.18  | Uap111        | NM_001033293 |
| 9523  | 0.59 | 1.99  | Rpl35         | NM_025592    |
| 19186 | 0.58 | 3.06  | Suv39h1       | NM_011514    |
| 19504 | 0.58 | 1.77  | Taz           | NM_181516    |
| 19383 | 0.58 | 6.00  | Gpc3          | NM_016697    |
| 3022  | 0.57 | 2.39  | Tmem100       | NM_026433    |
| 16986 | 0.57 | 3.64  | Mrpl23        | NM_011288    |
| 4964  | 0.56 | 2.70  | LOC544988     | NM_001024712 |
| 6659  | 0.55 | 2.08  | Hrasls        | NM_013751    |
| 5027  | 0.55 | 2.06  | Fut11         | NM_028428    |
| 687   | 0.55 | 2.55  | Adora1        | NM_001039510 |
| 7070  | 0.52 | 3.89  | T             | NM_009309    |
| 15043 | 0.52 | 1.85  | Ptms          | NM_026988    |
| 5829  | 0.48 | 1.88  | 2600005O03Rik | NM_183089    |
| 4025  | 0.47 | 2.25  | 2610021K21Rik | NM_030172    |
| 19719 | 0.47 | 2.64  | Tceal6        | NM_025355    |
| 18000 | 0.47 | 1.97  | Gria4         | NM_019691    |
| 20742 | 0.46 | 2.39  | 1500011H22Rik | NM_026883    |
| 1491  | 0.44 | 2.07  | A130042E20Rik | NM_172550    |
| 18630 | 0.44 | 2.03  | Rbpms2        | NM_028030    |
| 21874 | 0.43 | 1.87  | Rab39b        | NM_175122    |
| 19399 | 0.43 | 2.26  | Zfp449        | NM_030139    |
| 752   | 0.43 | 2.08  | Rgs2          | NM_009061    |
| 9062  | 0.43 | 1.85  | Vt1a          | NM_016862    |
| 19812 | 0.42 | 2.15  | Apex2         | NM_029943    |
| 21872 | 0.42 | 2.13  | Mospd1        | NM_027409    |
| 14230 | 0.41 | 2.23  | Shfm1         | NM_009169    |
| 9096  | 0.41 | 2.65  | Slc18a2       | NM_172523    |
| 5617  | 0.41 | 2.02  | 2610206B13Rik | NM_026047    |
| 18571 | 0.41 | 2.30  | Hexa          | NM_010421    |
| 3729  | 0.41 | 2.87  | Atxn7l4       | NM_028139    |
| 4938  | 0.41 | 2.15  | Parp8         | NM_001081009 |
| 18634 | 0.40 | 3.42  | 2810417H13Rik | NM_026515    |
| 1922  | 0.40 | 1.87  | Naca          | NM_013608    |
| 19164 | 0.40 | 1.89  | Syp           | NM_009305    |
| 11529 | 0.38 | 1.90  | Rap1a         | NM_145541    |
| 16069 | 0.38 | 2.11  | Tmem16e       | NM_177694    |
| 2840  | 0.38 | 1.87  | Sez6          | NM_021286    |
| 1029  | 0.35 | 2.17  | Sccpdh        | NM_178653    |
| 21203 | 0.35 | 2.74  | Prss1         | NM_053243    |
| 10622 | 0.35 | 2.04  | Lbp           | NM_008489    |
| 19433 | 0.34 | 1.79  | Ids           | NM_001038990 |
| 19291 | 0.34 | 4.05  | Zcchc12       | NM_028325    |
| 3312  | 0.33 | 2.51  | Ccdc103       | NM_028492    |
| 14950 | 0.32 | 2.61  | Zfp637        | NM_177684    |
| 12168 | 0.29 | 2.07  | Cdc26         | NM_139291    |
| 10042 | 0.29 | 2.06  | Apip          | NM_019735    |
| 17985 | 0.29 | 11.80 | Nrp1          | NM_008737    |

|       |      |       |                    |              |
|-------|------|-------|--------------------|--------------|
| 19670 | 0.28 | 2.42  | Sh3bgrl            | NM_019989    |
| 15277 | 0.26 | 1.96  | Ccdc91             | NM_025911    |
| 14746 | 0.26 | 1.79  | C87436             | NM_146170    |
| 7483  | 0.25 | 2.36  | Clic1              | NM_033444    |
| 3761  | 0.24 | 2.19  | Nrcam              | NM_176930    |
| 11882 | 0.24 | 1.74  | Tmem55a            | NM_028264    |
| 18896 | 0.24 | 1.94  | Tmem115            | NM_019704    |
| 3661  | 0.23 | 1.83  | Trib2              | NM_144551    |
| 19538 | 0.22 | 1.86  | Tmem47             | NM_138751    |
| 21457 | 0.22 | 2.36  | Pddc1              | NM_172116    |
| 1193  | 0.21 | 3.06  | Slc35d3            | NM_029529    |
| 8781  | 0.20 | 2.08  | 1110059E24Rik      | NM_025423    |
| 2220  | 0.19 | 13.24 | Hba-a1             | NM_008218    |
| 4793  | 0.19 | 3.42  | Ssbp2              | NM_024272    |
| 11845 | 0.17 | 2.23  | Chchd7             | NM_181391    |
| 4279  | 0.17 | 1.97  | OTTMUSG00000000421 | NM_001039115 |
| 19388 | 0.16 | 1.92  | 4632404H22Rik      | NM_030167    |
| 7258  | 0.16 | 1.94  | 2610003J06Rik      | NM_028101    |
| 14502 | 0.16 | 2.67  | Igf2bp3            | NM_023670    |
| 5101  | 0.15 | 2.43  | Glt8d1             | NM_029626    |
| 3441  | 0.15 | 2.10  | Nat9               | NM_025400    |
| 6895  | 0.14 | 2.11  | Chmp2b             | NM_026879    |
| 3654  | 0.12 | 4.32  | Msgn1              | NM_019544    |
| 9291  | 0.12 | 2.05  | D2Bwg1335e         | NM_026828    |
| 22064 | 0.12 | 3.24  | Scand1             | NM_020255    |
| 9267  | 0.12 | 1.77  | Edf1               | NM_021519    |
| 4799  | 0.08 | 1.93  | Dhfr               | NM_010049    |
| 9184  | 0.08 | 2.38  | Bmi1               | NM_007552    |
| 5005  | 0.07 | 2.61  | Rpl15              | NM_025586    |
| 18997 | 0.07 | 8.27  | Myl3               | NM_010859    |
| 18482 | 0.06 | 2.89  | Kdelc2             | NM_212445    |
| 17895 | 0.06 | 14.31 | Foxf1a             | NM_010426    |
| 4814  | 0.06 | 2.19  | Lhfpl2             | NM_172589    |
| 3831  | 0.05 | 2.30  | Cdkl1              | NM_183294    |
| 14580 | 0.03 | 2.18  | AW146242           | NM_146168    |
| 18466 | 0.03 | 3.44  | 1110032A03Rik      | NM_023483    |
| 9198  | 0.02 | 2.18  | Gad2               | NM_008078    |
| 5202  | 0.02 | 2.93  | Cgrf1              | NM_026832    |
| 4989  | 0.01 | 1.89  | Thoc7              | NM_025435    |
| 19659 | 0.01 | 1.80  | Gpr23              | NM_175271    |
| 9666  | 0.00 | 1.71  | Mtx2               | NM_016804    |
| 3564  | 0.00 | 2.71  | Slc25a10           | NM_013770    |
| 22084 | 0.00 | 2.21  | Echdc1             | NM_001110195 |
| 14821 | 0.00 | 3.41  | Fbln2              | NM_007992    |



**Supplementary Table 6.** Identification of full length transcripts by diagnostic sequences.

Diagnostic exons are defined as exon regions which are unique to one transcript in Aceview. Diagnostic junctions are defined as a junction coordinate (donor-acceptor pair) which is unique to one Aceview transcript. (A). Total number of transcripts and Loci in Aceview which have either a diagnostic junction or diagnostic exon. (B). Statistics for diagnostic exons or junctions from the ES and EB SQRL sequencing data.

**A**

|                                          | <b>Number of transcripts</b> | <b>% of total transcripts</b> | <b>Number of loci</b> | <b>% of total loci</b> |
|------------------------------------------|------------------------------|-------------------------------|-----------------------|------------------------|
| <b>Total diagnostic</b>                  | 160156                       | 92.57%                        | 65254                 | 99.83%                 |
| <b>Diagnostic junctions</b>              | 78971                        | 45.65%                        | 31119                 | 47.61%                 |
| <b>Diagnostic exons</b>                  | 138156                       | 79.86%                        | 65254                 | 99.83%                 |
| <b>Combined (both junction and exon)</b> | 56971                        | 32.93%                        | 30130                 | 46.10%                 |

**B**

|                                         | <b>Transcripts (ES)</b> | <b>Loci (ES)</b> | <b>Transcripts (EB)</b> | <b>Loci (EB)</b> |
|-----------------------------------------|-------------------------|------------------|-------------------------|------------------|
| <b>Total diagnostic</b>                 | 53056                   | 31872            | 50881                   | 29606            |
| <b>Diagnostic junctions (2+ tags)</b>   | 10454                   | 7767             | 12884                   | 9018             |
| <b>Diagnostic exons (10+ tags)</b>      | 48017                   | 31302            | 44071                   | 28744            |
| <b>Combined (2+ junction, 10+ exon)</b> | 5415                    | 5058             | 6074                    | 5607             |

**Supplementary Table 7.** Volume and proportion of the mouse genome that falls into the known and predicted regions of transcription defined in Table 1. Genome size includes all “random” contigs available in the mm9 release, and as regions are defined as strand specific, the total number of nucleotides in the genome has been doubled. Note that each of these regions will overlap with other categories (eg. predicted alternative transcripts will contain some known exons, etc.).

|                            | <b>Volume</b> | <b>Proportion</b> |
|----------------------------|---------------|-------------------|
| <b>Mouse genome (mm9):</b> | 5.45 Gb       | 100%              |
| <b>Known expression:</b>   |               |                   |
| <b>Known exons</b>         | 0.27 Gb       | 4.9%              |
| <b>Predicted Exons</b>     | 0.20 Gb       | 3.6%              |
| <b>Novel Expression:</b>   |               |                   |
| <b>Known regions</b>       | 1.90 Gb       | 34.8%             |
| <b>Predicted regions</b>   | 2.84 Gb       | 52.0%             |
| <b>Conserved regions</b>   | 3.83 Gb       | 70.2%             |

**Supplementary Table 8.** Number and proportion of repeat associated tags detected in SQRL libraries, broken down by type of repeat.

| Type of repeat  | number of tags (ES) | % of all tags (ES) | number of tags (EB) | % of all tag (EB) |
|-----------------|---------------------|--------------------|---------------------|-------------------|
| DNA transposons | 421156              | 0.450805           | 313519              | 0.357134          |
| LINE.CR1        | 30843               | 0.033014           | 27182               | 0.030963          |
| LINE.L1         | 4390151             | 4.699212           | 3717364             | 4.234508          |
| LINE.L2         | 244963              | 0.262208           | 203407              | 0.231704          |
| LINE.RTE        | 11229               | 0.01202            | 11108               | 0.012653          |
| Low_complexity  | 1256516             | 1.344973           | 1547150             | 1.762383          |
| LTR.ERV1        | 281533              | 0.301353           | 215263              | 0.245209          |
| LTR.ERVK        | 1369700             | 1.466125           | 1173019             | 1.336205          |
| LTR.ERVL        | 449065              | 0.480679           | 378954              | 0.431673          |
| LTR.MaLR        | 1646508             | 1.76242            | 1308817             | 1.490894          |
| rRNA            | 2712218             | 2.903155           | 2575224             | 2.933478          |
| Satellite       | 224832              | 0.24066            | 130037              | 0.148127          |
| Simple_repeat   | 1124117             | 1.203253           | 1343761             | 1.530699          |
| SINE.Alu        | 1107182             | 1.185126           | 949980              | 1.082137          |
| SINE.B2         | 3000583             | 3.21182            | 1457014             | 1.659708          |
| SINE.B4         | 1180692             | 1.263811           | 985337              | 1.122413          |
| SINE.ID         | 90351               | 0.096712           | 71422               | 0.081358          |
| SINE.MIR        | 256764              | 0.27484            | 201363              | 0.229376          |
| Other           | 540462              | 0.57851            | 502549              | 0.572462          |
| <b>Total</b>    | <b>20338865</b>     | <b>21.7707</b>     | <b>17112470</b>     | <b>19.49309</b>   |

**Supplementary Table 9.** Analysis of natural sense-antisense transcript pairs in ES and EB. The gene set used for this analysis contains 1573 genes with overlap and coding information from Kiyosawa et al., 2006 (PMID: 15781571). To be selected, the tag count must be greater than average of 1 tag start per 6 bases (ie. above the pervasive transcription threshold set in Table 1) within the transcript and expressed in both sense and antisense strand.

**Table S28a – nature of the overlap.**

|             | All  | Convergent     |                   | Divergent      |                   | Full          |                   |
|-------------|------|----------------|-------------------|----------------|-------------------|---------------|-------------------|
|             |      | (tail to tail) |                   | (head to head) |                   | (overlap)     |                   |
|             |      | <i>number</i>  | <i>proportion</i> | <i>number</i>  | <i>proportion</i> | <i>number</i> | <i>proportion</i> |
| Total Pairs | 1573 | 617            | 39.22%            | 582            | 37.00%            | 374           | 23.78%            |
| ES pairs    | 124  | 93             | 75.00%            | 29             | 23.39%            | 1             | 0.81%             |
| EB pairs    | 141  | 99             | 70.21%            | 39             | 27.66%            | 3             | 2.13%             |

**Table S28b – coding status of each pair.**

|          | All | Coding-Coding |                   | Coding-Noncoding |                   | Noncoding-Noncoding |                   |
|----------|-----|---------------|-------------------|------------------|-------------------|---------------------|-------------------|
|          |     | <i>number</i> | <i>proportion</i> | <i>number</i>    | <i>proportion</i> | <i>number</i>       | <i>proportion</i> |
|          |     | Total pairs   | 1573              | 685              | 43.55%            | 719                 | 45.71%            |
| ES pairs | 124 | 110           | 88.71%            | 12               | 9.68%             | 1                   | 0.81%             |
| EB pairs | 141 | 121           | 85.82%            | 19               | 13.48%            | 1                   | 0.71%             |

**Supplementary Table 10.** Exon-junction discovery in SQRL ESC and EB libraries.

Exon-junction sequences (30 nt of donor exon sequence concatenated with 30 nt of acceptor exon sequence) are not expected to map to the genome, unless there have been retro-transposition events – almost 9000 junctions with EST support fall into this category. As we would not be able to accurately map the origin of RNA tags mapping to these junctions sequences, they were removed from the exon-junction library as “uninformative”. Almost half of the “novel” exons match exactly these previously known but uninformative junctions, serving as a positive control for our approach. Novel junctions were then classified into those deriving from known transcripts, and those deriving from novel transcripts.

|       | <b>Known<br/>(uninformative)<br/>junctions</b> | <b>Novel<br/>junctions in<br/>known<br/>transcripts</b> | <b>Novel<br/>junctions in<br/>novel<br/>transcripts</b> | <b>Total</b> |
|-------|------------------------------------------------|---------------------------------------------------------|---------------------------------------------------------|--------------|
| ES    | 12                                             | 7                                                       | 3                                                       | 22           |
| EB    | 30                                             | 18                                                      | 17                                                      | 65           |
| Total | 42                                             | 25                                                      | 20                                                      | 87           |

**Supplementary Table 11.** Single nucleotide polymorphism (SNP) detection in ESC and mEB samples.

High quality SNP predictions were made for each chromosome in both the ESC and EB libraries (See supplementary Figure S21). Of the total SNPs common to both libraries, 20.3% overlap with dbSNP 128. However, when confined to Refseq transcripts, 83.9% of SNPs overlap with dbSNP 128.

|              | <b>ES-all</b> | <b>EB-all</b> | <b>Common to<br/>ES and EB</b> | <b>In dbSNP<br/>(%)</b> | <b>Present in<br/>Refseq</b> | <b>Refseq in<br/>dbSNP (%)</b> |
|--------------|---------------|---------------|--------------------------------|-------------------------|------------------------------|--------------------------------|
| <b>chr1</b>  | 172           | 448           | 162                            | 24.07                   | 33                           | 81.82                          |
| <b>chr2</b>  | 182           | 461           | 171                            | 25.15                   | 44                           | 81.82                          |
| <b>chr3</b>  | 164           | 399           | 154                            | 21.43                   | 34                           | 79.41                          |
| <b>chr4</b>  | 174           | 432           | 166                            | 19.88                   | 46                           | 80.43                          |
| <b>chr5</b>  | 166           | 426           | 153                            | 22.22                   | 45                           | 80.00                          |
| <b>chr6</b>  | 146           | 387           | 140                            | 17.14                   | 27                           | 96.30                          |
| <b>chr7</b>  | 133           | 350           | 130                            | 25.38                   | 41                           | 73.17                          |
| <b>chr8</b>  | 161           | 376           | 154                            | 22.08                   | 60                           | 85.00                          |
| <b>chr9</b>  | 129           | 316           | 122                            | 24.59                   | 51                           | 84.31                          |
| <b>chr10</b> | 145           | 360           | 137                            | 20.44                   | 12                           | 91.67                          |
| <b>chr11</b> | 145           | 372           | 141                            | 24.82                   | 75                           | 72.00                          |
| <b>chr12</b> | 118           | 290           | 115                            | 17.39                   | 19                           | 94.74                          |
| <b>chr13</b> | 144           | 335           | 135                            | 17.04                   | 13                           | 100.00                         |
| <b>chr14</b> | 143           | 345           | 136                            | 16.91                   | 36                           | 91.67                          |
| <b>chr15</b> | 131           | 292           | 122                            | 22.13                   | 25                           | 92.00                          |
| <b>chr16</b> | 135           | 295           | 127                            | 14.96                   | 15                           | 46.67                          |
| <b>chr17</b> | 162           | 364           | 153                            | 18.30                   | 26                           | 92.31                          |
| <b>chr18</b> | 149           | 373           | 141                            | 15.60                   | 21                           | 76.19                          |
| <b>chr19</b> | 106           | 226           | 95                             | 25.26                   | 10                           | 90.00                          |
| <b>chrX</b>  | 174           | 455           | 160                            | 12.50                   | 10                           | 10.00                          |
| <b>chrY</b>  | 12            | 20            | 9                              | 0.00                    | 0                            | 0.00                           |
| <b>chrM</b>  | 0             | 1             | 0                              | 0.00                    | 0                            | 0.00                           |
| <b>Total</b> | 2991          | 7323          | 2823                           | 20.3                    | 643                          | 83.90                          |

**Supplementary Table 12.** Summary of SNP validation results. Genomic regions were amplified using a high fidelity Taq. The resulting PCR products were both sequenced directly and cloned using TOPO-TA (Invitrogen). Individual colonies were picked and sequenced by Sanger-capillary sequencing. Validation was preferentially carried out on Refseq genes where the SNP was predicted to result in a non-synonymous substitution, and then targeted changes in the UTR regions.

| <b>Chromosome</b> | <b>Position</b> | <b>Strand</b> | <b>Gene</b><br><b>UTRme</b> | <b>Predicted</b><br><b>SNP</b> | <b>Amino acid</b><br><b>change</b> | <b>Validated</b> |
|-------------------|-----------------|---------------|-----------------------------|--------------------------------|------------------------------------|------------------|
| chr1              | 174437452       | +             | Tagln2                      | C->T                           | UTR                                | Yes              |
| chr1              | 34501748        | +             | Imp4                        | C->T                           | UTR                                | Yes              |
| chr11             | 84777618        | +             | Car4                        | C->T                           | A->V                               | Yes              |
| chr14             | 22616785        | +             | Samd8                       | A->G                           | UTR                                | Yes              |
| chr18             | 38460154        | +             | Rnf14                       | C->T                           | A->V                               | Yes              |
| chr19             | 41992404        | +             | Pgam1                       | C->T                           | UTR                                | Yes              |
| chr2              | 119453391       | +             | Nusap1                      | A->G                           | K->R                               | Yes              |
| chr3              | 121978860       | +             | Dnttip2                     | T->A                           | L->Q                               | Yes              |
| chr3              | 93330080        | +             | S100a11                     | C->T                           | UTR                                | Yes              |
| chr4              | 15903284        | +             | Nbn                         | C->G                           | Y->F                               | Yes              |
| chr5              | 138548192       | +             | Zkscan1                     | A->G                           | UTR                                | Yes              |
| chr5              | 138548273       | +             | Zkscan1                     | A->G                           | UTR                                | Yes              |
| chr7              | 38752418        | -             | C80913                      | T->C                           | N->D                               | Yes              |
| chr7              | 50209670        | -             | EG668668                    | C->G                           | G->R                               | Yes              |
| chr7              | 5076892         | -             | Rasl2-9                     | T->A                           | E->D                               | No               |
| chr9              | 123371057       | +             | Lars2                       | T->G                           | UTR                                | Yes              |
| chr9              | 57681529        | -             | Arid3b                      | G->T                           | Q->K                               | Yes              |
| chr9              | 64083463        | +             | Uchl4                       | A->T                           | D->E                               | No               |

**Supplementary Table 13.** Summary of variants isolated from the SQRL data from pathways involved in ES cell pluripotency and differentiation. Numbers show transcripts or loci which are identified by at least 2 diagnostic junctions.

**TGF-beta pathway (Ingenuity pathways analysis).**

| Sample | Loci detected | All variants detected | Transcripts per loci |
|--------|---------------|-----------------------|----------------------|
| ES     | 25            | 38                    | 1.52                 |
| EB     | 25            | 41                    | 1.64                 |

**Wnt pathway (Ingenuity pathways analysis)**

| Sample | Loci detected | All variants detected | Transcripts per loci |
|--------|---------------|-----------------------|----------------------|
| ES     | 31            | 46                    | 1.48                 |
| EB     | 33            | 55                    | 1.67                 |

**FGF pathway (Ingenuity pathways analysis)**

| Sample | Loci detected | All variants detected | transcripts per loci |
|--------|---------------|-----------------------|----------------------|
| ES     | 20            | 30                    | 1.50                 |
| EB     | 21            | 36                    | 1.71                 |

**Mouse regulatory network: (PMID: 17940043).**

| Sample | Loci detected | All variants detected | transcripts per loci |
|--------|---------------|-----------------------|----------------------|
| ES     | 26            | 38                    | 1.46                 |
| EB     | 27            | 45                    | 1.67                 |



**Supplementary Table 14.** Details of splice-variants isolated from the SQRL data from pathways involved in ES cell pluripotency and differentiation. The TGFB, Wnt, and FGF pathways were derived from Ingenuity Pathway Analysis ([www.ingenuity.com](http://www.ingenuity.com)), while the Mouse Regulatory Network was derived from PMID: 17940043.

**Table 14a.** The TGFB pathway.

| Gene Name | Ace Name                      | Number of total Diagnostic junctions per variant | Number of Diagnostic junctions present in ES | Counts per Junction - ES | Number of Diagnostic junctions present in EB | Counts per Junction - EB |
|-----------|-------------------------------|--------------------------------------------------|----------------------------------------------|--------------------------|----------------------------------------------|--------------------------|
| Acvr2a    | <a href="#">Acvr2a.aSep07</a> | 3                                                | 2                                            | ,6,4                     | 2                                            | ,19,10                   |
| Acvr2a    | <a href="#">Acvr2a.bSep07</a> | 1                                                | 0                                            | 0                        | 1                                            | ,1                       |
| Axl       | <a href="#">Axl.dSep07</a>    | 1                                                | 1                                            | ,1                       | 0                                            | 0                        |
| Axl       | <a href="#">Axl.aSep07</a>    | 1                                                | 0                                            | 0                        | 1                                            | ,1                       |
| Axl       | <a href="#">Axl.fSep07</a>    | 1                                                | 0                                            | 0                        | 1                                            | ,1                       |
| Bmpr1a    | <a href="#">Bmpr1a.aSep07</a> | 2                                                | 2                                            | ,3,3                     | 2                                            | ,12,3                    |
| Crebbp    | <a href="#">Crebbp.aSep07</a> | 8                                                | 7                                            | ,6,2,1,5,1,8,6           | 8                                            | ,16,13,3,12,4,2,17,11    |
| Crebbp    | <a href="#">Crebbp.bSep07</a> | 1                                                | 0                                            | 0                        | 1                                            | ,6                       |
| Ddr1      | <a href="#">Ddr1.gSep07</a>   | 1                                                | 1                                            | ,1                       | 1                                            | ,2                       |
| Ddr1      | <a href="#">Ddr1.aSep07</a>   | 1                                                | 1                                            | ,2                       | 1                                            | ,2                       |
| Ddr1      | <a href="#">Ddr1.iSep07</a>   | 1                                                | 1                                            | ,1                       | 0                                            | 0                        |
| Egfr      | <a href="#">Egfr.aSep07</a>   | 6                                                | 6                                            | ,1,2,1,2,5,12            | 4                                            | ,3,2,1,9                 |
| Egfr      | <a href="#">Egfr.fSep07</a>   | 1                                                | 2                                            | ,1,1                     | 0                                            | 0                        |
| Ep300     | <a href="#">Ep300.aSep07</a>  | 10                                               | 9                                            | ,3,2,7,1,48,64,1,1,85    | 8                                            | ,9,2,13,87,56,1,2,141    |
| Ep300     | <a href="#">Ep300.fSep07</a>  | 1                                                | 1                                            | ,5                       | 1                                            | ,3                       |
| Fgfr1     | <a href="#">Fgfr1.jSep07</a>  | 1                                                | 1                                            | ,4                       | 1                                            | ,34                      |
| Fgfr1     | <a href="#">Fgfr1.fSep07</a>  | 1                                                | 0                                            | 0                        | 1                                            | ,2                       |
| Grb2      | <a href="#">Grb2.bSep07</a>   | 1                                                | 1                                            | ,252                     | 1                                            | ,98                      |
| Grb2      | <a href="#">Grb2.dSep07</a>   | 1                                                | 1                                            | ,5                       | 1                                            | ,1                       |
| Hnf4a     | <a href="#">Hnf4a.bSep07</a>  | 1                                                | 1                                            | ,1                       | 1                                            | ,1                       |
| Hnf4a     | <a href="#">Hnf4a.gSep07</a>  | 1                                                | 1                                            | ,1                       | 0                                            | 0                        |
| Hras1     | <a href="#">Hras1.eSep07</a>  | 2                                                | 2                                            | ,1,1                     | 1                                            | ,1                       |
| Hras1     | <a href="#">Hras1.dSep07</a>  | 2                                                | 1                                            | ,3                       | 1                                            | ,3                       |
| Kras      | <a href="#">Kras.aSep07</a>   | 2                                                | 2                                            | ,2,3                     | 2                                            | ,2,8                     |
| Kras      | <a href="#">Kras.fSep07</a>   | 1                                                | 1                                            | ,2                       | 1                                            | ,2                       |
| Map2k4    | <a href="#">Map2k4.eSep07</a> | 1                                                | 1                                            | ,4                       | 1                                            | ,4                       |
| Map2k4    | <a href="#">Map2k4.cSep07</a> | 1                                                | 0                                            | 0                        | 1                                            | ,3                       |
| Map3k7    | <a href="#">Map3k7.aSep07</a> | 1                                                | 1                                            | ,14                      | 1                                            | ,28                      |

|           |                                  |    |   |                         |    |                                 |
|-----------|----------------------------------|----|---|-------------------------|----|---------------------------------|
| Map3k7    | <a href="#">Map3k7.iSep07</a>    | 1  | 1 | ,1                      | 1  | ,1                              |
| Map3k7ip1 | <a href="#">Map3k7ip1.aSep07</a> | 1  | 1 | ,3                      | 1  | ,9                              |
| Map3k7ip1 | <a href="#">Map3k7ip1.cSep07</a> | 1  | 1 | ,1                      | 0  | 0                               |
| Mapk1     | <a href="#">Mapk1.dSep07</a>     | 1  | 1 | ,2                      | 1  | ,2                              |
| Mapk1     | <a href="#">Mapk1.aSep07</a>     | 1  | 1 | ,1                      | 1  | ,5                              |
| Mras      | <a href="#">Mras.cSep07</a>      | 1  | 1 | ,1                      | 1  | ,1                              |
| Mras      | <a href="#">Mras.bSep07</a>      | 1  | 1 | ,4                      | 0  | 0                               |
| Nras      | <a href="#">Nras.eSep07</a>      | 3  | 3 | ,2,4,1                  | 2  | ,6,2                            |
| Nras      | <a href="#">Nras.cSep07</a>      | 1  | 1 | ,1                      | 1  | ,11                             |
| Nras      | <a href="#">Nras.aSep07</a>      | 1  | 1 | ,13                     | 1  | ,10                             |
| Nras      | <a href="#">Nras.fSep07</a>      | 1  | 1 | ,4                      | 1  | ,2                              |
| Nras      | <a href="#">Nras.gSep07</a>      | 1  | 0 | 0                       | 1  | ,1                              |
| Ntrk1     | <a href="#">Ntrk1.aSep07</a>     | 12 | 4 | ,5,1,1,1                | 4  | ,1,2,1,1                        |
| Ntrk1     | <a href="#">Ntrk1.bSep07</a>     | 2  | 1 | ,2                      | 0  | 0                               |
| Pdgfrb    | <a href="#">Pdgfrb.aSep07</a>    | 2  | 1 | ,1                      | 1  | ,1                              |
| Pdgfrb    | <a href="#">Pdgfrb.eSep07</a>    | 1  | 0 | 0                       | 1  | ,1                              |
| Ptk7      | <a href="#">Ptk7.aSep07</a>      | 11 | 9 | ,21,3,12,4,130,5,58,5,4 | 10 | ,4,54,17,30,16,389,23,433,10,20 |
| Ptk7      | <a href="#">Ptk7.dSep07</a>      | 1  | 0 | 0                       | 1  | ,1                              |
| Raf1      | <a href="#">Raf1.aSep07</a>      | 1  | 1 | ,5                      | 1  | ,5                              |
| Raf1      | <a href="#">Raf1.jSep07</a>      | 1  | 0 | 0                       | 1  | ,1                              |
| Smad2     | <a href="#">Smad2.eSep07</a>     | 1  | 1 | ,2                      | 0  | 0                               |
| Smad2     | <a href="#">Smad2.cSep07</a>     | 1  | 0 | 0                       | 1  | ,1                              |
| Smad2     | <a href="#">Smad2.dSep07</a>     | 2  | 0 | 0                       | 1  | ,4                              |
| Smad4     | <a href="#">Smad4.bSep07</a>     | 1  | 1 | ,5                      | 1  | ,26                             |
| Smad4     | <a href="#">Smad4.dSep07</a>     | 2  | 1 | ,2                      | 1  | ,4                              |
| Smad4     | <a href="#">Smad4.eSep07</a>     | 1  | 0 | 0                       | 1  | ,3                              |
| Smad7     | <a href="#">Smad7.bSep07</a>     | 1  | 1 | ,3                      | 1  | ,2                              |
| Smad7     | <a href="#">Smad7.aSep07</a>     | 1  | 1 | ,2                      | 1  | ,9                              |
| Smurf1    | <a href="#">Smurf1.aSep07</a>    | 1  | 1 | ,2                      | 1  | ,4                              |
| Smurf1    | <a href="#">Smurf1.fSep07</a>    | 1  | 1 | ,1                      | 1  | ,2                              |
| Tcfe3     | <a href="#">Tcfe3.lSep07</a>     | 1  | 1 | ,48                     | 1  | ,10                             |
| Tcfe3     | <a href="#">Tcfe3.fSep07</a>     | 1  | 1 | ,5                      | 1  | ,2                              |
| Tcfe3     | <a href="#">Tcfe3.jSep07</a>     | 1  | 1 | ,3                      | 1  | ,1                              |
| Tcfe3     | <a href="#">Tcfe3.iSep07</a>     | 2  | 0 | 0                       | 1  | ,1                              |
| Tgfb1     | <a href="#">Tgfb1.aSep07</a>     | 3  | 3 | ,14,2,5                 | 3  | ,115,31,41                      |
| Tgfb1     | <a href="#">Tgfb1.bSep07</a>     | 1  | 0 | 0                       | 1  | ,5                              |
| Tgfb2     | <a href="#">Tgfb2.aSep07</a>     | 2  | 2 | ,11,1                   | 1  | ,5                              |
| Tgfb2     | <a href="#">Tgfb2.bSep07</a>     | 1  | 1 | ,4                      | 1  | ,1                              |
| Tgfb1     | <a href="#">Tgfb1.cSep07</a>     | 1  | 1 | ,1                      | 1  | ,1                              |
| Tgfb1     | <a href="#">Tgfb1.bSep07</a>     | 1  | 0 | 0                       | 1  | ,1                              |
| Tgfb2     | <a href="#">Tgfb2.aSep07</a>     | 1  | 1 | ,1                      | 0  | 0                               |

|        |                               |   |   |   |   |    |
|--------|-------------------------------|---|---|---|---|----|
| Tgfbr2 | <a href="#">Tgfbr2.bSep07</a> | 1 | 0 | 0 | 1 | ,1 |
|--------|-------------------------------|---|---|---|---|----|

**Table 14b.** The Wnt Pathway.

| Gene Name | Ace Name                       | Number of total Diagnostic junctions per variant | Number of Diagnostic junctions present in ES | Counts per Junction - ES | Number of Diagnostic junctions present in EB | Counts per Junction - EB |
|-----------|--------------------------------|--------------------------------------------------|----------------------------------------------|--------------------------|----------------------------------------------|--------------------------|
| Acvr2a    | <a href="#">Acvr2a.aSep07</a>  | 3                                                | 2                                            | ,6,4                     | 2                                            | ,19,10                   |
| Acvr2a    | <a href="#">Acvr2a.bSep07</a>  | 1                                                | 0                                            | 0                        | 1                                            | ,1                       |
| Akt2      | <a href="#">Akt2.aSep07</a>    | 2                                                | 1                                            | ,1                       | 1                                            | ,1                       |
| Akt2      | <a href="#">Akt2.qSep07</a>    | 2                                                | 1                                            | ,1                       | 1                                            | ,1                       |
| Akt3      | <a href="#">Akt3.aSep07</a>    | 4                                                | 4                                            | ,2,166,39,26             | 5                                            | ,3,329,65,96,3           |
| Akt3      | <a href="#">Akt3.bSep07</a>    | 3                                                | 3                                            | ,1,2,1                   | 2                                            | ,5,15                    |
| Akt3      | <a href="#">Akt3.eSep07</a>    | 1                                                | 1                                            | ,1                       | 1                                            | ,3                       |
| Akt3      | <a href="#">Akt3.cSep07</a>    | 1                                                | 0                                            | 0                        | 1                                            | ,2                       |
| Apc       | <a href="#">Apc.aSep07</a>     | 2                                                | 2                                            | ,6,7                     | 2                                            | ,5,10                    |
| Apc       | <a href="#">Apc.fSep07</a>     | 1                                                | 1                                            | ,1                       | 1                                            | ,3                       |
| Axin1     | <a href="#">Axin1.aSep07</a>   | 5                                                | 3                                            | ,4,1,14                  | 4                                            | ,1,10,2,17               |
| Axin1     | <a href="#">Axin1.bSep07</a>   | 2                                                | 2                                            | ,1,24                    | 2                                            | ,3,40                    |
| Axin2     | <a href="#">Axin2.aSep07</a>   | 5                                                | 4                                            | ,7,1,1,12                | 4                                            | ,3,7,1,22                |
| Axin2     | <a href="#">Axin2.bSep07</a>   | 1                                                | 1                                            | ,2                       | 1                                            | ,15                      |
| Cd44      | <a href="#">Cd44.cSep07</a>    | 1                                                | 1                                            | ,1                       | 1                                            | ,2                       |
| Cd44      | <a href="#">Cd44.eSep07</a>    | 1                                                | 1                                            | ,2                       | 1                                            | ,14                      |
| Cdkn2a    | <a href="#">Cdkn2a.bSep07</a>  | 1                                                | 1                                            | ,5                       | 1                                            | ,2                       |
| Cdkn2a    | <a href="#">Cdkn2a.aSep07</a>  | 1                                                | 1                                            | ,2                       | 0                                            | 0                        |
| Csnk1a1   | <a href="#">Csnk1a1.aSep07</a> | 1                                                | 1                                            | ,12                      | 1                                            | ,22                      |
| Csnk1a1   | <a href="#">Csnk1a1.kSep07</a> | 1                                                | 1                                            | ,16                      | 1                                            | ,13                      |
| Csnk1d    | <a href="#">Csnk1d.pSep07</a>  | 2                                                | 0                                            | 0                        | 2                                            | ,1,2                     |
| Csnk1d    | <a href="#">Csnk1d.iSep07</a>  | 2                                                | 0                                            | 0                        | 1                                            | ,1                       |
| Csnk1e    | <a href="#">Csnk1e.dSep07</a>  | 2                                                | 1                                            | ,6                       | 2                                            | ,3,1                     |
| Csnk1e    | <a href="#">Csnk1e.fSep07</a>  | 1                                                | 1                                            | ,2                       | 0                                            | 0                        |
| Csnk1e    | <a href="#">Csnk1e.hSep07</a>  | 1                                                | 1                                            | ,1                       | 0                                            | 0                        |
| Csnk1e    | <a href="#">Csnk1e.eSep07</a>  | 2                                                | 0                                            | 0                        | 1                                            | ,1                       |
| Csnk1g1   | <a href="#">Csnk1g1.aSep07</a> | 2                                                | 1                                            | ,5                       | 1                                            | ,14                      |
| Csnk1g1   | <a href="#">Csnk1g1.bSep07</a> | 2                                                | 1                                            | ,1                       | 1                                            | ,1                       |
| Csnk1g2   | <a href="#">Csnk1g2.eSep07</a> | 1                                                | 1                                            | ,4                       | 1                                            | ,11                      |
| Csnk1g2   | <a href="#">Csnk1g2.fSep07</a> | 1                                                | 1                                            | ,5                       | 0                                            | 0                        |
| Csnk2a2   | <a href="#">Csnk2a2.dSep07</a> | 1                                                | 1                                            | ,6                       | 1                                            | ,6                       |
| Csnk2a2   | <a href="#">Csnk2a2.cSep07</a> | 2                                                | 1                                            | ,1                       | 0                                            | 0                        |
| Csnk2a2   | <a href="#">Csnk2a2.hSep07</a> | 1                                                | 1                                            | ,1                       | 0                                            | 0                        |

|           |                                  |    |   |                       |   |                       |
|-----------|----------------------------------|----|---|-----------------------|---|-----------------------|
| Csnk2b    | <a href="#">Csnk2b.hSep07</a>    | 1  | 1 | ,1                    | 1 | ,6                    |
| Csnk2b    | <a href="#">Csnk2b.dSep07</a>    | 1  | 1 | ,1                    | 0 | 0                     |
| Ctnnb1    | <a href="#">Ctnnb1.dSep07</a>    | 2  | 0 | 0                     | 1 | ,5                    |
| Ctnnb1    | <a href="#">Ctnnb1.bSep07</a>    | 1  | 0 | 0                     | 1 | ,1                    |
| Ctnnb1    | <a href="#">Ctnnb1.jSep07</a>    | 1  | 0 | 0                     | 1 | ,2                    |
| Dkk3      | <a href="#">Dkk3.bSep07</a>      | 1  | 1 | ,1                    | 1 | ,2                    |
| Dkk3      | <a href="#">Dkk3.dSep07</a>      | 1  | 1 | ,1                    | 1 | ,1                    |
| Ep300     | <a href="#">Ep300.aSep07</a>     | 10 | 9 | ,3,2,7,1,48,64,1,1,85 | 8 | ,9,2,13,87,56,1,2,141 |
| Ep300     | <a href="#">Ep300.fSep07</a>     | 1  | 1 | ,5                    | 1 | ,3                    |
| Gnao1     | <a href="#">Gnao1.eSep07</a>     | 1  | 1 | ,3                    | 1 | ,10                   |
| Gnao1     | <a href="#">Gnao1.aSep07</a>     | 1  | 0 | 0                     | 1 | ,1                    |
| Gsk3b     | <a href="#">Gsk3b.bSep07</a>     | 3  | 2 | ,1,1                  | 1 | ,2                    |
| Gsk3b     | <a href="#">Gsk3b.aSep07</a>     | 1  | 1 | ,5                    | 1 | ,11                   |
| Gsk3b     | <a href="#">Gsk3b.dSep07</a>     | 1  | 1 | ,2                    | 1 | ,1                    |
| Kremen1   | <a href="#">Kremen1.aSep07</a>   | 1  | 1 | ,1                    | 1 | ,5                    |
| Kremen1   | <a href="#">Kremen1.bSep07</a>   | 2  | 1 | ,3                    | 0 | 0                     |
| Map3k7    | <a href="#">Map3k7.aSep07</a>    | 1  | 1 | ,14                   | 1 | ,28                   |
| Map3k7    | <a href="#">Map3k7.iSep07</a>    | 1  | 1 | ,1                    | 1 | ,1                    |
| Map3k7ip1 | <a href="#">Map3k7ip1.aSep07</a> | 1  | 1 | ,3                    | 1 | ,9                    |
| Map3k7ip1 | <a href="#">Map3k7ip1.cSep07</a> | 1  | 1 | ,1                    | 0 | 0                     |
| Myc       | <a href="#">Myc.bSep07</a>       | 1  | 1 | ,9                    | 1 | ,23                   |
| Myc       | <a href="#">Myc.cSep07</a>       | 1  | 1 | ,7                    | 1 | ,28                   |
| Myc       | <a href="#">Myc.dSep07</a>       | 1  | 1 | ,1                    | 1 | ,6                    |
| Nlk       | <a href="#">Nlk.aSep07</a>       | 6  | 3 | ,4,17,2               | 4 | ,2,36,5,7             |
| Nlk       | <a href="#">Nlk.cSep07</a>       | 1  | 1 | ,2                    | 1 | ,1                    |
| Ppp2r4    | <a href="#">Ppp2r4.lSep07</a>    | 1  | 0 | 0                     | 1 | ,2                    |
| Ppp2r4    | <a href="#">Ppp2r4.hSep07</a>    | 2  | 0 | 0                     | 1 | ,1                    |
| Ppp2r4    | <a href="#">Ppp2r4.iSep07</a>    | 1  | 0 | 0                     | 1 | ,1                    |
| Ppp2r5c   | <a href="#">Ppp2r5c.eSep07</a>   | 2  | 1 | ,2                    | 1 | ,3                    |
| Ppp2r5c   | <a href="#">Ppp2r5c.aSep07</a>   | 1  | 0 | 0                     | 1 | ,2                    |
| Ppp2r5d   | <a href="#">Ppp2r5d.bSep07</a>   | 1  | 1 | ,8                    | 1 | ,12                   |
| Ppp2r5d   | <a href="#">Ppp2r5d.cSep07</a>   | 1  | 0 | 0                     | 1 | ,5                    |
| Ppp2r5e   | <a href="#">Ppp2r5e.fSep07</a>   | 1  | 1 | ,1                    | 0 | 0                     |
| Rara      | <a href="#">Rara.fSep07</a>      | 1  | 1 | ,7                    | 1 | ,1                    |
| Rara      | <a href="#">Rara.dSep07</a>      | 1  | 1 | ,1                    | 0 | 0                     |
| Rara      | <a href="#">Rara.aSep07</a>      | 2  | 0 | 0                     | 1 | ,1                    |
| Rarg      | <a href="#">Rarg.bSep07</a>      | 1  | 1 | ,10                   | 1 | ,8                    |
| Rarg      | <a href="#">Rarg.dSep07</a>      | 1  | 1 | ,2                    | 0 | 0                     |
| Sox13     | <a href="#">Sox13.bSep07</a>     | 2  | 1 | ,2                    | 1 | ,3                    |
| Sox13     | <a href="#">Sox13.aSep07</a>     | 2  | 1 | ,1                    | 1 | ,1                    |
| Src       | <a href="#">Src.aSep07</a>       | 2  | 2 | ,5,2                  | 2 | ,10,3                 |

|        |                               |   |   |       |   |    |
|--------|-------------------------------|---|---|-------|---|----|
| Src    | <a href="#">Src.hSep07</a>    | 1 | 1 | ,1    | 1 | ,1 |
| Tcf4   | <a href="#">Tcf4.cSep07</a>   | 1 | 1 | ,3    | 1 | ,2 |
| Tcf4   | <a href="#">Tcf4.vgSep07</a>  | 1 | 1 | ,1    | 1 | ,1 |
| Tcf4   | <a href="#">Tcf4.gSep07</a>   | 1 | 1 | ,1    | 0 | 0  |
| Tcf712 | <a href="#">Tcf712.eSep07</a> | 1 | 1 | ,1    | 1 | ,2 |
| Tcf712 | <a href="#">Tcf712.iSep07</a> | 1 | 1 | ,1    | 0 | 0  |
| Tcf712 | <a href="#">Tcf712.aSep07</a> | 1 | 0 | 0     | 1 | ,2 |
| Tcf712 | <a href="#">Tcf712.gSep07</a> | 1 | 0 | 0     | 1 | ,2 |
| Tcf712 | <a href="#">Tcf712.kSep07</a> | 1 | 0 | 0     | 1 | ,1 |
| Tcf712 | <a href="#">Tcf712.nSep07</a> | 1 | 0 | 0     | 1 | ,1 |
| Tgfb2  | <a href="#">Tgfb2.aSep07</a>  | 2 | 2 | ,11,1 | 1 | ,5 |
| Tgfb1  | <a href="#">Tgfb1.bSep07</a>  | 1 | 0 | 0     | 1 | ,5 |
| Tgfb2  | <a href="#">Tgfb2.bSep07</a>  | 1 | 1 | ,4    | 1 | ,1 |
| Tgfbr1 | <a href="#">Tgfbr1.cSep07</a> | 1 | 1 | ,1    | 1 | ,1 |
| Tgfbr1 | <a href="#">Tgfbr1.bSep07</a> | 1 | 0 | 0     | 1 | ,1 |
| Tgfbr2 | <a href="#">Tgfbr2.aSep07</a> | 1 | 1 | ,1    | 0 | 0  |
| Tgfbr2 | <a href="#">Tgfbr2.bSep07</a> | 1 | 0 | 0     | 1 | ,1 |
| Tle1   | <a href="#">Tle1.fSep07</a>   | 1 | 1 | ,3    | 1 | ,1 |
| Tle1   | <a href="#">Tle1.gSep07</a>   | 3 | 1 | ,2    | 0 | 0  |
| Tle3   | <a href="#">Tle3.gSep07</a>   | 1 | 1 | ,1    | 1 | ,1 |
| Tle3   | <a href="#">Tle3.aSep07</a>   | 1 | 0 | 0     | 1 | ,3 |
| Wnt5a  | <a href="#">Wnt5a.bSep07</a>  | 1 | 0 | 0     | 1 | ,3 |
| Wnt5a  | <a href="#">Wnt5a.fSep07</a>  | 1 | 0 | 0     | 1 | ,3 |
| Wnt5b  | <a href="#">Wnt5b.aSep07</a>  | 1 | 1 | ,3    | 1 | ,2 |
| Wnt5b  | <a href="#">Wnt5b.dSep07</a>  | 1 | 0 | 0     | 1 | ,1 |

**Table 14c.** The FGF pathway.

| Gene Name | Ace Name                    | Number of total Diagnostic junctions per variant | Number of Diagnostic junctions present in ES | Counts per Junction - ES | Number of Diagnostic junctions present in EB | Counts per Junction - EB |
|-----------|-----------------------------|--------------------------------------------------|----------------------------------------------|--------------------------|----------------------------------------------|--------------------------|
| Akt2      | <a href="#">Akt2.aSep07</a> | 2                                                | 1                                            | ,1                       | 1                                            | ,1                       |
| Akt2      | <a href="#">Akt2.qSep07</a> | 2                                                | 1                                            | ,1                       | 1                                            | ,1                       |
| Akt3      | <a href="#">Akt3.aSep07</a> | 4                                                | 4                                            | ,2,166,39,26             | 5                                            | ,3,329,65,96,3           |
| Akt3      | <a href="#">Akt3.bSep07</a> | 3                                                | 3                                            | ,1,2,1                   | 2                                            | ,5,15                    |
| Akt3      | <a href="#">Akt3.eSep07</a> | 1                                                | 1                                            | ,1                       | 1                                            | ,3                       |
| Akt3      | <a href="#">Akt3.cSep07</a> | 1                                                | 0                                            | 0                        | 1                                            | ,2                       |

|         |                                |    |    |                            |    |                            |
|---------|--------------------------------|----|----|----------------------------|----|----------------------------|
| Atf2    | <a href="#">Atf2.fSep07</a>    | 1  | 1  | ,2                         | 1  | ,4                         |
| Atf2    | <a href="#">Atf2.qSep07</a>    | 2  | 1  | ,3                         | 1  | ,2                         |
| Creb3   | <a href="#">Creb3.aSep07</a>   | 1  | 1  | ,6                         | 1  | ,5                         |
| Creb3   | <a href="#">Creb3.eSep07</a>   | 1  | 0  | 0                          | 1  | ,2                         |
| Crk     | <a href="#">Crk.eSep07</a>     | 1  | 1  | ,6                         | 1  | ,15                        |
| Crk     | <a href="#">Crk.aSep07</a>     | 1  | 1  | ,16                        | 1  | ,25                        |
| Crk     | <a href="#">Crk.dSep07</a>     | 1  | 1  | ,1                         | 0  | 0                          |
| Fgf1    | <a href="#">Fgf1.bSep07</a>    | 1  | 1  | ,1                         | 0  | 0                          |
| Fgf1    | <a href="#">Fgf1.fSep07</a>    | 1  | 1  | ,2                         | 0  | 0                          |
| Fgf10   | <a href="#">Fgf10.aSep07</a>   | 1  | 1  | ,2                         | 1  | ,43                        |
| Fgf10   | <a href="#">Fgf10.bSep07</a>   | 2  | 0  | 0                          | 1  | ,1                         |
| Fgf13   | <a href="#">Fgf13.iSep07</a>   | 1  | 1  | ,1                         | 0  | 0                          |
| Fgf13   | <a href="#">Fgf13.bSep07</a>   | 1  | 0  | 0                          | 1  | ,3                         |
| Fgf17   | <a href="#">Fgf17.aSep07</a>   | 2  | 1  | ,60                        | 1  | ,11                        |
| Fgf17   | <a href="#">Fgf17.bSep07</a>   | 1  | 1  | ,14                        | 0  | 0                          |
| Fgf5    | <a href="#">Fgf5.aSep07</a>    | 1  | 0  | 0                          | 2  | ,4,21                      |
| Fgf5    | <a href="#">Fgf5.bSep07</a>    | 1  | 0  | 0                          | 1  | ,6                         |
| Fgfr1   | <a href="#">Fgfr1.jSep07</a>   | 1  | 1  | ,4                         | 1  | ,34                        |
| Fgfr1   | <a href="#">Fgfr1.fSep07</a>   | 1  | 0  | 0                          | 1  | ,2                         |
| Gab1    | <a href="#">Gab1.aSep07</a>    | 2  | 1  | ,6                         | 2  | ,2,1                       |
| Gab1    | <a href="#">Gab1.bSep07</a>    | 1  | 1  | ,84                        | 1  | ,14                        |
| Grb2    | <a href="#">Grb2.bSep07</a>    | 1  | 1  | ,252                       | 1  | ,98                        |
| Grb2    | <a href="#">Grb2.dSep07</a>    | 1  | 1  | ,5                         | 1  | ,1                         |
| Hras1   | <a href="#">Hras1.eSep07</a>   | 2  | 2  | ,1,1                       | 1  | ,1                         |
| Hras1   | <a href="#">Hras1.dSep07</a>   | 2  | 1  | ,3                         | 1  | ,3                         |
| Itpr1   | <a href="#">Itpr1.aSep07</a>   | 14 | 12 | ,1,10,5,27,1,3,9,7,6,5,2,1 | 11 | ,16,6,77,5,14,3,18,3,7,7,6 |
| Itpr1   | <a href="#">Itpr1.dSep07</a>   | 1  | 1  | ,15                        | 1  | ,19                        |
| Itpr1   | <a href="#">Itpr1.iSep07</a>   | 1  | 1  | ,1                         | 1  | ,2                         |
| Itpr1   | <a href="#">Itpr1.eSep07</a>   | 1  | 1  | ,3                         | 0  | 0                          |
| Itpr1   | <a href="#">Itpr1.gSep07</a>   | 1  | 0  | 0                          | 1  | ,1                         |
| Map3k1  | <a href="#">Map3k1.aSep07</a>  | 12 | 11 | ,2,5,2,3,1,2,1,4,16,2,8    | 11 | ,5,10,2,2,1,3,3,4,29,4,9   |
| Map3k1  | <a href="#">Map3k1.bSep07</a>  | 0  | 0  | 0                          | 1  | ,1                         |
| Mapk1   | <a href="#">Mapk1.dSep07</a>   | 1  | 1  | ,2                         | 1  | ,2                         |
| Mapk1   | <a href="#">Mapk1.aSep07</a>   | 1  | 1  | ,1                         | 1  | ,5                         |
| Mapk14  | <a href="#">Mapk14.bSep07</a>  | 1  | 2  | ,1,1                       | 1  | ,2                         |
| Mapk14  | <a href="#">Mapk14.cSep07</a>  | 1  | 1  | ,1                         | 1  | ,1                         |
| Pik3c2a | <a href="#">Pik3c2a.aSep07</a> | 3  | 3  | ,14,8,5                    | 3  | ,21,6,12                   |
| Pik3c2a | <a href="#">Pik3c2a.bSep07</a> | 1  | 1  | ,3                         | 2  | ,3,2                       |
| Pik3c2a | <a href="#">Pik3c2a.eSep07</a> | 1  | 1  | ,6                         | 1  | ,3                         |

|        |                               |   |   |            |   |                   |
|--------|-------------------------------|---|---|------------|---|-------------------|
| Pik3r1 | <a href="#">Pik3r1.aSep07</a> | 9 | 5 | ,1,1,3,4,4 | 8 | ,2,9,1,14,8,3,6,5 |
| Pik3r1 | <a href="#">Pik3r1.bSep07</a> | 1 | 0 | 0          | 1 | ,14               |
| Pik3r3 | <a href="#">Pik3r3.aSep07</a> | 1 | 1 | ,1         | 1 | ,3                |
| Pik3r3 | <a href="#">Pik3r3.cSep07</a> | 1 | 0 | 0          | 1 | ,1                |
| Raf1   | <a href="#">Raf1.aSep07</a>   | 1 | 1 | ,5         | 1 | ,5                |
| Raf1   | <a href="#">Raf1.jSep07</a>   | 1 | 0 | 0          | 1 | ,1                |
| Stat3  | <a href="#">Stat3.bSep07</a>  | 1 | 1 | ,3         | 1 | ,4                |
| Stat3  | <a href="#">Stat3.cSep07</a>  | 1 | 0 | 0          | 1 | ,1                |

**Table 14d.** The Mouse Regulatory network.

| Gene Name     | Ace Name                             | Number of total Diagnostic junctions per variant | Number of Diagnostic junctions present in ES | Counts per Junction - ES                                         | Number of Diagnostic junctions present in EB | Counts per Junction - EB                                   |
|---------------|--------------------------------------|--------------------------------------------------|----------------------------------------------|------------------------------------------------------------------|----------------------------------------------|------------------------------------------------------------|
| Ahctf1        | <a href="#">Ahctf1.aSep07</a>        | 25                                               | 24                                           | ,88,2,7,8,1,20,25,113,15,10,9,2,17,15,16,3,8,2,116,15,17,117,9,9 | 22                                           | ,63,1,1,14,15,24,25,6,5,9,3,18,19,23,11,2,75,13,12,51,8,12 |
| Ahctf1        | <a href="#">Ahctf1.fSep07</a>        | 1                                                | 1                                            | ,6                                                               | 1                                            | ,11                                                        |
| Ahctf1        | <a href="#">Ahctf1.dSep07</a>        | 1                                                | 1                                            | ,1                                                               | 0                                            | 0                                                          |
| Ahctf1        | <a href="#">Ahctf1.hSep07</a>        | 2                                                | 0                                            | 0                                                                | 1                                            | ,1                                                         |
| Arid3a        | <a href="#">Arid3a.bSep07</a>        | 1                                                | 1                                            | ,12                                                              | 1                                            | ,33                                                        |
| Arid3a        | <a href="#">Arid3a.dSep07</a>        | 1                                                | 1                                            | ,2                                                               | 1                                            | ,1                                                         |
| Arid3a        | <a href="#">Arid3a.cSep07</a>        | 1                                                | 0                                            | 0                                                                | 1                                            | ,1                                                         |
| Arid3bandClk3 | <a href="#">Arid3bandClk3.kSep07</a> | 2                                                | 2                                            | ,1,1                                                             | 2                                            | ,1,3                                                       |
| Arid3bandClk3 | <a href="#">Arid3bandClk3.cSep07</a> | 1                                                | 1                                            | ,4                                                               | 1                                            | ,16                                                        |
| Arid3bandClk3 | <a href="#">Arid3bandClk3.sSep07</a> | 2                                                | 0                                            | 0                                                                | 2                                            | ,2,2                                                       |
| Arid3bandClk3 | <a href="#">Arid3bandClk3.gSep07</a> | 0                                                | 0                                            | 0                                                                | 1                                            | ,1                                                         |
| Arid3bandClk3 | <a href="#">Arid3bandClk3.mSep07</a> | 1                                                | 0                                            | 0                                                                | 1                                            | ,2                                                         |
| Btbd14a       | <a href="#">Btbd14a.dSep07</a>       | 4                                                | 0                                            | 0                                                                | 1                                            | ,1                                                         |
| Btbd14b       | <a href="#">Btbd14b.bSep07</a>       | 2                                                | 1                                            | ,1                                                               | 0                                            | 0                                                          |
| Btbd14b       | <a href="#">Btbd14b.dSep07</a>       | 1                                                | 1                                            | ,1                                                               | 0                                            | 0                                                          |
| Cdc2a         | <a href="#">Cdc2a.aSep07</a>         | 1                                                | 1                                            | ,114                                                             | 1                                            | ,281                                                       |
| Cdc2a         | <a href="#">Cdc2a.bSep07</a>         | 1                                                | 1                                            | ,1                                                               | 1                                            | ,8                                                         |
| Dpf2          | <a href="#">Dpf2.aSep07</a>          | 2                                                | 2                                            | ,13,7                                                            | 2                                            | ,29,15                                                     |
| Gatad2b       | <a href="#">Gatad2b.dSep07</a>       | 1                                                | 1                                            | ,16                                                              | 1                                            | ,30                                                        |
| Gatad2b       | <a href="#">Gatad2b.aSep07</a>       | 1                                                | 1                                            | ,2                                                               | 0                                            | 0                                                          |
| Hdac2         | <a href="#">Hdac2.aSep07</a>         | 1                                                | 1                                            | ,9                                                               | 1                                            | ,34                                                        |
| Hdac2         | <a href="#">Hdac2.eSep07</a>         | 2                                                | 1                                            | ,3                                                               | 1                                            | ,6                                                         |
| Hdac2         | <a href="#">Hdac2.cSep07</a>         | 1                                                | 0                                            | 0                                                                | 1                                            | ,1                                                         |

|                      |                                             |   |   |                    |   |                  |
|----------------------|---------------------------------------------|---|---|--------------------|---|------------------|
| ItgalandPelo         | <a href="#">ItgalandPelo.aSep07</a>         | 8 | 3 | ,1,1,2             | 7 | ,2,2,1,4,5,1,2   |
| ItgalandPelo         | <a href="#">ItgalandPelo.lSep07</a>         | 0 | 1 | ,1                 | 0 | 0                |
| ItgalandPelo         | <a href="#">ItgalandPelo.cSep07</a>         | 2 | 0 | 0                  | 1 | ,2               |
| ItgalandPelo         | <a href="#">ItgalandPelo.iSep07</a>         | 2 | 0 | 0                  | 1 | ,1               |
| Mybbp1a              | <a href="#">Mybbp1a.dSep07</a>              | 1 | 1 | ,1                 | 0 | 0                |
| Nanog                | <a href="#">Nanog.aSep07</a>                | 1 | 1 | ,77                | 1 | ,53              |
| Nanog                | <a href="#">Nanog.cSep07</a>                | 1 | 1 | ,1                 | 0 | 0                |
| Nr0b1                | <a href="#">Nr0b1.aSep07</a>                | 1 | 1 | ,1                 | 0 | 0                |
| Pou5f1               | <a href="#">Pou5f1.aSep07</a>               | 4 | 4 | ,486,367,1699,1300 | 4 | ,207,173,687,909 |
| Rai14                | <a href="#">Rai14.cSep07</a>                | 2 | 2 | ,9,1               | 1 | ,4               |
| Rai14                | <a href="#">Rai14.fSep07</a>                | 1 | 0 | 0                  | 1 | ,2               |
| Rai14                | <a href="#">Rai14.hSep07</a>                | 1 | 0 | 0                  | 1 | ,1               |
| Rif1                 | <a href="#">Rif1.bSep07</a>                 | 1 | 1 | ,72                | 1 | ,10              |
| Rif1                 | <a href="#">Rif1.iSep07</a>                 | 2 | 1 | ,1                 | 0 | 0                |
| Rif1                 | <a href="#">Rif1.eSep07</a>                 | 1 | 1 | ,1                 | 0 | 0                |
| Rif1                 | <a href="#">Rif1.nSep07</a>                 | 1 | 0 | 0                  | 1 | ,1               |
| Rnf2and1200016B10Rik | <a href="#">Rnf2and1200016B10Rik.eSep07</a> | 2 | 2 | ,1,13              | 1 | ,6               |
| Rnf2and1200016B10Rik | <a href="#">Rnf2and1200016B10Rik.dSep07</a> | 1 | 1 | ,4                 | 1 | ,15              |
| Rnf2and1200016B10Rik | <a href="#">Rnf2and1200016B10Rik.hSep07</a> | 1 | 1 | ,1                 | 0 | 0                |
| Rnf2and1200016B10Rik | <a href="#">Rnf2and1200016B10Rik.nSep07</a> | 1 | 1 | ,3                 | 0 | 0                |
| Rnf2and1200016B10Rik | <a href="#">Rnf2and1200016B10Rik.aSep07</a> | 1 | 0 | 0                  | 1 | ,5               |
| Rybp                 | <a href="#">Rybp.aSep07</a>                 | 2 | 1 | ,18                | 1 | ,20              |
| Sall1                | <a href="#">Sall1.aSep07</a>                | 1 | 1 | ,6                 | 2 | ,6,1             |
| Sall1                | <a href="#">Sall1.cSep07</a>                | 0 | 0 | 0                  | 1 | ,1               |
| Sall4                | <a href="#">Sall4.cSep07</a>                | 2 | 1 | ,1                 | 2 | ,1,1             |
| Sall4                | <a href="#">Sall4.aSep07</a>                | 1 | 1 | ,16                | 1 | ,14              |
| Sall4                | <a href="#">Sall4.bSep07</a>                | 1 | 0 | 0                  | 1 | ,2               |
| Sall4                | <a href="#">Sall4.eSep07</a>                | 1 | 0 | 0                  | 1 | ,1               |
| Smarcad1             | <a href="#">Smarcad1.eSep07</a>             | 3 | 1 | ,2                 | 2 | ,3,1             |
| Smarcad1             | <a href="#">Smarcad1.lSep07</a>             | 1 | 1 | ,2                 | 1 | ,20              |
| Smarcad1             | <a href="#">Smarcad1.nSep07</a>             | 1 | 0 | 0                  | 1 | ,8               |
| Smarcad1             | <a href="#">Smarcad1.mSep07</a>             | 2 | 0 | 0                  | 1 | ,1               |
| Smarcc1              | <a href="#">Smarcc1.aSep07</a>              | 1 | 1 | ,6                 | 1 | ,8               |
| Smarcc1              | <a href="#">Smarcc1.fSep07</a>              | 1 | 1 | ,1                 | 0 | 0                |
| Smarcc1              | <a href="#">Smarcc1.hSep07</a>              | 1 | 1 | ,1                 | 0 | 0                |
| Smarcc1              | <a href="#">Smarcc1.iSep07</a>              | 1 | 0 | 0                  | 1 | ,1               |
| Trim28               | <a href="#">Trim28.aSep07</a>               | 1 | 1 | ,54                | 1 | ,65              |
| Wapal                | <a href="#">Wapal.aSep07</a>                | 3 | 3 | ,21,31,11          | 3 | ,19,37,24        |
| Wapal                | <a href="#">Wapal.cSep07</a>                | 2 | 1 | ,35                | 1 | ,30              |
| Wapal                | <a href="#">Wapal.bSep07</a>                | 1 | 1 | ,4                 | 0 | 0                |



|        |                               |   |   |                  |   |                   |
|--------|-------------------------------|---|---|------------------|---|-------------------|
| Wapal  | <a href="#">Wapal.eSep07</a>  | 1 | 1 | ,1               | 0 | 0                 |
| Wdr18  | <a href="#">Wdr18.aSep07</a>  | 2 | 2 | ,75,34           | 2 | ,159,66           |
| Yy1    | <a href="#">Yy1.aSep07</a>    | 1 | 1 | ,31              | 1 | ,48               |
| Zfp219 | <a href="#">Zfp219.eSep07</a> | 1 | 1 | ,1               | 1 | ,2                |
| Zfp219 | <a href="#">Zfp219.aSep07</a> | 1 | 1 | ,1               | 1 | ,4                |
| Zfp219 | <a href="#">Zfp219.dSep07</a> | 1 | 1 | ,2               | 1 | ,1                |
| Zfp219 | <a href="#">Zfp219.cSep07</a> | 1 | 1 | ,1               | 0 | 0                 |
| Zfp219 | <a href="#">Zfp219.kSep07</a> | 1 | 0 | 0                | 1 | ,1                |
| Zfp281 | <a href="#">Zfp281.bSep07</a> | 1 | 1 | ,1               | 0 | 0                 |
| Zfp281 | <a href="#">Zfp281.aSep07</a> | 0 | 0 | 0                | 1 | ,1                |
| Zfp42  | <a href="#">Zfp42.eSep07</a>  | 3 | 2 | ,73,3            | 1 | ,2                |
| Zfp42  | <a href="#">Zfp42.gSep07</a>  | 2 | 1 | ,101             | 1 | ,2                |
| Zfp609 | <a href="#">Zfp609.aSep07</a> | 4 | 2 | ,12,1            | 3 | ,14,1,7           |
| Zmym2  | <a href="#">Zmym2.aSep07</a>  | 6 | 6 | ,3,60,6,14,23,12 | 6 | ,5,51,14,27,63,26 |
| Zmym2  | <a href="#">Zmym2.eSep07</a>  | 1 | 1 | ,2               | 1 | ,4                |
| Zmym2  | <a href="#">Zmym2.iSep07</a>  | 2 | 1 | ,1               | 1 | ,1                |

**Supplementary Table 15.** Quantitative RT-PCR results. (a) Tabulated results of quantitative real-time PCR results presented in Figure 3. (b) Isoform specific identification by SQRL and semi-quantitative real-time PCR. Primers were designed to amplify a set of transcripts from loci containing multiple isoforms as identified by SQRL, where one of the primers spans the diagnostic junction. ES and EB counts are the number of tags assigned to the specific junction. Real time is the average cycle number (n=4) of real time PCR with Forward and Reverse primers. ND is not detected.

**Table 15a.**

| <b>Genbank</b> | <b>Common Name</b> | <b>ES cycle number</b> | <b>ES SOLiD tags</b> | <b>EB cycle number</b> | <b>EB SOLiD tags</b> |
|----------------|--------------------|------------------------|----------------------|------------------------|----------------------|
| NM_011949      | Mapk1              | 22.13764               | 5310.254             | 21.63845               | 7347.606             |
| NM_010937      | Nras               | 22.96125               | 2642.121             | 22.81491               | 5019.941             |
| NM_008228      | Hdac1              | 22.57395               | 845.4121             | 22.3401                | 1174.684             |
| NM_001079908   | Fgfr1              | 23.2706                | 2451.191             | 21.69304               | 4816.217             |
| NM_175168      | Ptk7               | 23.64395               | 2357.776             | 22.48915               | 5463.843             |
| NM_001079908   | Fgfr1              | 23.67074               | 2451.191             | 22.22619               | 4816.217             |
| NM_001079908   | Fgfr1              | 23.68026               | 2451.191             | 21.68276               | 4816.217             |
| NM_008927      | Map2k1             | 23.71356               | 3476.775             | 21.90571               | 4294.512             |
| NM_011952      | Mapk3              | 23.91087               | 3287.23              | 22.59715               | 7637.099             |
| NM_001025432   | Crebbp             | 23.51923               | 1055.223             | 22.97768               | 1990.331             |
| NM_175168      | Ptk7               | 23.73324               | 2357.776             | 21.69664               | 5463.843             |
| NM_009231      | Sos1               | 23.98299               | 638.078              | 26.23452               | 392.2004             |
| NM_023138      | Map2k2             | 24.42755               | 2578.704             | 23.34689               | 4415.79              |
| NM_029780      | Raf1               | 24.53259               | 2620.086             | 23.97024               | 3899.741             |
| NM_001042607   | Ryk                | 24.67893               | 2965.917             | 23.49197               | 3556.81              |

|              |          |          |          |          |          |
|--------------|----------|----------|----------|----------|----------|
| NM_021501    | Pias4    | 24.22248 | 1311.983 | 24.10765 | 1335.394 |
| NM_009101    | Rras     | 24.41513 | 2630.336 | 22.52206 | 4044.436 |
| NM_016961    | Mapk9    | 24.63528 | 2106.987 | 24.03271 | 1697.658 |
| NM_172688    | Map3k7   | 24.69545 | 1152.507 | 24.17391 | 1710.166 |
| NM_009758    | Bmpr1a   | 25.02532 | 1200.138 | 23.58968 | 2285.31  |
| NM_019392    | Tyro3    | 25.04825 | 665.6785 | 23.43235 | 1444.645 |
| NM_007397    | Acvr2b   | 25.17729 | 375.8531 | 24.1661  | 570.5452 |
| NM_008284    | Hras1    | 25.62532 | 4194.521 | 24.86961 | 7027.144 |
| NM_025481    | Smurf2   | 25.20405 | 692.5019 | 24.2972  | 832.7369 |
| NM_009758    | Bmpr1a   | 25.8889  | 1200.138 | 25.49339 | 2285.31  |
| NM_001038627 | Smurf1   | 25.58711 | 1024.889 | 24.90417 | 1180.154 |
| NM_011577    | Tgfb1    | 25.64276 | 177.3725 | 22.55482 | 1378.419 |
| NM_007561    | Bmpr2    | 25.65387 | 1084.54  | 24.53502 | 1249.418 |
| NM_021284    | Kras     | 25.73224 | 1887.186 | 24.99845 | 2171.217 |
| NM_007584    | Ddr1     | 26.22968 | 1000.135 | 27.96704 | 994.373  |
| NM_025846    | Rras2    | 26.29756 | 2632.496 | 25.06322 | 4166.659 |
| NM_009370    | Tgfbr1   | 26.49044 | 673.4312 | 24.50842 | 1205.12  |
| NM_008541    | Smad5    | 26.69509 | 563.1713 | 25.58061 | 1053.789 |
| NM_009370    | Tgfbr1   | 26.88518 | 673.4312 | 26.02576 | 1205.12  |
| NM_010207    | Fgfr2    | 27.10811 | 71.84449 | 25.40933 | 364.5034 |
| NM_001110204 | Acvr1    | 27.27563 | 120.6195 | 25.7714  | 308.8941 |
| NM_009465    | Axl      | 27.30406 | 783.9535 | 28.53082 | 215.0044 |
| NM_016769    | Smad3    | 27.3512  | 100.0847 | 25.10473 | 199.7649 |
| NM_008587    | Mertk    | 27.79649 | 59.37528 | 28.56632 | 37.44862 |
| NM_007396    | Acvr2a   | 27.41199 | 421.5695 | 25.80305 | 1033.823 |
| NM_008871    | Serpine1 | 27.56447 | 3207.413 | 27.74486 | 241.2575 |
| NM_007395    | Acvr1b   | 27.5534  | 541.3111 | 26.43666 | 1267.634 |
| NM_007557    | Bmp7     | 27.57368 | 355.1296 | 24.18815 | 2050.13  |

|           |           |          |          |          |          |
|-----------|-----------|----------|----------|----------|----------|
| NM_009465 | Axl       | 27.83104 | 783.9535 | 26.81194 | 215.0044 |
| NM_008624 | Mras      | 27.90132 | 796.8422 | 29.1894  | 180.883  |
| NM_008011 | Fgfr4     | 27.91065 | 57.41736 | 25.901   | 63.16913 |
| NM_013690 | Tek       | 27.9951  | 250.7572 | 30.51207 | 218.0649 |
| NM_009371 | Tgfbr2    | 28.09224 | 88.9194  | 28.64944 | 106.278  |
| NM_007560 | Bmpr1b    | 28.72691 | 59.7167  | 29.82869 | 40.49754 |
| NM_009368 | Tgfb3     | 28.79632 | 69.84049 | 29.4501  | 27.49605 |
| NM_008279 | Map4k1    | 28.5731  | 252.7605 | 27.92812 | 180.2125 |
| NM_008380 | Inhba     | 29.36635 | 139.3778 | 31.68163 | 61.83224 |
| NM_013846 | Ror2      | 28.94738 | 415.6349 | 27.32325 | 782.9453 |
| NM_013845 | Ror1      | 28.99812 | 55.58212 | 26.61767 | 203.7274 |
| NM_025609 | Map3k7ip1 | 29.01361 | 373.8021 | 27.86141 | 850.8656 |
| NM_008261 | Hnf4a     | 29.34712 | 48.43486 | 28.06075 | 111.1253 |
| NM_008809 | Pdgfrb    | 29.02357 | 330.789  | 27.10651 | 1949.803 |
| NM_010234 | Fos       | 29.41763 | 168.7299 | 27.73115 | 328.1763 |
| NM_008542 | Smad6     | 29.61984 | 120.8769 | 25.57063 | 1316.565 |
| NM_207655 | Egfr      | 29.74992 | 496.7688 | 27.92828 | 106.0937 |
| NM_144547 | Amhr2     | 29.93275 | 120.592  | 28.28257 | 330.6112 |
| NM_011098 | Pitx2     | 30.14793 | 470.5871 | 27.75162 | 1418.153 |
| NM_010565 | Inhbc     | 30.76214 | 46.94626 | 32.40724 | 10.3788  |
| NM_203345 | Ltk       | 30.61591 | 58.64773 | 30.07558 | 43.85042 |
| NM_008010 | Fgfr3     | 30.35706 | 43.34709 | 27.59249 | 364.4558 |
| NM_009371 | Tgfbr2    | 30.5693  | 88.9194  | 28.11753 | 106.278  |
| NM_019732 | Runx3     | 31.0753  | 40.68603 | 30.57396 | 56.52883 |
| NM_011058 | Pdgfra    | 30.83449 | 26.9458  | 25.4203  | 252.3289 |
| NM_022563 | Ddr2      | 31.54436 | 50.43414 | 36.1391  | 16.75731 |
| NM_011587 | Tie1      | 31.39734 | 31.39377 | 29.13842 | 57.20111 |
| NM_009504 | Vdr       | 32.03512 | 29.3673  | 33.36767 | 20.82744 |

|           |        |          |          |          |          |
|-----------|--------|----------|----------|----------|----------|
| NM_008700 | Nkx2-5 | 32.1891  | 17.31292 | 31.6074  | 24.05443 |
| NM_009367 | Tgfb2  | 31.90848 | 678.9178 | 29.60443 | 1272.238 |
| NM_011058 | Pdgfra | 32.12296 | 26.9458  | 26.15645 | 252.3289 |
| NM_009820 | Runx2  | 34.52617 | 35.12999 | 32.47466 | 21.54571 |
| NM_007439 | Alk    | 34.606   | 18.86252 | 31.8986  | 23.79985 |
| NM_008380 | Inhba  | 34.90037 | 139.3778 | 35.44247 | 61.83224 |

**Table 15b.**

| Transcript | Aceview        | Genomic coordinates       | ES                | EB                | RT ES<br>(cycle) | RT EB<br>(cycle) | No RT<br>(cycle) |
|------------|----------------|---------------------------|-------------------|-------------------|------------------|------------------|------------------|
|            |                |                           | junction<br>count | junction<br>count |                  |                  |                  |
| Akt3       | Akt3.aSep07    | chr1_179033236_179039757  | 166               | 329               | 27.00703         | 25.90487         | 34.6682          |
| Akt3       | Akt3.bSep07    | chr1_179039608_179039757  | 2                 | 15                | 32.51142         | 31.60121         | 34.4815          |
| Akt3       | Akt3.bSep07    | chr1_179033236_179039549  | 1                 | 5                 | 30.90337         | 30.29073         | ND               |
| Axin1      | Axin1.bSep07   | chr17_26327175_26330883   | 24                | 40                | 26.77519         | 27.60964         | ND               |
| Axin1      | Axin1.aSep07   | chr17_26329567_26330883   | 14                | 17                | 28.83183         | 29.51696         | 31.119           |
| Axin1      | Axin1.aSep07   | chr17_26327175_26329460   | 1                 | 2                 | 28.00483         | 29.00448         | ND               |
| Axin2      | Axin2.aSep07   | chr11_108781874_108784465 | 7                 | 3                 | ND               | ND               | ND               |
| Axin2      | Axin2.bSep07   | chr11_108782506_108784465 | 2                 | 15                | 29.08967         | 27.23876         | 29.7396          |
| Crebbp     | Crebbp.aSep07  | chr16_4101637_4107427     | 1                 | 3                 | 25.84427         | 25.61635         | 27.7254          |
| Crebbp     | Crebbp.bSep07  | chr16_4101667_4107427     | 0                 | 6                 | 28.11053         | 28.03597         | ND               |
| Csnk1a1    | Csnk1a1.aSep07 | chr18_61729215_61731527   | 51                | 53                | 24.86645         | 25.42199         | ND               |

|         |                |                          |     |    |          |          |         |
|---------|----------------|--------------------------|-----|----|----------|----------|---------|
| Csnk1a1 | Csnk1a1.bSep07 | chr18_61740140_61747079  | 36  | 98 | 24.72105 | 25.42184 | ND      |
| Csnk1a1 | Csnk1a1.dSep07 | chr18_61740104_61747079  | 19  | 40 | 23.94017 | ND       | ND      |
| Csnk1a1 | Csnk1a1.kSep07 | chr18_61744057_61744818  | 16  | 13 | 28.10126 | 29.03959 | 32.0394 |
| Csnk1a1 | Csnk1a1.aSep07 | chr18_61740104_61741689  | 12  | 22 | 34.23382 | 34.63918 | ND      |
| Csnk1a1 | Csnk1a1.bSep07 | chr18_61729215_61735063  | 4   | 2  | 23.60193 | 24.2035  | 26.6826 |
| Csnk1g1 | Csnk1g1.cSep07 | chr9_65756974_65768810   | 5   | 0  | 28.07337 | 27.7596  | 34.3804 |
| Csnk1g1 | Csnk1g1.aSep07 | chr9_65756974_65797822   | 2   | 1  | 29.01295 | 29.23306 | ND      |
| Mark2   | Mark2.aSep07   | chr19_7352575_7355487    | 8   | 22 | 33.13691 | 33.66124 | 35.1829 |
| Mark2   | Mark2.eSep07   | chr19_7352575_7353600    | 3   | 10 | 31.14151 | 32.06858 | ND      |
| Mark2   | Mark2.cSep07   | chr19_7352575_7354475    | 0   | 4  | 35.61735 | 36.99471 | ND      |
| Myc     | Myc.bSep07     | chr15_61817505_61819061  | 9   | 23 | 27.20391 | 25.83068 | 37.4391 |
| Myc     | Myc.cSep07     | chr15_61817505_61819064  | 7   | 28 | 27.87136 | 26.91339 | 34.3312 |
| Myc     | Myc.dSep07     | chr15_61818857_61819061  | 1   | 6  | 34.12246 | 33.06245 | ND      |
| Pik3c2a | Pik3c2a.bSep07 | chr7_123586191_123586817 | 3   | 2  | ND       | ND       | ND      |
| Pik3c2a | Pik3c2a.bSep07 | chr7_123562094_123586104 | 0   | 3  | 27.83701 | 27.87773 | ND      |
| Pik3c2a | Pik3c2a.aSep07 | chr7_123562094_123586817 | 24  | 8  | 25.9582  | 26.50988 | ND      |
| Ppp2r4  | Ppp2r4.aSep07  | chr2_30295283_30298809   | 6   | 15 | 23.24776 | 25.16518 | ND      |
| Ppp2r4  | Ppp2r4.eSep07  | chr2_30298916_30301896   | 5   | 5  | 24.27214 | 25.09736 | ND      |
| Ppp2r4  | Ppp2r4.hSep07  | chr2_30297497_30298809   | 0   | 1  | 36.36248 | 36.04673 | ND      |
| Ppp2r4  | Ppp2r4.lSep07  | chr2_30298525_30298809   | 0   | 2  | ND       | ND       | ND      |
| Ppp2r5d | Ppp2r5d.aSep07 | chr17_46821325_46821454  | 15  | 44 | 24.85686 | 25.30659 | ND      |
| Tgfb2   | Tgfb2.aSep07   | chr1_188473776_188514599 | 11  | 5  | 34.19441 | 33.19714 | ND      |
| Tgfb2   | Tgfb2.bSep07   | chr1_188473776_188528307 | 4   | 1  | 28.34279 | 26.32685 | ND      |
| Zfp42   | Zfp42.bSep07   | chr8_44389912_44392194   | 561 | 14 | 21.09935 | 27.54184 | 32.9746 |
| Zfp42   | Zfp42.eSep07   | chr8_44389912_44391033   | 73  | 2  | 26.87531 | 31.76694 | ND      |
| Zfp42   | Zfp42.eSep07   | chr8_44391295_44392194   | 3   | 0  | 28.03289 | 33.80009 | ND      |

---

**Supplementary Table 16.** Primers used for experimental validation in this study, including quantitative real-time PCR, semi-quantitative real-time PCR, and amplification of genomic DNA for SNP validation.

| Reference ID | Gene Name | Forward                  | Reverse                  |
|--------------|-----------|--------------------------|--------------------------|
| 6519         | Mapk1     | ACATGAGAACATCATTTGGCATCA | AAAGGTCCGTCTCCATGAGGT    |
| 11499        | Nras      | AAGTCCAAAAGCCTCCCGAG     | CAACACCACCTGCTCCAACC     |
| 12641        | Hdac1     | TCGCTGCTGGACTTACGAAA     | GCTTGAAATCCGGTCCAAAG     |
| 17205        | Fgfr1     | CATCGGGCTGGATAAGGACA     | CCGAGATCAGATCCGACAGG     |
| 7680         | Ptk7      | CACCCAAGCCCACTGTGATC     | CACACTATTGATGCGCAAGGTC   |
| 17205        | Fgfr1     | CATCGGGCTGGATAAGGACA     | CCGAGATCAGATCCGACAGG     |
| 17205        | Fgfr1     | CATCGGGCTGGATAAGGACA     | CCGAGATCAGATCCGACAGG     |
| 18606        | Map2k1    | GTGCAACTCCCCGTACATCG     | CTTGATCCAAGGACCCACCA     |
| 16742        | Mapk3     | ACAGTAGAGGAAGCGCTGGC     | TCCAGCTCCATGTGCAAGGT     |
| 6423         | Crebbp    | CTGGCAGACCTCGGAAAAGAA    | CTGGCGCCGCAAAAACT        |
| 7680         | Ptk7      | CACCCAAGCCCACTGTGATC     | CACACTATTGATGCGCAAGGTC   |
| 7894         | Sos1      | GCACCCTAAGCCTCTTCCG      | GGATGTCTCATGGTTCTTGGTC   |
| 21931        | Map2k2    | GCCTACCTCCGAGAGAAGCA     | ACCCCGAAGTCACACAGCTTA    |
| 14924        | Raf1      | TACTCGTACGGCATCGTGCT     | TACCCACGGCCTACCATGAA     |
| 18840        | Ryk       | AGCTTCGAGGTCTGCACCAC     | CCCCAATTCATGTATGGCA      |
| 21932        | Pias4     | CCAATACCCACCCAACATCG     | AGGGCCTCTTAGGTTCCACAC    |
| 15960        | Rras      | GTCGATGAGGCATTTGAGCA     | CCTCCATCCTTCTTCTGGG      |
| 2325         | Mapk9     | CTCTGGAGCCCAAGGAATTGT    | CGTGGGTTTGGTTCTGAAAA     |
| 11916        | Map3k7    | GTGATAACACGCCGAAACC      | AAATTTTTGATCAGTGGTGGTCCG |
| 5153         | Bmpr1a    | TCATTGAAAGACCTGATTGACCA  | CGAACCATCTGAATCTGTTTGG   |
| 10199        | Tyro3     | GAGTTTGGATCAGTGCGGGA     | TCGCTTGAGGCAATGATGTC     |
| 19055        | Acvr2b    | AGTTCATTGCTGCCGAGAAAC    | CCCCTTGAGGTAATCCGTGA     |

|       |          |                         |                              |
|-------|----------|-------------------------|------------------------------|
| 16944 | Hras1    | GCAGCTATGGCATCCCCTAC    | CAATTTATGCTGCCGAATCTCA       |
| 3380  | Smurf2   | ACTCCTCCAGACCTACCGGAA   | GGATCATGC CATGTGCTCAC        |
| 5153  | Bmpr1a   | TCATTGAAAGACCTGATTGACCA | CGAACCATCTGAATCTGTTTGG       |
| 14141 | Smurf1   | CTTGCTGAAGCCCTTTGACC    | AGTGTTTCAGCCGGGTGTTG         |
| 15648 | Tgfb1    | GCCTGAGTGGCTGTCTTTTGA   | CACAAGAGCAGTGAGCGCTG         |
| 258   | Bmpr2    | ACTTTCACCCCCTGACACA     | AACAGCTAACACAGAACTGATGCC     |
| 15259 | Kras     | AGCGCCTTGACGATACAGCT    | GTTTCTCCATCAATTACTACTTGTTCCT |
| 7521  | Ddr1     | CTGGAGAACAAGGCCACTCAG   | GCGATCTGGGCCCCC              |
| 16629 | Rras2    | TGTGTGATCGATGACCGAGC    | CCCTCGCTGTCTCATGTA           |
| 12079 | Tgfbr1   | TTTCAGAGGGCACCACCTTAA   | GGTCCTGGCAATTGTTCTTTG        |
| 4629  | Smad5    | AGTCAACCATGGATTTCGAGGC  | CGTCCTGTCCGGTGGTACTCTG       |
| 12079 | Tgfbr1   | TTTCAGAGGGCACCACCTTAA   | GGTCCTGGCAATTGTTCTTTG        |
| 16824 | Fgfr2    | TTTAAGCTGCTCAAAGAGGGACA | TGTGAGGGTACAGCATGCCA         |
| 22121 | Acvr1    | CTCCGGTCTTCCTTTCTCTGG   | AGCTGCCCCCTCCATACTTCTC       |
| 15652 | Axl      | TGTTTCCTTGTCATCGGAGG    | CTTTCGGACACGGTACCTGAC        |
| 18601 | Smad3    | CATCACCACGCAGAACGTG     | AGATAACGTGAGGGAGCCCC         |
| 10314 | Mertk    | CCGTGTTAATGAAAAACCGGA   | GTCTTTTGTTCATTGTGGGCC        |
| 22512 | Acvr2a   | CTGGCAAGTCTGCAGGTGAC    | AAATGCGTCCCTTTGGAAGTT        |
| 14002 | Serpine1 | CACCGTCTCTGTGCCCATG     | GGTAGGGCAGTTCCACAACG         |
| 6328  | Acvr1b   | AGACGCTCCAGGATCTCGTC    | TTGTAAAACAATGGTTCGGGC        |
| 10778 | Bmp7     | CAGCCACTTCCTCACTGACG    | GGAACTCCCGATGGTGGTATC        |
| 15652 | Axl      | TGTTTCCTTGTCATCGGAGG    | CTTTCGGACACGGTACCTGAC        |
| 18823 | Mras     | TCTACTCCGTCACCGACAAGG   | CACGAGGATCATTGGGAATGA        |
| 4593  | Fgfr4    | CCATCCACTGGCTCAAGGA     | CACACTTTCATCACCAGGCT         |
| 12287 | Tek      | GGGTGTTCCCTGTGCCACAG    | TTGGTACAGTGGCACCTGAGC        |
| 19036 | Tgfbr2   | GCCTGTAACATGGAAGAGTGCA  | ACACCCGTCACTTGATAATGAC       |
| 11751 | Bmpr1b   | TCTCAGAGCTCGGGAAGTGG    | CCATAGCGGCCTTTTCCAAT         |
| 3979  | tgfb3    | CCAAGCGCACAGAGCAGA      | CCTTGTGGGCAGATTCTTGC         |



|       |           |                           |                          |
|-------|-----------|---------------------------|--------------------------|
| 15739 | Map4k1    | CGCCTTTCTTTTCATTGGGAC     | CCAAGAGACCAGATGTGCGCA    |
| 4249  | Inhba     | GAACTCATGGAGCAGACCTCG     | GACAGGTCACCTGCCTTCCTTG   |
| 4566  | Ror2      | TGTGGCTACCAACGGGCT        | GATCGTCATCCTGAAAATTGTGG  |
| 12316 | Ror1      | AGAGCCCGGAAGCTGCA         | CCGGTAGTCTACACCCGTGC     |
| 6069  | Map3k7ip1 | CCAGATGGTCAACGGCTCTC      | GCGTGTGGTGGACTGCAG       |
| 10649 | Hnf4a     | GTTACTGCAGGCTTAAGAAGTGCTT | GTCCCTCGTAGCTTGACCTCCG   |
| 8270  | Pdgfrb    | AGCTCACGGTCT GAGCCATT     | GCTCGGACATTAAGGCTTGC     |
| 3973  | Fos       | TGGTGAAGACCGTGTGAGGA      | CCTTCGGATTCTCCGTTTCTC    |
| 18602 | Smad6     | GCTGTCTCCTCCTGACCAGTACA   | CACCCGGAGCAGTGATGAG      |
| 2137  | Egfr      | GTGGAGGGACATCGTCCAAA      | CATTGGGACAGCTTGATCA      |
| 6377  | Amhr2     | GCTGCTTTGGGATCTGGAATC     | GTCACAGTGGAGGGACTCACAG   |
| 11682 | Pitx2     | CCTTACGGAAGCCCGAGTC       | CAAAGCCATTCTTGACACAGC    |
| 1899  | Inhbc     | GGAAACCCTGTTGGAGCATG      | GGAACTCGAGCCGGGTCT       |
| 22224 | Ltk       | CAAGTGGATGCCGCCAG         | ACCCAGTGAGAAGATCTCCC     |
| 13243 | Fgfr3     | AGGCCACCTTCAAGCAGTT       | GAGTACTGCTCAAACGGCACG    |
| 19036 | Tgfbr2    | GCCTGTAACATGGAAGAGTGCA    | ACACCCGTCACTTGATAATGAC   |
| 12742 | Runx3     | CAACGCTTCCGCTGTCATG       | CGGTGATTGTGAGCGTAAAA     |
| 13425 | Pdgfra    | GACCCCATGCAGTTGCCTTA      | TCGAC CACTTTCCCAAATGC    |
| 21673 | Ddr2      | TCCTGGGTTCTGCAAAAAGCT     | ACTTGAGGCTGTGATGTCTCA    |
| 12487 | Tie1      | GCCATGATCAAGAAGGACGG      | TCTAGTTCACCTGCAAAGTCTCGA |
| 6240  | Vdr       | AAGGACAACCGGCGACACT       | TTACGCTGCACCTCCTCATCT    |
| 7287  | Nkx2-5    | CCTACGGTGACCCTGACCC       | GCCATCCGTCTCGGCTTT       |
| 1078  | Tgfb2     | CGAGGAGTACTACGCCAAGGA     | CCAATGAGCCAGAGGGTGT      |
| 13425 | Pdgfra    | GACCCCATGCAGTTGCCTTA      | TCGAC CACTTTCCCAAATGC    |
| 20368 | Runx2     | TAAAGTGACAGTGGACGGTCCC    | GCCCTAAATCACTGAGGCCGA    |
| 7851  | Alk       | CGGTGGCAAGTGAGGACC        | TCACTGTTGCACCTTCAGAAGC   |
| 4249  | Inhba     | GAACTCATGGAGCAGACCTCG     | GACAGGTCACCTGCCTTCCTTG   |
| 11682 | Pitx2     | CCTTACGGAAGCCCGAGTC       | CAAAGCCATTCTTGACACAGC    |

|                |         |                                 |                                 |
|----------------|---------|---------------------------------|---------------------------------|
| Akt3.aSep07    | Akt3    | TTCCGTCCACTCTTCTCTTTCC          | ATGTCTTCAGTGGACCACTGTTATAGA     |
| Akt3.bSep07    | Akt3    | TTTATCATTTTCCAGCCCTTTCC         | TGTCTTCAGTGGACCACTGTTATAGAG     |
| Akt3.bSep07    | Akt3    | CTCCTCCTCTTGCCTCTGCA            | TCTTCTGAGAAAACGAGAAGAGTGG       |
| Axin1.bSep07   | Axin1   | CCGCAGGCGTTTGGAAAG              | CCTTTCTTTGTGATTTTGTCTCTG        |
| Axin1.aSep07   | Axin1   | TTGGAACTCTCCGAGACAGAGAC         | CAATGCTGTACATGGTGGTG            |
| Axin1.aSep07   | Axin1   | CAGCTGGAAGAGGCCCG               | TGACTGCCTGCACATACCTCTG          |
| Axin2.aSep07   | Axin2   | AAGCAGCCGTTTCGCGAT              | CATGTGAGCCTCCTCTCTTTTACAG       |
| Axin2.bSep07   | Axin2   | CGCCAGCGGATCAATGA               | TTCTTCCAGTTTCTCTCAGCAAT         |
| Crebbp.aSep07  | Crebbp  | TGAAACACTTCTCACAGAAATGATACCT    | CAGCTGTGTACAATTCTCTCGTGAT       |
| Crebbp.bSep07  | Crebbp  | GAAGGCCATACTTGGGTGAACT          | GGAAAGCAGCTGTGTACAATTCTCT       |
| Csnk1a1.aSep07 | Csnk1a1 | GCATACAAAGAATTTTATACACAGAGACATT | CCACTGGAGATTCTAAACACTTATTACAG   |
| Csnk1a1.bSep07 | Csnk1a1 | GACAAAACCAAGAGTAACATGAAAGGT     | GCTCCAATCGTCTGCTCTGC            |
| Csnk1a1.dSep07 | Csnk1a1 | CCAGCAGGCAGCCTCTTC              | TTCCACAATTCATGCTTAGAAAACCT      |
| Csnk1a1.kSep07 | Csnk1a1 | AGGATTCATTCATAACAGGAACAGAGA     | TCCAGAGCGCATCTTCACTG            |
| Csnk1a1.aSep07 | Csnk1a1 | CCCAAACCCCCACAGGTATT            | TCACTTTTCTTTTCAAGGAAACATACT     |
| Csnk1a1.bSep07 | Csnk1a1 | TTGGGCGTCACTGTAATAAGTTATTC      | TTGCCTTGTCTGTTGTCTCTG           |
| Csnk1g1.cSep07 | Csnk1g1 | GCACCGCTGATTTAGGGATACA          | TGTTACTCTACCTTTGAAGTCTTGTCTTCTT |
| Csnk1g1.aSep07 | Csnk1g1 | GCACCGCTGATTTAGGAGGA            | TCACTTACTCACCAGTTAAGCCCC        |
| Mark2.aSep07   | Mark2   | AGGAGGCTGTGGCAGGC               | CAAGTTTGTCCGCAGGAACC            |
| Mark2.eSep07   | Mark2   | CCACTCGTCTTTTGCTTTCAG           | TCCCTTCTGGGACAGAGC              |
| Mark2.cSep07   | Mark2   | AGGAGGCTGTGGCAGGC               | TTTCAGGTTTGCAGAAAGGAAC          |
| Myc.bSep07     | Myc     | CTCCTGAAAAGAGCTCCTCGAG          | GTCGTGGCTGTCTGCGG               |
| Myc.cSep07     | Myc     | CGTTGGAAACCCCGACAG              | TCGTAGTCGAGGTCATAGTTCCTG        |
| Myc.dSep07     | Myc     | TAAGTCCCTGCTCGAAGGAGG           | CGTCGTGGCTGTCTGTATCAGT          |
| Pik3c2a.bSep07 | Pic     | TGAATTCAAACACCCACTGGC           | CCTTGGAGGGCGCGA                 |
| Pik3c2a.bSep07 | Pic     | CCAAAATACCAGGACCTGGAAA          | GAAGGAAGCATCCCTGTTTGAA          |
| Pik3c2a.aSep07 | pic2a2a | TCCAAAATACCAGGACCTCACG          | GGACCTTGGAGGGCGC                |
| Ppp2r4.aSep07  | Ppp2r4  | AGGCGGTGAGCGAGAACC              | GGCCAGTCTTCATCTCAGTG            |

|                |          |                            |                           |
|----------------|----------|----------------------------|---------------------------|
| Ppp2r4.eSep07  | Ppp2r4   | GTGCTGTCCCCTCCTGGTC        | GGGAACTTCTCCAGGCACTCT     |
| Ppp2r4.hSep07  | Ppp2r4   | GGAACGCAGCGTCTATGAAGA      | CCCTGGTTCACTTTAGACCAGG    |
| Ppp2r4.lSep07  | Ppp2r4   | CCTTTCCTGTCTCCAGATGAA      | GGGACAGCACTGATGTTCCAC     |
| Ppp2r5d.aSep07 | Ppp2r5d  | GTGGGCGTCTCTGTCTCCAT       | GGCTCAATCCCCAGTACCCT      |
| Tgfb2.aSep07   | Tgfb2    | TGAGACATCAAAGCGGACGAT      | GCTCTGTGGGTACCTTGATGC     |
| Tgfb2.bSep07   | Tgfb2    | TGAGACATCAAAGCGGACGA       | CCACCTCCCCCTCCGAAAAT      |
| Zfp42.bSep07   | zfp42    | AGCTCTTAGTCCATTTCTCTAATGCC | TCAGAAAGGAAACCAAGGAGGA    |
| Zfp42.eSep07   | Zfp42    | CCAGCTCTTAGTCCATTTCTCACA   | GAGAAAAGGATCCCTGTCTCGAA   |
| Zfp42.eSep07   | Zfp42    | AGAAAAGTTGGTCGGTAGTATGGC   | CATCGCTGTGGGCATTAGAA      |
| SNP validation | EG668668 | GGTCCTGACTTTCCCATCAA       | TAAGCTGACTGGCGTGTTTG      |
| SNP validation | Uchl4    | ATGCCATTGCAAACAACAAA       | GGTGCCCTCAGTCTGACCTTC     |
| SNP validation | Car4     | GAAGCAATGAGCAGGTAGGC       | GCAGGTCTCCTCCGATAATG      |
| SNP validation | S100a11  | TGCCATGATTCTTTTCATCCA      | CAGCTCCTGTACCAGCTTC       |
| SNP validation | Nusap1   | TAGGAAGCAGTCGTCAGTGC       | CATTACCTGGGAGGTAGGA       |
| SNP validation | Lars2    | CGATCCTTCTGACCTTTTGG       | ACGCTTGGTGAATTCTGCTT      |
| SNP validation | Ras12-9  | AGGGGGCTAAATACGCAAGT       | GACTGCTCTCCCAGATGAGG      |
| SNP validation | Zkscan1  | TCTAGAGCCAGGTTGGCAGT       | CCCCTCACTGGTTCACTTGT      |
| SNP validation | Tagln2   | TGGGCTGTACTTACCACACG       | AGCCAGAATCCATGCAAAAC      |
| SNP validation | Samd8    | AACCCTGCCGTTCACAATAG       | TGACGAGAAACCCAAGGAAG      |
| SNP validation | Imp4     | GTCTTTGTCACCAGCAGCAA       | TAACCAGCCATAGGGCACTC      |
| SNP validation | Pgam1    | CTCAGGGCAAGGTGAAGAAG       | TGGGTGCAGGGGATAAAAATA     |
| SNP validation | Arid3b   | TCATCCAGACTCCAGCTCGG       | AGAGGCCCCAGGCTGCTTC       |
| SNP validation | C80913   | AGCACCTTTCAAGTTCACCCA      | CAGTCATGGCATTTCCTTTTAAAC  |
| SNP validation | Dnttip2  | GTGTGTTTCAGAGGACTCAGATGCT  | AAGAGACACAACATTGGCTCGTT   |
| SNP validation | Nbn      | CCAAGCCTTTCCCAAGTCCT       | CGCTCCATTCCATGCTTTGT      |
| SNP validation | Rnf14    | TCTCCCATTGTGTGCATTCTTT     | AAATTCTGTGGCAGATCCAAATAGA |

---

## Supplementary Methods.

### Expression Genomics Laboratory SQRL protocol

**Background:** The primary aim for developing this protocol is to massively shotgun sequence the transcriptome. The method was designed to meet the following essential criteria:

- 1) It has to be random primed to ensure transcriptome coverage.
- 2) It has to work off a reasonable amount of RNA (deemed 50-100ug of total RNA).
- 3) It has to be directional (ie not lose strandedness).
- 4) It has to generate a library of small linear PCR ready products (<200bp) with different sequences at either end compatible with whatever sequencing tech is to be applied.

Several methods were applied to this approach. The most successful by far was the template switch-mediated library generation off fragmented RNA. The protocol has been applied primarily to mRNA but is equally amenable to studying non-adenylated material (underway).

### Shotgun transcriptome libraries for next-gen Sequencing

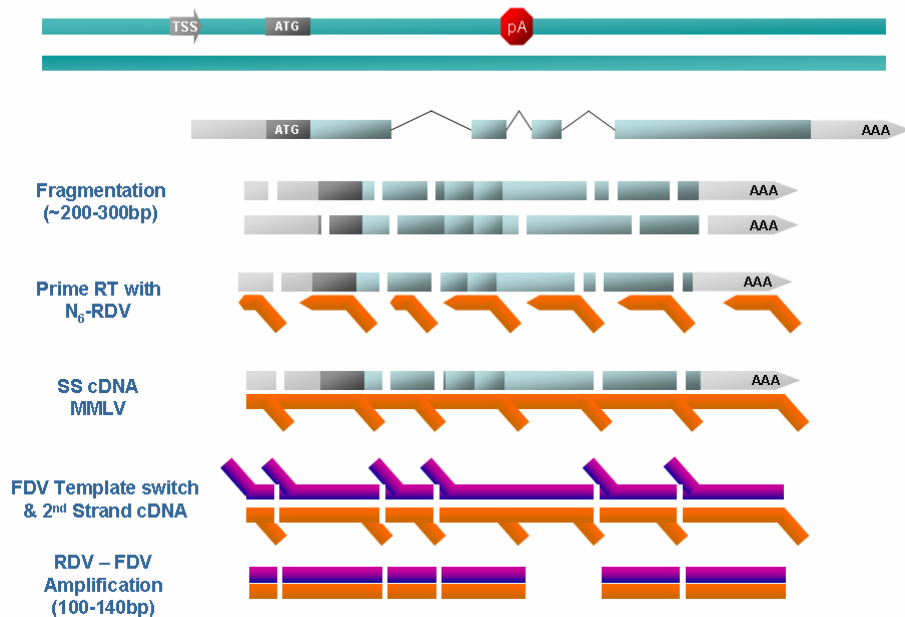

The library method commences with RNA fragmentation followed by first strand cDNA synthesis which is primed using a tagged random hexamer. A modified MMLV Reverse Transcriptase is used in the cDNA synthesis to allow for non-templated Cs to be added to the 3' termini of the completed 1<sup>st</sup> strand cDNAs. A tagged ribo-G primer is then used to prime

off the non-template C tail to generate double stranded cDNAs (this process is known as template switching). The library is then PCR amplified using primers complementary to 5' and 3' tag sequences and size selected via electrophoresis to obtain optimally sized amplicons. ePCR and sequencing. Finally, samples are size selected by gel electrophoresis, and QCed before sequencing. The sequencing is carried out from the random hexamer to maximize random distribution of tags.

## **1. RNA preparation:**

**Notes:** The work to date has focused on the polyA transcriptome. A series of different RNA purification methods, and different combinations of depletion and RNA preps were tested :-

\*1 round of Oligotex polyA is insufficient (approx 10% ribosomal contamination, mainly 18s). \*1 round of Ribominus is insufficient (approx 20% ribosomal contain, mainly 28s, also 5s and fragments)

\* Single rounds of polyA prep followed by depletion are better than 2 rounds of polyA purification.

\*Reversing the order of depletion and polyA preparation provided a similar quality product with a lower yield.

Briefly, we prepare total RNA via RNAeasy spin column purification exactly following the manufacturer's protocol (URL for protocol is: ). The amount of RNA prepared has varied depending on the starting material. In every case, total RNA should be quantified by nanodrop spectrophotometry and checked for integrity and quality by bioanalysis prior to continuing to the next step.

50- 300ug of total RNA is then subjected to a single round of polyA selection using Oligotex mRNA Mini Kit. (Qiagen: Cat ID70042). using the spin column method. 100ug of total RNA generally yields sufficient material for 2 library preparations. (text below is taken directly from QIAGEN's protocol PDF with our comments added in RED).

Finally, the PolyA preparation is then subjected to 1 round of Ribominus ribosomal depletion (Invitrogen: Cat ID: K1550-02).

### **1.1 Oligotex mRNA Spin-Column Protocol For isolation of poly A+ mRNA from total RNA**

Abridged text taken directly text from Qiagen's Oligotex mini protocol  
<http://www1.qiagen.com/literature/handbooks/literature.aspx?id=1000156> ).

#### ***Important notes before starting:***

- **Ensure buffers are appropriately prepared.**
- **Heat Oligotex Suspension to 37°C. Vortexing prior to use, then place at RT.**
- **Heat a water bath or heating block to 70°C, and heat Buffer OEB.**
- **Review the introductory material on pages 12–19 before starting.**

- **If working with RNA for the first time, please read Appendix A (page 76).**
- **Buffer OBB may form a ppt upon storage. If necessary, re-dissolve at 37°C, then RT**
- **Unless otherwise indicated, all steps, including centrifugation, should be performed at RT.**
- **All centrifugation steps should be performed in a micro-centrifuge at maximum speed.**

1. Determine the amount of starting RNA. Do not use more than 1 mg. The initial volume of the RNA solution is not important so long as the volume can be brought up to the indicated amount with RNase-free water. Make up the total RNA to 250µl with H<sub>2</sub>O and add 250µl of Buffer OBB.

2. Add 15µl of Oligotex Suspension. Mix the contents thoroughly by pipetting or flicking the tube. Incubate for 3 min at 70°C in a heating block. This step disrupts secondary structure of the RNA.

4. Remove sample from the water bath/heating block, and place at 20 to 30°C for 10 min. This step allows hybridization between the oligo dT30 of the Oligotex particle and the poly-A tail of the mRNA.

5. Pellet the Oligotex:mRNA complex by centrifugation for 2 min at maximum speed (14,000–18,000 x g), and carefully remove the supernatant by pipetting. Loss of the Oligotex resin can be avoided if approximately 50µl of the supernatant is left in the microcentrifuge tube. The remaining solution will not affect the procedure. Note: Save the supernatant until certain that satisfactory binding and elution of poly A+ mRNA has occurred.

6. Resuspend the Oligotex:mRNA pellet in 400µl 1 Buffer OW2 by vortexing or pipetting, and pipette onto a small spin column placed in a 1.5 ml micro-centrifuge tube. Centrifuge for 1 min at max speed.

7. Transfer the spin column to a new RNase-free 1.5 ml micro-centrifuge tube, and apply 400µl Buffer OW2 to the column. Centrifuge for 1 min at maximum speed and discard the flow-through.

8. Transfer spin column to a new RNase-free 1.5 ml micro-centrifuge tube. Pipette 20µl hot (70°C) Buffer OEB onto the column, pipette up and down 3 or 4 times to resuspend the resin, and centrifuge for 1 min at maximum speed. Note: The volume of Buffer OEB used depends on the expected or desired concentration of poly A+ mRNA. Ensure that Buffer OEB does not cool significantly during handling. Remember that small volumes cool down quickly. With multiple samples, it may be necessary to place the entire micro-centrifuge tube (with spin column, Oligotex, and sample) into a 70°C heating block to maintain the temperature while preparing the next samples.

9. To ensure maximal yield, pipette another 20µl hot (70°C) Buffer OEB onto the column. Pipette up and down 3 or 4 times to resuspend the resin, and centrifuge for 1 min at maximum speed. To keep the elution volume low, the first eluate may be used for a second elution. Reheat the eluate to 70°C, and elute in the same micro-centrifuge tube. However, for maximal yield, the additional volume of Buffer OEB is recommended.

10: Check selection on Bioanalyzer pico chip (load 0.5-1ng per well). Quantify by nanodrop rather than relying on Bioanalyzer estimates. Figure 2 shows the expected profile from pico chip bioanalysis after each stage of RNA preparation. Expected yield of mRNA from 100ug of total RNA is in the order 300ng.

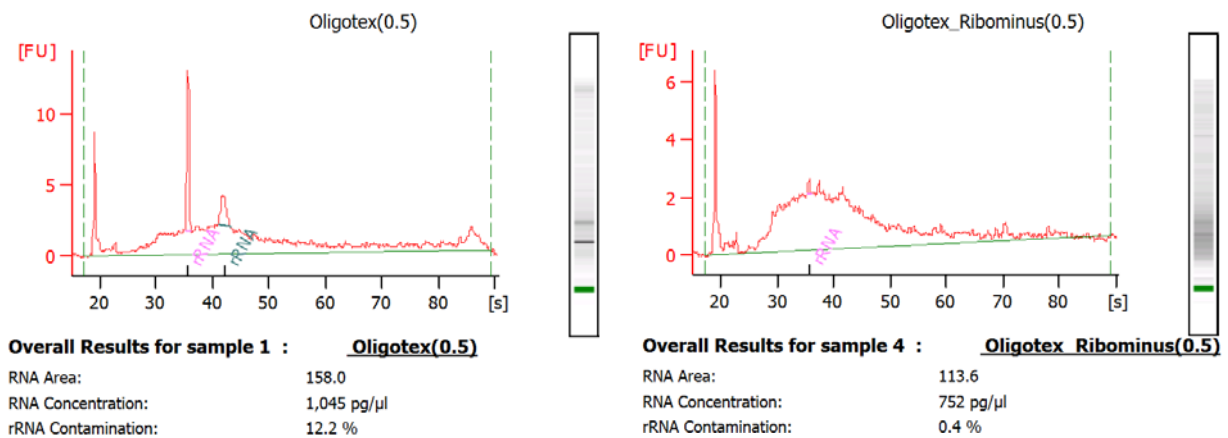

Figure2: Pico chip Bioanalyzer profiles of polyA prepared and ribo-depleted RNA.

## **1.2 Ribo-depletion of mRNA**

### ***Starting Material:***

The protocol typically uses total RNA. We have found that it works better starting with mRNA for our sequencing purposes. We have tested the amount of starting material and up to 5ug of message can be used effectively.

Protocol is an abridged version of text taken directly from the manufacturer's manual [http://www.invitrogen.com/content/sfs/manuals/ribominus\\_human\\_mouse\\_man.pdf](http://www.invitrogen.com/content/sfs/manuals/ribominus_human_mouse_man.pdf)

***Selective hybridization:***

1. To a sterile, RNase-free 1.5 ml micro-centrifuge tube, add the following:
  - RNA (2-10 $\mu$ g): <20 $\mu$ l
  - RiboMinus™ Probe (100 pmol/ $\mu$ l): 8 $\mu$ l
  - Hybridization Buffer (B5): 300 $\mu$ l
2. Incubate the tube at 70-75°C for 5 minutes to denature RNA. Allow the sample to cool to 37°C slowly over a period of 30 minutes by placing the tube in a 37°C water bath.

***Prepare RiboMinus™ Magnetic Beads:***

1. Resuspend the RiboMinus™ Magnetic Beads in its bottle by thorough vortexing.
2. Pipette 500 $\mu$ l of the bead suspension into a sterile, RNase-free, 1.5-ml microcentrifuge tube.
3. Place the tube with the bead suspension on a magnetic stand for 1 minute. Gently aspirate and discard the supernatant.
4. Add 500 $\mu$ l sterile, RNase-Free Water to the beads and resuspend beads. Place the tube on a magnetic stand for 1 minute. Gently aspirate and discard the supernatant.
5. Repeat Step 4 once.
6. Resuspend beads in 500 $\mu$ l Hybridization Buffer (B5). Place the tube on a magnetic stand for 1 minute. Gently aspirate and discard the supernatant.
7. Resuspend beads in 200 $\mu$ l Hybridization Buffer (B5) and keep the beads at 37°C until use.

***Removing rRNA***

1. Transfer ~328  $\mu$ l of the cooled hybridized sample (from Step 3, previous page) to the prepared RiboMinus™ Magnetic beads from Step 7, previous page, and mix well.
2. Incubate the tube at 37°C for 15 minutes. During incubation, gently mix the contents occasionally.
3. Place the tube on a magnetic stand for 1 minute to pellet the rRNA-probe complex. The supernatant contains the RiboMinus™ RNA fraction.
4. Transfer the supernatant (~ 528  $\mu$ l) to a tube capable of holding 3X volume of the supernatant.  
Concentrating RiboMinus™ RNA using RiboMinus™ Concentration Module.



**5. The Recovery Tube contains purified RiboMinus™ RNA.** Store RiboMinus™ RNA at -80°C or place RiboMinus™ RNA on ice to proceed to desired downstream application.

## **2.1 Fragmentation of RNA**

Notes: The fragmentation step is a necessary and critical part of this protocol. Generation of a directional shotgun cDNA library by template switching requires random fragmentation of the RNA. Next-gen sequencing also requires small amplimers for efficient and unbiased PCR of sequencing templates.

We currently use 2 different methods of RNA fragmentation. Both appear to give an unbiased tag representation in the libraries we have prepared to date. While the original work has relied on chemical fragmentation we are also using heat as an alternative, given the ability to control it and the avoidance of clean up steps. Protocols for both are provided.

We have found that both Concentration and Volume are important parameters in the fragmentation process and the amounts suggested here have been optimized to give the best size range of amplimers and minimal primer-dimer etc down stream.

It is strongly recommended you calibrate this step independently in your lab prior to starting on real samples. We have used a mixture of total and aRNA (made from the standard message Amp kit from Ambion) as a cost-effective proxy to mRNA for optimizing this step. *Differences in fragmentation can effect the representation of sequence tag sampling and this can have serious consequences if you are looking to do comparative quantitative analyses across sequence runs.*

Note: We have found considerable batch to batch variation with chemical fragmentation reagents. We have also found that the heating step needs to be carried out in *a PCR machine with a heated lid*. The times and temps here have been optimized on a MJ Research Engine Tetrad. We also recommend accurate pipettors be used! The volumes have been kept small to ensure sample volumes and RNA requirements are kept to a minimum.

### **2.1.1 Fragmentation of RNA by Zinc Acetate protocol:**

Chemical fragmentation is routinely used to break up long labeled aRNA molecules prior to hybridizing to microarrays. We used this approach as it minimized the volume needed to fragment (sonication needs a decent volume) and

1. The suggested amount of starting material 8  $\mu$ l polyA depleted RNA (~300ng).
2. Add 0.9  $\mu$ l fragmentation buffer: (buffered Zinc acetate, AMBION:8740)
3. Heat to 70<sup>0</sup>C for a period of time that give you optimal fragmentation to >100 and <200bp. In our hands this equates to **2 mins, performed** in PCR machine with a heated lid). Suboptimal results have been observed in the absence of the hot lid. It is strongly suggested you carry out a panel of fragmentations for different periods and follow them through to library synthesis and review the overall size of template to ensure you are in

an optimal range. This material cannot be run directly on the Bioanalyzer prior to purification due to the fragmentation buffer.

4. Chill on ice and add 0.9 $\mu$ l STOP solution (supplied in AMBION kit)

5. Dilute to 500 $\mu$ l with ice cold RNase free water.

6. Keep on ice until purification

NOTE =Even when the system has been calibrated, we recommend running an independent positive control RNA sample of the same amount, to show that the fragmentation and cDNA synthesis works efficiently.

7. Purify fragmented RNA by ultra-filtration on a YM-30 column (Millipore) (CAT ID# )

8. Spin for 12 mins at 13,000 rpm. Check the volume retained on the filter. If you can see or almost see the filter, invert filter and collect retained sample via a pulse spin to 10,000rpm

9. Check the amount recovered. If < 1.7 $\mu$ l, make up to 1.7 $\mu$ l. If the amount exceeds >1.7  $\mu$ l, concentrate by vacuum centrifugation and make up to 1.7 $\mu$ l. DO NOT OVER DRY.

10. Check fragmentation on Bioanalyzer pico chip (load 0.5-1ng per well). See Fig 3 for expected results:

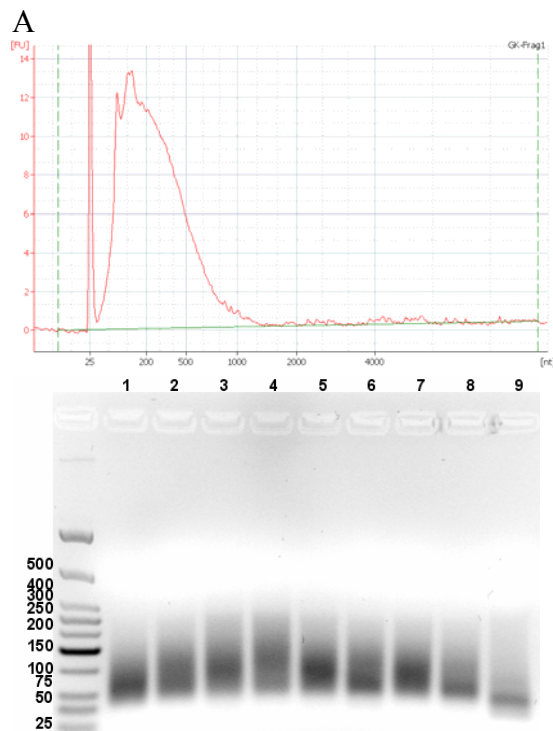

**A:** Bioanalysis of fragmented RNA after clean up. **B:** Examples of library generation from a spectrum of different fragmented RNAs: RNAs from a spectrum of 1: (300ng Hek total, 0.6ul frag reagent in 6ul 5min), 2: (300ng amplified, 0.6ul frag reagent in 6ul 5min), 3: (300ng Hek total 0.6ul frag reagent in 6ul 2min), 4: (300ng amplified 0.6ul frag reagent in 6ul 2min), 5: (300ng Hek total 0.06ul frag reagent in 6ul 5min), 6: (300ng amplified 0.06ul frag reagent in 6ul 5min), 7: (600ng Hek total 0.6ul frag reagent in 6ul 5min), 8: (600ng amplified 0.6ul frag reagent in 6ul 5min), 9: (300ng Hek total UNFRAGGED -), 10: (300ng amplified UNFRAGGED -), 11: (NO RNA), 12: (NO RNA/RT),

### **2.1.3: Alternate Protocol: Fragmentation of RNA by heat method:**

1. Transfer 300ng of mRNA to a 200 $\mu$ l PCR tube at 100ng/ $\mu$ l concentration. Adjust volume to 4.5 $\mu$ l with nuclease free H<sub>2</sub>O.
2. Place on heating block (PCR block) at 95<sup>0</sup>C for optimized period. In our hands this is 20-30mins. has proven optimal. (see figure 4).
3. Transfer to ice for minimum 2mins;
4. Concentrate fragmented RNA in speedi-vacuum (~5-10mins) to 1.5  $\mu$ l.

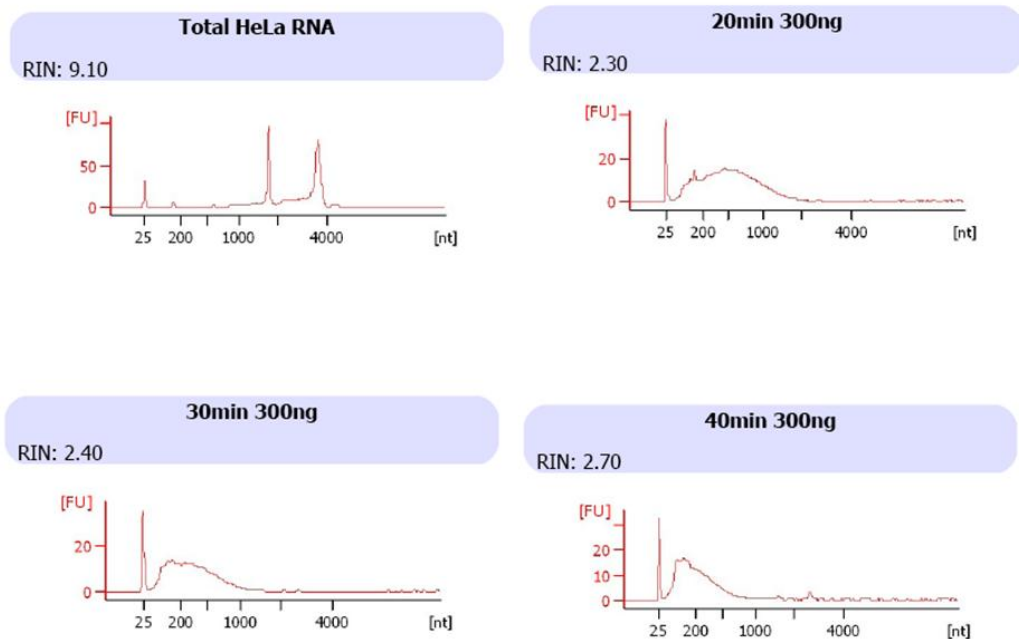

Figure 4: Pico Bioanalyzer profiles on 300ng total RNA subjected to 95<sup>0</sup>C over 20min-40min.

### **3.1 cDNA synthesis with template switch.**

Notes: This protocol uses template switching (which is used in Clontech's SMART protocol). It is dependent upon an modified MMLV's ability to add non-templated C's as a 3' overhang once reverse transcription reaches the end of a DNA template. These extra C's are used to hybridize a GGG stretch of the template switch primer. The RT then continues on to the end of the template switch primer. This generates a 1<sup>st</sup> strand fragment with FDV and RDV sequences at each end.

Since the design of this protocol, Clontech has ceased producing Powerscript reverse transcriptase. Superscript II can be used as a substitute. NOTE: Superscript-III will make good first strand cDNA but will NOT add non-templated bases.

Special comment needs to be made regarding controls. BOTH a no RNA, and a no RNA & no RT control should be included. The template negative control WILL generate primer dimers using the primers optimized for SOLiD sequencing. This product is ~100bp and efforts have been made to minimize its amplification. As the library is size selected post amplification, it is possible to avoid this if it is a minor contaminant.

#### **3.1.1 Protocol:**

1. Make up required amount of sFDV-hex primer at 2 $\mu$ M (Stock at 10 $\mu$ M)

2. Preheat one PCR block to 72<sup>0</sup>C and a second PCR block to 20<sup>0</sup>C

3. Prepare the following reagents on ice

| Reagent                 | Control 1 | Control 2 | Test.... |
|-------------------------|-----------|-----------|----------|
| dH2O                    | 1.5       | 1.5       | 0        |
| RNA (250ng/1.5 $\mu$ l) | 0         | 0         | 1.5      |
| sFDVhex (2 $\mu$ M)     | 0.5       | 0.5       | 0.5      |

4. Heat mix to 72<sup>0</sup>C for 10min followed by chilling on ice for 2min. Note: This step is under scrutiny to determine the optimal temperature for minimizing hexamer mis-priming.

5. Add RT reagents (both Powerscript and Superscript II volumes are provided for a single RT reaction). A master mix should be made and added to primed RNA when multiple samples libraries are being prepared.

| <b>Powerscript</b>    | $\mu$ l | <b>Superscript II</b> |
|-----------------------|---------|-----------------------|
| $\mu$ l               |         |                       |
| Powerscript RT Buffer | 1.0     | Superscript RT Buffer |
| 1.0                   |         |                       |

|                                          |     |                       |
|------------------------------------------|-----|-----------------------|
| DTT (20mM – be careful to check)<br>0.5  | 0.5 | DTT (20mM)            |
| dNTP (10mM each nucleotide)<br>0.5       | 0.5 | dNTP(10mM each)       |
| Powerscript reverse transcriptase<br>0.5 | 0.5 | Superscript II enzyme |

6. Move samples to thermocycler. NOTE: DO NOT USE A HEATED LID. Including the lid affects cDNA synthesis and the amount of primer dimer. Incubate the samples at 20<sup>0</sup>C for 10min, followed by 37<sup>0</sup>C for 10min and then 42<sup>0</sup>C for 45min. This is necessary to generate full length 1<sup>st</sup> strand cDNAs and template for each fragment.

7. Add 0.5µl of heat denatured 10uM RDV-GGG template switch primer to each tube and incubate for a further 15min at 42<sup>0</sup>C. This is required to prime 2<sup>nd</sup> strand from non-templated Cs present on the end of the single cDNA strand. Heat Denaturing of RDV-GGG template switch primer prior to priming (72<sup>0</sup>C for 5min) is required to maximize the efficiency of 2<sup>nd</sup> strand cDNA synthesis.

8. Stop the cDNA synthesis by > 95<sup>0</sup>C for 5min.

#### **4.1 PCR amplification of cDNA library (using Advantage polymerase from Clontech)**

Set up the following

|                             |                                         |
|-----------------------------|-----------------------------------------|
| H2O                         | 13.5ul                                  |
| 2mM dNTP each               | 2.5ul                                   |
| 10x Buffer                  | 2.5ul                                   |
| 10uM AMPRDV                 | 2.5ul (needed to minimize primer dimer) |
| 2uM LAMPFDV                 | 2.5ul                                   |
| 1 <sup>st</sup> strand cDNA | 1.0ul                                   |
| Advantage DNA polymerase    | 0.5ul                                   |

|             |         |                                           |
|-------------|---------|-------------------------------------------|
| FDV primers | sFDVhex | CTTTCCTCTCTATGGGCAGTCGGTGATNNNNNN         |
|             | LAmFDV  | CCACTACGCCTCCGCTTTCCTCTCTATGGGCAGTCGGTGAT |
| RDV primers | AmpRDV  | AACTGCCCCGGGTTTCCTCATTCTCT                |
|             | RDV-GGG | AACTGCCCCGGGTTTCCTCATTCTCTrGrGrG          |

Thermocycle as follows:     1 x    94<sup>0</sup>C -> 5 min (activate the polymerase)  
                                      20 x   94<sup>0</sup>C -> 15s, 68<sup>0</sup>C -> 15s }

NOTE for the AMPRDV concentration is it is at 5x normal primer concentration, to avoid concatamers

#### **4.2 Size Selection of ampimers via gel electrophoresis**

1. Load the entire library onto a 1xTAE 3% agarose gel and run at 100V, 55 minutes with LMW ladder.
2. Cut out band with a scalpel. Use a unique scalpel every time.
3. Purify DNA via Qiaquick agarose extraction:
4. Optional: Reload the purified material onto another 3% Agarose gel and repeat purification. (we've found this necessary to remove smaller amplicons).
5. Quantify final amplicon pool concentration by nanodrop.

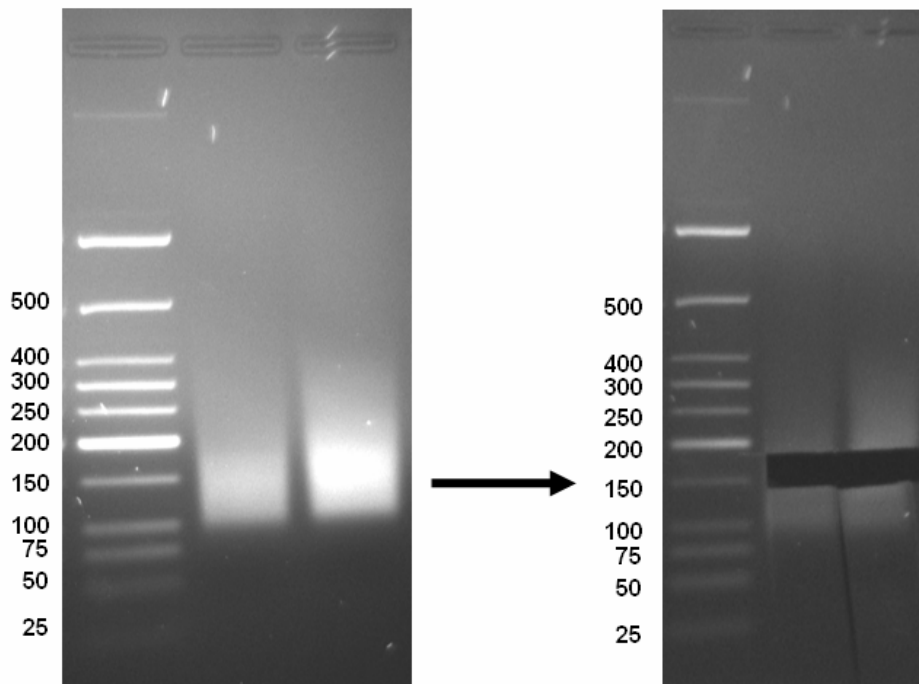

#### **4.3 Assessing library synthesis.**

A good library should have a smear ranging from 100 to 300 with the majority of the product in the 120 – 180 range. (lanes 1 and 2 of the first gel below are good syntheses).

A failed or poor synthesis is generally characterized by a strong band just below 100 and a very faint smear if anything. The figs below show examples of good Vs poor product range.

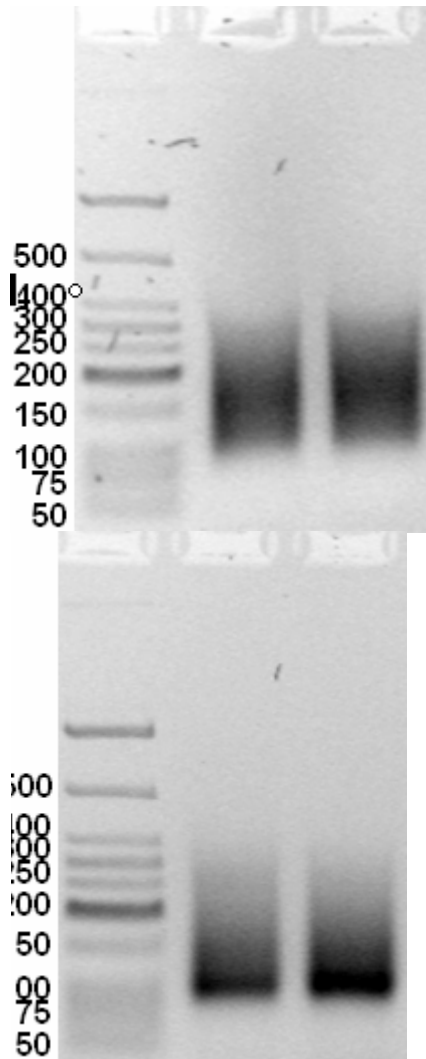

### **5. Library QC by sequencing.**

Notes: We QC libraries prior to SOLiD sequencing by both capillary sequencing of cloned amplicons and accurate quantification. To sequence, we take 1ul and 0.1ul of eluted library and clone into a TA cloning vector (TOPO-TA PCR-TOPO).

Pick 96 colonies and prepared plasmid DNA via for 96well miniprep. Samples are sequenced using standard AB sequencing via core.

Sequences are reviewed on the following criteria:

- Insert size
- Length of mappable sequence (BLAT UCSC and BLAST NCBI)
- Count of non-templated Gs at the 5' end.

*Critical statistics:*



1) Median amplicon size: Currently our preferred median insert size of 50bp. This size is preferred as it suits our read length (we're currently getting 35mers).

2). Range of amplicon size: In some cases we have had a good median size but too broad a size range. Ideally you want to ensure that all sequences are larger than the minimum read length. Insert size for us now should be a min of 35bp long and max of 70bp).

3) %Ribosomal RNA: Ribosomal RNAs are a common contaminant if depletion was poor.

4) Position relative to full length sequences: Once tags are mapped to their respective genes, we check to see if the tags are spread across the entire length of the transcript Vs biased towards the 3' or 5' end.  
(check for 3'/5' biases)
